# Supplementary material for: Iridium-catalyzed asymmetric allenylic substitution of tertiary racemic allenylic alcohols with indoles
Source: Royal Society of Chemistry journal article supplement (doi:10.1039/d4qo01671h), 2024-11-20
Supplement: d4qo01671h1.pdf [file d4qo01671h1.pdf]

**Supporting Information for**  
**Iridium-Catalyzed Asymmetric Allenylic Substitution of Racemic Tertiary**  
**Allenlyc Alcohols with Indoles**

Takahiro Sawano,<sup>a,b</sup> Manami Kobayashi,<sup>b</sup> Momoko Ishikawa,<sup>b</sup> Eri Ishikawa,<sup>c</sup> Ryo  
Takeuchi<sup>b,\*</sup>

<sup>a</sup>*Department of Materials for Energy, Shimane University, 1060 Nishikawatsu-cho, Matsue, Shimane, 690-8504, Japan*

<sup>b</sup>*Department of Chemistry and Biological Science, Aoyama Gakuin University, 5-10-1 Fuchinobe, Chuo, Sagamihara, Kanagawa 252-5258, Japan*

<sup>c</sup>*Department of Applied Chemistry, Chubu University, 1200 Matsumoto-cho, Kasugai 487-8501, Japan*

*E-mail: takeuchi@chem.aoyama.ac.jp*

**Contents of the Supporting Information**

|                                                                                                                                                                    |         |
|--------------------------------------------------------------------------------------------------------------------------------------------------------------------|---------|
| 1. General Methods and Materials                                                                                                                                   | S2      |
| 2. Procedure for the Preparation of Tertiary Allenlyc Alcohol <b>1h</b>                                                                                            | S2      |
| 3. General Procedure for the Asymmetric Allenlyc Substitution of Racemic Tertiary and Secondary Allenlyc Alcohols <b>1</b> with Indoles <b>2</b> (Schemes 2 and 3) | S3      |
| 4. General Procedure for the Synthesis of Racemic Allenlylated Indoles                                                                                             | S3      |
| 5. Characterization of <b>3</b>                                                                                                                                    | S3–S14  |
| 6. General Procedure for the Asymmetric Allenlyc Substitution of Racemic Secondary Alcohols <b>1</b> with 7-Azaindoles <b>4</b> (Schemes 4)                        | S14–S15 |
| 7. Characterization of <b>5</b>                                                                                                                                    | S15–S17 |
| 8. Procedure for the Hydrogenation of Allenlylated Indole <b>3aa</b> (Scheme 5)                                                                                    | S17     |
| 9. Procedure for the Mo-Catalyzed Hydrosilylation of Allenlylated Indole <b>3aa</b> with Diphenylsilane (Scheme 5)                                                 | S17–S18 |
| 10. The data for X-ray crystal structure of compound (S)- <b>3ag</b> and (S)- <b>3ig</b>                                                                           | S19–S22 |
| 11. References                                                                                                                                                     | S23     |
| 12. <sup>1</sup> H, <sup>13</sup> C NMR and HPLC Charts                                                                                                            | S24–S78 |

## 1. General Methods and Materials

All anaerobic and moisture-sensitive manipulations were carried out with standard Schlenk techniques under predried argon.  $^1\text{H}$  and  $^{13}\text{C}$  NMR spectra were measured on JEOL ECX 500II spectrometers (500 MHz for  $^1\text{H}$ , 126 MHz for  $^{13}\text{C}$ ) and JEOL JNM-ECZL 400 spectrometers (400 MHz for  $^1\text{H}$ , 101 MHz for  $^{13}\text{C}$ ). Chemical shifts are reported in  $\delta$  (ppm) referenced to tetramethylsilane ( $\delta$  0.00) for  $^1\text{H}$  NMR and the residual peaks of  $\text{CDCl}_3$  ( $\delta$  77.00) for  $^{13}\text{C}$  NMR. The following abbreviations are used; s: singlet, d: doublet, t: triplet, q: quartet, m: multiplet. High-resolution mass spectra were obtained with a JEOL JMS-700 Mstation. Chiral High Performance Liquid Chromatography (HPLC) was performed on a Shimadzu system under the conditions given for each measurement. Optical rotations were measured on a JASCO P-2200. Single-crystal X-ray diffraction was collected on Rigaku XtaLAB Synergy DW diffractometer with a multi-layer mirror monochromatized  $\text{CuK}\alpha$  ( $\lambda = 1.54184 \text{ \AA}$ ) radiation and Rigaku RAXIS-RAPID imaging plate diffractometer with a graphite monochromatized  $\text{Mo K}\alpha$  ( $\lambda = 0.71069 \text{ \AA}$ ) radiation. The products were purified by column chromatography on 63-210 mesh silica gel (Kanto Kagaku; Silica Gel 60N). All solvents were dried and distilled before use by the usual procedures.  $[\text{Ir}(\text{cod})\text{Cl}]_2$ ,<sup>1</sup> (*R*)-**L**,<sup>2</sup> allenyl alcohols **1a-1f**,<sup>3</sup> **1g**,<sup>4</sup> **1i**,<sup>4</sup> **1j**,<sup>5</sup> **1k**,<sup>5</sup> **1l**,<sup>6</sup> **1m**,<sup>7</sup> 7-azaindole **4a**,<sup>8</sup> **4b**<sup>8</sup> were prepared as described in the literature. Indoles **2a-2i**, 7-azaindole **4c**, and  $\text{Yb}(\text{OTf})_3$  were purchased and used as received.

## 2. Procedure for the Preparation of Tertiary Allenyl Alcohol **1h**

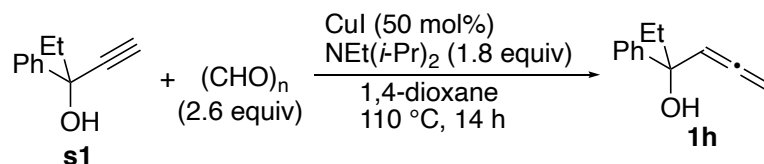

To a solution of **s1**<sup>9</sup> (582.2 mg, 3.634 mmol), formaldehyde (279.6 mg, 9.311 mmol), and  $\text{CuI}$  (348.7 mg, 1.831 mmol) in 1,4-dioxane (4 mL) was added diisopropylethylamine (652.3 mg, 6.446 mmol) at room temperature, and the mixture was stirred at  $110^\circ\text{C}$  for 14 h. The mixture was quenched by short column chromatography ( $\text{Et}_2\text{O}$ ), and concentrated on a rotary evaporator. The residue was subjected to column chromatography (silica gel, hexane/ethyl acetate = 8/2) to give compound **1h** (yellow liquid, 530.9 mg, 3.047 mmol, 84% yield).

$^1\text{H}$  NMR (500 MHz,  $\text{CDCl}_3$ )  $\delta$  7.49-7.43 (m, 2H), 7.34 (t,  $J = 7.7 \text{ Hz}$ , 2H), 7.27-7.22 (m, 1H), 5.57 (t,  $J = 6.6 \text{ Hz}$ , 1H), 4.99 (dd,  $J = 10.9, 6.6 \text{ Hz}$ , 1H), 4.94 (dd,  $J = 10.9, 6.9 \text{ Hz}$ , 1H), 2.08-2.04 (m, 1H), 2.01-1.86 (m, 2H), 0.84 (t,  $J = 7.5 \text{ Hz}$ , 3H);  $^{13}\text{C}\{\text{H}\}$  NMR (126 MHz,  $\text{CDCl}_3$ )  $\delta$  205.7, 145.8, 128.0, 126.8, 125.3, 99.5, 79.4, 75.1, 35.5, 8.1. HRMS (FAB)  $m/z$   $[\text{M}]^+$  calcd for  $\text{C}_{12}\text{H}_{14}\text{O}$  174.1039; found 174.1039.

### 3. General Procedure for the Asymmetric Allenylic Substitution of Racemic Tertiary and Secondary Allenylic Alcohols **1** with Indoles **2** (Schemes 2 and 3)

#### Representative Procedure for the Reaction of **1a** with **2a**

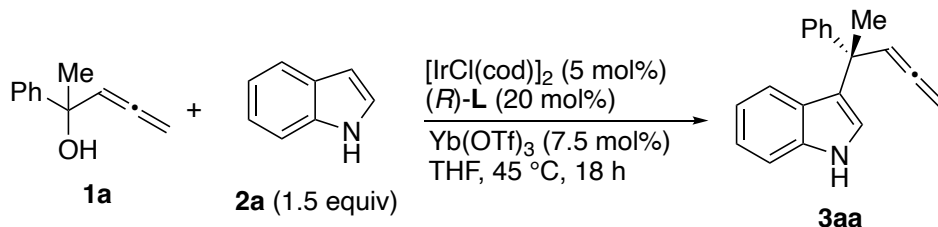

A mixture of  $[\text{Ir}(\text{cod})\text{Cl}]_2$  (13.4 mg, 0.0200 mmol), (*R*)-**L** (40.6 mg, 0.0800 mmol), **1a** (62.9 mg, 0.393 mmol) in THF (4.0 mL) was stirred at room temperature for 15 min. To the mixture was added **2a** (69.4 mg, 0.592 mmol) and  $\text{Yb}(\text{OTf})_3$  (18.6 mg, 0.0300 mmol), and the result was stirred at 45 °C for 18 h. After removal of the solvent on a rotary evaporator, the residue was subjected to column chromatography (silica gel, hexane/ $\text{Et}_2\text{O}$  = 90/10) to give compound **3aa** (94.8 mg, 0.366 mmol, 93% yield, 93% ee) as a brown solid.

### 4. General Procedure for the Synthesis of Racemic Allenylated Indoles

#### Representative Procedure for the Reaction of **1a** with **2a**

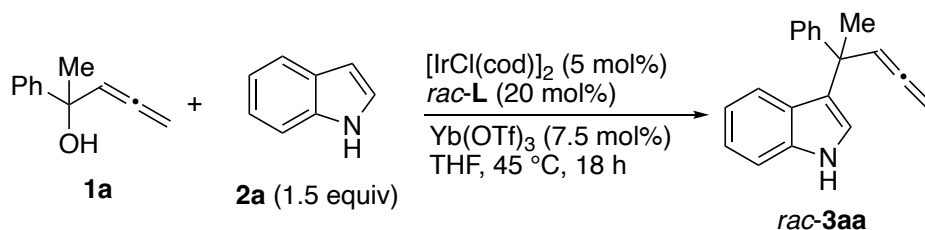

A mixture of  $[\text{Ir}(\text{cod})\text{Cl}]_2$  (13.4 mg, 0.0200 mmol), *rac*-**L** (40.7 mg, 0.0802 mmol), **1a** (63.2 mg, 0.394 mmol) in THF (4.0 mL) was stirred at room temperature for 15 min. To the mixture was added **2a** (70.9 mg, 0.605 mmol) and  $\text{Yb}(\text{OTf})_3$  (16.9 mg, 0.027 mmol), and the result was stirred at 45 °C for 18 h. After removal of the solvent on a rotary evaporator, the residue was subjected to column chromatography (silica gel, hexane/ $\text{Et}_2\text{O}$  = 90/10) to give compound *rac*-**3aa** (79.6 mg, 0.307 mmol, 78% yield) as a yellow oil.

## 5. Characterization of **3**

### 3-(2-Phenylpenta-3,4-dien-2-yl)-1H-indole (**3aa**)

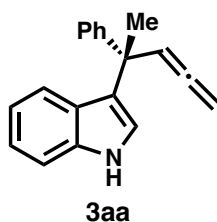

**3aa** was prepared according to general procedure using **1a** (62.9 mg, 0.393 mmol) and **2a** (69.4 mg, 0.592 mmol). The crude reaction mixture was purified by column chromatography using hexane/Et<sub>2</sub>O (90/10) to afford **3aa** (94.8 mg, 0.366 mmol, 93% yield, 93% ee) as a brown solid. The ee was measured by HPLC (Chiralpak AD-3 column, 0.5 mL/min, hexane/2-propanol = 95/5, 230 nm,  $t_1$  = 26.2 min (*minor*),  $t_2$  = 27.8 min (*major*));  $[\alpha]_D^{26}$  -58 ( $c$  1.03, CHCl<sub>3</sub>) for 93% ee. <sup>1</sup>H NMR (500 MHz, CDCl<sub>3</sub>)  $\delta$  7.97 (s, 1H), 7.39-7.33 (m, 3H), 7.30-7.24 (m, 2H), 7.21-7.16 (m, 1H), 7.15-7.10 (m, 2H), 7.07 (d,  $J$  = 7.5 Hz, 1H), 6.93-6.88 (m, 1H), 5.91 (t,  $J$  = 6.6 Hz, 1H), 4.85 (dd,  $J$  = 10.4, 6.3 Hz, 1H), 4.81 (dd,  $J$  = 10.3, 6.9 Hz, 1H), 1.84 (s, 3H); <sup>13</sup>C{H} NMR (101 MHz, CDCl<sub>3</sub>)  $\delta$  207.0, 147.9, 137.0, 128.0, 127.0, 126.0, 125.7, 123.6, 121.73, 121.66, 121.3, 119.0, 111.2, 99.7, 77.7, 42.9, 28.2. HRMS (FAB)  $m/z$  [M]<sup>+</sup> calcd for C<sub>19</sub>H<sub>17</sub>N 259.1356; found 259.1359.

#### **5-Methyl-3-(2-phenylpenta-3,4-dien-2-yl)-1H-indole (3ab)**

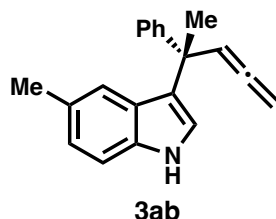

**3ab** was prepared according to general procedure using **1a** (63.4 mg, 0.396 mmol) and **2b** (79.7 mg, 0.608 mmol). The crude reaction mixture was purified by column chromatography using hexane/Et<sub>2</sub>O (90/10) to afford **3ab** (97.6 mg, 0.357 mmol, 90% yield, 90% ee) as a brown solid. The ee was measured by HPLC (Chiralpak AD-3, 1.0 mL/min, hexane/2-propanol = 99/1, 230 nm,  $t_1$  = 28.7 min (*minor*),  $t_2$  = 31.3 min (*major*)).  $[\alpha]_D^{26}$  -68 ( $c$  0.94, CHCl<sub>3</sub>) for 90% ee. <sup>1</sup>H NMR (400 MHz, CDCl<sub>3</sub>)  $\delta$  7.85 (s, 1H), 7.39-7.34 (m, 2H), 7.30-7.15 (m, 4H), 7.04 (d,  $J$  = 2.5 Hz, 1H), 6.95 (dd,  $J$  = 8.3, 1.3 Hz, 1H), 6.87 (s, 1H), 5.91 (t,  $J$  = 6.6 Hz, 1H), 4.85 (dd,  $J$  = 10.3, 6.6 Hz, 2H), 4.81 (dd,  $J$  = 10.3, 6.6 Hz, 1H), 2.28 (s, 3H), 1.83 (s, 3H); <sup>13</sup>C{H} NMR (101 MHz, CDCl<sub>3</sub>)  $\delta$  207.0, 147.9, 135.4, 128.2, 128.0, 127.0, 125.9, 123.4, 123.0, 121.8, 120.9, 110.8, 99.8, 77.6, 42.9, 28.2, 21.5. HRMS (FAB)  $m/z$  [M]<sup>+</sup> calcd for C<sub>20</sub>H<sub>19</sub>N 273.1512; found 273.1518.

#### **5-Methoxy-3-(2-phenylpenta-3,4-dien-2-yl)-1H-indole (3ac)**



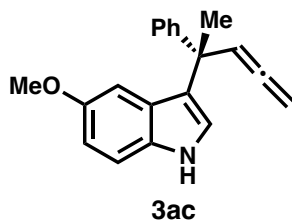

**3ac** was prepared according to general procedure using **1a** (64.0 mg, 0.399 mmol) and **2c** (88.4 mg, 0.601 mmol). The crude reaction mixture was purified by column chromatography using hexane/Et<sub>2</sub>O (90/10) to afford **3ac** (108.3 mg, 0.374 mmol, 94% yield, 90% ee) as a brown solid. The ee was measured by HPLC (Chiralcel OJ-H, 1.0 mL/min, hexane/2-propanol = 90/10, 230 nm, *t*<sub>1</sub> = 42.4 min (*major*), *t*<sub>2</sub> = 45.9 min (*minor*)). [ $\alpha$ ]<sup>27</sup><sub>D</sub> –63 (*c* 0.99, CHCl<sub>3</sub>) for 90% ee. <sup>1</sup>H NMR (500 MHz, CDCl<sub>3</sub>)  $\delta$  7.87 (s, 1H), 7.39-7.36 (m, 2H), 7.29-7.21 (m, 3H), 7.21-7.16 (m, 1H), 7.09 (d, *J* = 2.9 Hz, 1H), 6.78 (dd, *J* = 8.6, 2.3 Hz, 1H), 6.47 (d, *J* = 2.3 Hz, 1H), 5.89 (t, *J* = 6.6 Hz, 1H), 4.85 (dd, *J* = 10.3, 6.9 Hz, 1H), 4.82 (dd, *J* = 10.3, 6.9 Hz, 1H), 3.60 (s, 3H), 1.83 (s, 3H); <sup>13</sup>C{H} NMR (126 MHz, CDCl<sub>3</sub>)  $\delta$  207.0, 153.2, 147.7, 132.2, 128.0, 127.0, 126.2, 126.0, 123.3, 122.5, 111.74, 111.68, 103.4, 99.6, 77.6, 55.6, 42.8, 28.0. HRMS (FAB) *m/z* [M]<sup>+</sup> calcd for C<sub>20</sub>H<sub>19</sub>NO 289.1461; found 289.1461.

#### Methyl 3-(2-phenylpenta-3,4-dien-2-yl)-1H-indole-5-carboxylate (**3ad**)

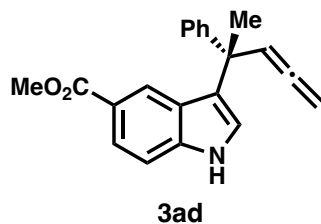

**3ad** was prepared according to general procedure using **1a** (61.6 mg, 0.384 mmol) and **2d** (105.2 mg, 0.601 mmol). The crude reaction mixture was purified by column chromatography using hexane/Et<sub>2</sub>O (70/30) to afford **3ad** (78.7 mg, 0.248 mmol, 65% yield, 96% ee) as a white solid. The ee was measured by HPLC (Chiralcel OD-H, 1.0 mL/min, hexane/2-propanol = 95/5, 230 nm, *t*<sub>1</sub> = 17.5 min (*major*), *t*<sub>2</sub> = 19.6 min (*minor*)). [ $\alpha$ ]<sup>27</sup><sub>D</sub> –59 (*c* 1.01, CHCl<sub>3</sub>) for 96% ee. <sup>1</sup>H NMR (500 MHz, CDCl<sub>3</sub>)  $\delta$  8.27 (s, 1H), 7.92 (s, 1H), 7.84 (d, *J* = 8.6 Hz, 1H), 7.41-7.30 (m, 3H), 7.27 (t, *J* = 7.5 Hz, 2H), 7.19 (t, *J* = 7.2 Hz, 1H), 7.09 (d, *J* = 2.3 Hz, 1H), 5.90 (t, *J* = 6.6 Hz, 1H), 4.85 (dd, *J* = 10.3, 6.9 Hz, 1H), 4.81 (dd, *J* = 10.3, 6.9 Hz, 1H), 3.83 (s, 3H), 1.86 (s, 3H); <sup>13</sup>C{H} NMR (126 MHz, CDCl<sub>3</sub>)  $\delta$  207.1, 168.1, 147.4, 139.7, 128.1, 126.9, 126.2, 125.5, 125.2, 124.3, 123.2, 123.0, 121.2, 110.9, 99.7, 77.9, 51.8, 43.0, 28.3. HRMS (FAB) *m/z* [M]<sup>+</sup> calcd for C<sub>21</sub>H<sub>19</sub>NO<sub>2</sub> 317.1410; found 317.1419.

#### 5-Bromo-3-(2-phenylpenta-3,4-dien-2-yl)-1H-indole (**3ae**)

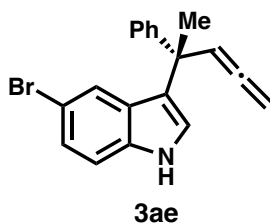

**3ae** was prepared according to general procedure using **1a** (63.3 mg, 0.395 mmol) and **2e** (118.3 mg, 0.603 mmol). The crude reaction mixture was purified by column chromatography using hexane/Et<sub>2</sub>O (60/40) to afford **3ae** (107.4 mg, 0.3175 mmol, 80% yield, 96% ee) as a white solid. The ee was measured by HPLC (Chiralpak AD-3, 1.0 mL/min, hexane/2-propanol = 95/5, 230 nm, *t*<sub>1</sub> = 10.8 min (*minor*), *t*<sub>2</sub> = 11.5 min (*major*)). [ $\alpha$ ]<sub>D</sub><sup>27</sup> −55 (*c* 0.97, CHCl<sub>3</sub>) for 96% ee. <sup>1</sup>H NMR (500 MHz, CDCl<sub>3</sub>)  $\delta$  8.00 (s, 1H), 7.34 (d, *J* = 8.0 Hz, 2H), 7.31–7.24 (m, 2H), 7.24–7.17 (m, 4H), 7.08 (d, *J* = 2.3 Hz, 1H), 5.84 (t, *J* = 6.6 Hz, 1H), 4.85 (dd, *J* = 10.3, 7.4 Hz, 1H), 4.81 (dd, *J* = 10.3, 6.9 Hz, 1H), 1.82 (s, 3H); <sup>13</sup>C{<sup>1</sup>H} NMR (126 MHz, CDCl<sub>3</sub>)  $\delta$  207.0, 147.3, 135.7, 128.1, 127.5, 126.9, 126.2, 124.7, 123.7, 123.6, 122.9, 112.6, 112.4, 99.5, 77.9, 42.9, 28.3. HRMS (FAB) *m/z* [M]<sup>+</sup> calcd for C<sub>19</sub>H<sub>16</sub>BrN 337.0461; found 337.0465.

#### **7-Methyl-3-(2-phenylpenta-3,4-dien-2-yl)-1H-indole (3af)**

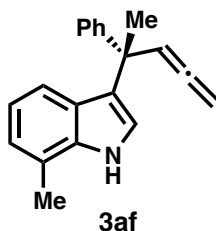

**3af** was prepared according to general procedure using **1a** (62.7 mg, 0.391 mmol) and **2f** (79.7 mg, 0.608 mmol). The crude reaction mixture was purified by column chromatography using hexane/Et<sub>2</sub>O (90/10) to afford **3af** (90.3 mg, 0.330 mmol, 84% yield, 91% ee) as a white solid. The ee was measured by HPLC (Chiralpak AD-3, 1.0 mL/min, hexane/2-propanol = 95/5, 230 nm, *t*<sub>1</sub> = 8.1 min (*minor*), *t*<sub>2</sub> = 9.0 min (*major*)). [ $\alpha$ ]<sub>D</sub><sup>27</sup> −40 (*c* 0.96, CHCl<sub>3</sub>) for 91% ee. <sup>1</sup>H NMR (400 MHz, CDCl<sub>3</sub>)  $\delta$  7.88 (s, 1H), 7.39–7.33 (m, 2H), 7.29–7.22 (m, 2H), 7.21–7.15 (m, 1H), 7.10 (d, *J* = 2.5 Hz, 1H), 6.96–6.89 (m, 2H), 6.83 (dd, *J* = 8.0, 7.0 Hz, 1H), 5.91 (t, *J* = 6.6 Hz, 1H), 4.85 (dd, *J* = 10.3, 6.6 Hz, 1H), 4.81 (dd, *J* = 10.2, 6.6 Hz, 1H), 2.47 (s, 3H), 1.83 (s, 3H); <sup>13</sup>C{<sup>1</sup>H} NMR (126 MHz, CDCl<sub>3</sub>)  $\delta$  207.0, 148.0, 136.6, 128.0, 127.0, 126.0, 125.3, 124.2, 122.3, 121.3, 120.2, 119.3, 119.1, 99.8, 77.6, 42.9, 28.2, 16.6. HRMS (FAB) *m/z* [M]<sup>+</sup> calcd for C<sub>20</sub>H<sub>19</sub>N 273.1512; found 273.1510.

#### **7-Bromo-3-(2-phenylpenta-3,4-dien-2-yl)-1H-indole (3ag)**

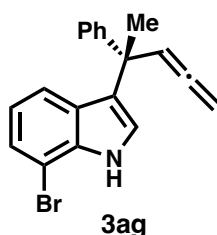

**3ag** was prepared according to general procedure using **1a** (57.6 mg, 0.360 mmol) and **2g** (117.6 mg, 0.600 mmol). The crude reaction mixture was purified by column chromatography using hexane/toluene (85/15) to afford **3ag** (83.1 mg, 0.246 mmol, 68% yield, 95% ee) as a yellow solid. The ee was measured by HPLC (Chiralpak AD-3, 0.5 mL/min, hexane/2-propanol = 95/5, 230 nm,  $t_1$  = 51.7 min (*minor*),  $t_2$  = 57.1 min (*major*)).  $[\alpha]_D^{27}$  -56 ( $c$  1.02, CHCl<sub>3</sub>) for 95% ee. <sup>1</sup>H NMR (400 MHz, CDCl<sub>3</sub>)  $\delta$  8.16 (s, 1H), 7.39–7.31 (m, 2H), 7.30–7.23 (m, 3H), 7.23–7.14 (m, 2H), 6.99 (d,  $J$  = 8.0 Hz, 1H), 6.78 (t,  $J$  = 7.8 Hz, 1H), 5.86 (t,  $J$  = 6.6 Hz, 1H), 4.85 (dd,  $J$  = 10.4, 6.7 Hz, 1H), 4.81 (dd,  $J$  = 10.4, 6.6 Hz, 1H), 1.83 (s, 3H); <sup>13</sup>C{H} NMR (101 MHz, CDCl<sub>3</sub>)  $\delta$  207.0, 147.6, 135.7, 128.1, 126.99, 126.97, 126.1, 125.1, 124.1, 122.2, 120.5, 120.3, 104.8, 99.5, 77.9, 43.1, 28.2. HRMS (FAB)  $m/z$  [M]<sup>+</sup> calcd for C<sub>19</sub>H<sub>16</sub>BrN 337.0461; found 337.0470.

### 2-Methyl-3-(2-phenylpenta-3,4-dien-2-yl)-1H-indole (3ah)

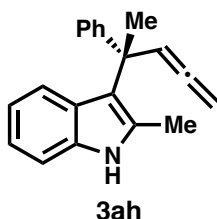

**3ah** was prepared according to general procedure using **1a** (61.8 mg, 0.386 mmol) and **2h** (79.3 mg, 0.605 mmol). The crude reaction mixture was purified by column chromatography using hexane/Et<sub>2</sub>O (90/10) to afford **3ah** (71.7 mg, 0.262 mmol, 68% yield, 20% ee) as a yellow solid. The ee was measured by HPLC (Chiralpak AD-3, 1.0 mL/min, hexane/2-propanol = 99/1, 230 nm,  $t_1$  = 24.7 min (*minor*),  $t_2$  = 26.0 min (*major*)).  $[\alpha]_D^{27}$  +8 ( $c$  0.98, CHCl<sub>3</sub>) for 20% ee. <sup>1</sup>H NMR (500 MHz, CDCl<sub>3</sub>)  $\delta$  7.67 (s, 1H), 7.42–7.36 (m, 2H), 7.30–7.22 (m, 3H), 7.22–7.16 (m, 1H), 7.11 (d,  $J$  = 8.0 Hz, 1H), 7.04 (td,  $J$  = 7.5, 1.3 Hz, 1H), 6.90–6.83 (m, 1H), 5.94 (td,  $J$  = 6.6, 1.9 Hz, 1H), 4.91–4.80 (m, 2H), 2.25 (s, 3H), 1.90 (d,  $J$  = 1.7 Hz, 3H); <sup>13</sup>C{H} NMR (101 MHz, CDCl<sub>3</sub>)  $\delta$  206.7, 149.3, 134.9, 131.2, 128.1, 127.9, 126.8, 125.8, 120.9, 120.5, 118.8, 117.3, 110.0, 101.4, 77.8, 43.8, 27.7, 14.6. HRMS (FAB)  $m/z$  [M]<sup>+</sup> calcd for C<sub>20</sub>H<sub>19</sub>N 273.1512; found 273.1510.

### 1-Methyl-3-(2-phenylpenta-3,4-dien-2-yl)-1H-indole (3ai)

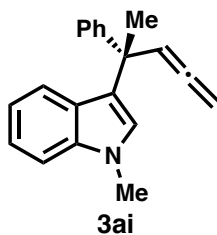

**3ai** was prepared according to general procedure using **1a** (63.0 mg, 0.393 mmol) and **2i** (76.6 mg, 0.584 mmol). The crude reaction mixture was purified by column chromatography using hexane/Et<sub>2</sub>O (90/10) to afford **3ai** (96.0 mg, 0.351 mmol, 89% yield, 93% ee) as a brown solid. The ee was measured by HPLC (Chiralcel OJ-H, 1.0 mL/min, hexane/2-propanol = 95/5, 230 nm,  $t_1$  = 11.6 min (*minor*),  $t_2$  = 15.3 min (*major*)).  $[\alpha]_D^{27}$  -55 ( $c$  1.04, CHCl<sub>3</sub>) for 93% ee. <sup>1</sup>H NMR (500 MHz, CDCl<sub>3</sub>)  $\delta$  7.39-7.35 (m, 2H), 7.30-7.23 (m, 3H), 7.21-7.13 (m, 2H), 7.06 (d,  $J$  = 8.1 Hz, 1H), 6.94 (s, 1H), 6.92-6.87 (m, 1H), 5.90 (t,  $J$  = 6.6 Hz, 1H), 4.85 (dd,  $J$  = 10.3, 6.9 Hz, 1H), 4.82 (dd,  $J$  = 10.3, 6.9 Hz, 1H), 3.78 (s, 3H), 1.83 (s, 3H); <sup>13</sup>C{H} NMR (126 MHz, CDCl<sub>3</sub>)  $\delta$  206.9, 148.1, 137.8, 128.0, 127.0, 126.5, 126.1, 126.0, 122.1, 121.4, 121.3, 118.5, 109.2, 99.9, 77.6, 42.9, 32.7, 28.3. HRMS (FAB)  $m/z$  [M]<sup>+</sup> calcd for C<sub>20</sub>H<sub>19</sub>N 273.1512; found 273.1513.

### **3-(2-(*p*-Tolyl)penta-3,4-dien-2-yl)-1*H*-indole (3ba)**

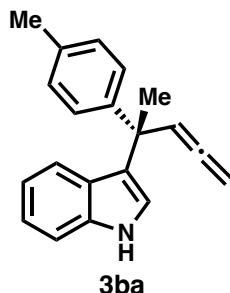

**3ba** was prepared according to general procedure using **1b** (65.9 mg, 0.378 mmol) and **2a** (71.9 mg, 0.614 mmol). The crude reaction mixture was purified by column chromatography using hexane/Et<sub>2</sub>O (90/10) to afford **3ba** (83.7 mg, 0.306 mmol, 81% yield, 87% ee) as a pale yellow oil. The ee was measured by HPLC (Chiralpak AD-3, 1.0 mL/min, hexane/2-propanol = 95/5, 230 nm,  $t_1$  = 9.8 min (*minor*),  $t_2$  = 10.8 min (*major*)).  $[\alpha]_D^{28}$  -26 ( $c$  0.99, CHCl<sub>3</sub>) for 87% ee. <sup>1</sup>H NMR (400 MHz, CDCl<sub>3</sub>)  $\delta$  7.95 (s, 1H), 7.34 (d,  $J$  = 8.1 Hz, 1H), 7.27-7.22 (m, 2H), 7.15-7.04 (m, 5H), 6.91 (ddd,  $J$  = 8.0, 7.1, 1.0 Hz, 1H), 5.89 (t,  $J$  = 6.6 Hz, 1H), 4.84 (dd,  $J$  = 10.2, 6.7 Hz, 1H), 4.80 (dd,  $J$  = 10.2, 6.6 Hz, 1H), 2.31 (s, 3H), 1.82 (s, 3H); <sup>13</sup>C{H} NMR (101 MHz, CDCl<sub>3</sub>)  $\delta$  206.9, 144.9, 137.1, 135.4, 128.7, 126.9, 125.8, 123.8, 121.7, 121.6, 121.4, 119.0, 111.1, 99.9, 77.6, 42.5, 28.2, 20.9. HRMS (FAB)  $m/z$  [M]<sup>+</sup> calcd for C<sub>20</sub>H<sub>19</sub>N 273.1512; found 273.1518.

### **3-(2-(4-Methoxyphenyl)penta-3,4-dien-2-yl)-1*H*-indole (3ca)**

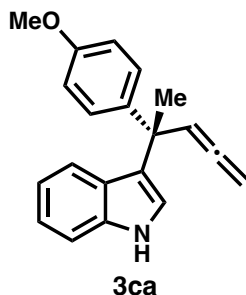

**3ca** was prepared according to general procedure using **1c** (74.5 mg, 0.392 mmol) and **2a** (70.6 mg, 0.603 mmol). The crude reaction mixture was purified by column chromatography using hexane/Et<sub>2</sub>O (80/20) to afford **3ca** (79.6 mg, 0.275 mmol, 70% yield, 84% ee) as a brown oil. The ee was measured by HPLC (Chiralpak AD-3, 1.0 mL/min, hexane/2-propanol = 95/5, 230 nm,  $t_1$  = 16.0 min (*minor*),  $t_2$  = 19.0 min (*major*)).  $[\alpha]^{27}_D -16$  ( $c$  0.99, CHCl<sub>3</sub>) for 84% ee. <sup>1</sup>H NMR (400 MHz, CDCl<sub>3</sub>)  $\delta$  7.95 (s, 1H), 7.33 (d,  $J$  = 8.1 Hz, 1H), 7.30-7.23 (m, 2H), 7.15-7.08 (m, 2H), 7.07 (d,  $J$  = 2.5 Hz, 1H), 6.91 (ddd,  $J$  = 8.0, 7.0, 1.0 Hz, 1H), 6.82-6.76 (m, 2H), 5.88 (t,  $J$  = 6.6 Hz, 1H), 4.84 (dd,  $J$  = 10.2, 6.6 Hz, 1H), 4.80 (dd,  $J$  = 10.1, 6.5 Hz, 1H), 3.77 (s, 3H), 1.82 (s, 3H); <sup>13</sup>C{<sup>1</sup>H} NMR (101 MHz, CDCl<sub>3</sub>)  $\delta$  206.9, 157.7, 140.1, 137.1, 128.1, 125.7, 123.8, 121.7, 121.6, 121.3, 119.0, 113.3, 111.2, 100.0, 77.6, 55.1, 42.3, 28.3. HRMS (FAB)  $m/z$  [ $M$ ]<sup>+</sup> calcd for C<sub>20</sub>H<sub>19</sub>NO 289.1461; found 289.1464.

#### Methyl 4-(2-(1*H*-indol-3-yl)penta-3,4-dien-2-yl)benzoate (**3da**)

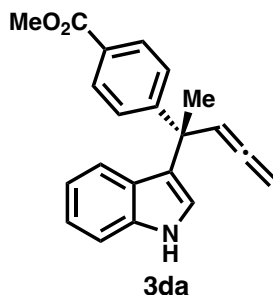

**3da** was prepared according to general procedure using **1d** (84.9 mg, 0.389 mmol) and **2a** (70.3 mg, 0.600 mmol). The crude reaction mixture was purified by column chromatography using hexane/EtOAc (90/10) to afford **3da** (104.7 mg, 0.330 mmol, 85% yield, 92% ee) as a yellow oil. The ee was measured by HPLC (Chiralpak AD-3, 1.0 mL/min, hexane/2-propanol = 90/10, 230 nm,  $t_1$  = 12.3 min (*minor*),  $t_2$  = 14.6 min (*major*)).  $[\alpha]^{27}_D +4$  ( $c$  0.16, CHCl<sub>3</sub>) for 92% ee. <sup>1</sup>H NMR (400 MHz, CDCl<sub>3</sub>)  $\delta$  8.06 (s, 1H), 7.96-7.89 (m, 2H), 7.46-7.40 (m, 2H), 7.35 (d,  $J$  = 8.2 Hz, 1H), 7.16-7.09 (m, 2H), 6.99 (d,  $J$  = 7.8 Hz, 1H), 6.93-6.86 (m, 1H), 5.89 (t,  $J$  = 6.6 Hz, 1H), 4.87 (dd,  $J$  = 10.4, 6.6 Hz, 1H), 4.82 (dd,  $J$  = 10.5, 6.6 Hz, 1H), 3.88 (s, 3H), 1.84 (s, 3H); <sup>13</sup>C{<sup>1</sup>H} NMR (101 MHz, CDCl<sub>3</sub>)  $\delta$  207.0, 167.2, 153.4, 137.0, 129.4, 127.8, 127.1, 125.4, 122.7, 121.8, 121.7, 120.9, 119.1, 111.3, 99.2, 78.0, 52.0, 43.1, 28.0. HRMS (FAB)  $m/z$  [ $M$ ]<sup>+</sup> calcd for C<sub>21</sub>H<sub>19</sub>NO<sub>2</sub> 317.1410; found 317.1417.

### 3-(2-(4-Bromophenyl)penta-3,4-dien-2-yl)-1H-indole (3ea)

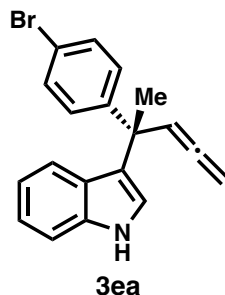

**3ea** was prepared according to general procedure using **1e** (95.1 mg, 0.398 mmol) and **2a** (71.0 mg, 0.606 mmol). The crude reaction mixture was purified by column chromatography using hexane/Et<sub>2</sub>O (90/10) to afford **3ea** (111.7 mg, 0.330 mmol, 83% yield, 92% ee) as a brown oil. The ee was measured by HPLC (Chiralpak AD-3, 1.0 mL/min, hexane/2-propanol = 95/5, 230 nm, *t*<sub>l</sub> = 11.6 min (*minor*), *t*<sub>2</sub> = 12.6 min (*major*)). [ $\alpha$ ]<sub>D</sub><sup>27</sup> -8 (*c* 1.02, CHCl<sub>3</sub>) for 92% ee. <sup>1</sup>H NMR (500 MHz, CDCl<sub>3</sub>)  $\delta$  7.98 (s, 1H), 7.35 (t, *J* = 7.2 Hz, 3H), 7.23 (t, *J* = 7.5 Hz, 2H), 7.14 (t, *J* = 7.7 Hz, 1H), 7.10 (d, *J* = 2.9 Hz, 1H), 7.05 (d, *J* = 8.0 Hz, 1H), 6.93 (t, *J* = 7.4 Hz, 1H), 5.85 (t, *J* = 6.6 Hz, 1H), 4.85 (dd, *J* = 10.3, 6.9 Hz, 1H), 4.81 (dd, *J* = 10.3, 6.3 Hz, 1H), 1.81 (s, 3H); <sup>13</sup>C{<sup>1</sup>H} NMR (101 MHz, CDCl<sub>3</sub>)  $\delta$  206.9, 147.0, 137.1, 131.0, 129.0, 125.5, 123.0, 121.9, 121.6, 121.1, 119.9, 119.2, 111.2, 99.3, 78.0, 42.7, 28.2. HRMS (FAB) *m/z* [*M*]<sup>+</sup> calcd for C<sub>19</sub>H<sub>16</sub>BrN 337.0461; found 337.0461.

### 3-(2-(Naphthalen-2-yl)penta-3,4-dien-2-yl)-1H-indole (3fa)

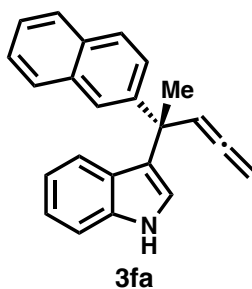

**3fa** was prepared according to general procedure using **1f** (84.2 mg, 0.400 mmol) and **2a** (70.3 mg, 0.600 mmol). The crude reaction mixture was purified by column chromatography using hexane/Et<sub>2</sub>O (90/10) to afford **3fa** (100.5 mg, 0.3248 mmol, 81% yield, 89% ee) as a brown solid. The ee was measured by HPLC (Chiralpak AD-3, 1.0 mL/min, hexane/2-propanol = 95/5, 230 nm, *t*<sub>l</sub> = 15.9 min (*minor*), *t*<sub>2</sub> = 18.6 min (*major*)). [ $\alpha$ ]<sub>D</sub><sup>26</sup> -5 (*c* 0.98, CHCl<sub>3</sub>) for 89% ee. <sup>1</sup>H NMR (500 MHz, CDCl<sub>3</sub>)  $\delta$  7.99 (s, 1H), 7.89 (s, 1H), 7.82–7.74 (m, 2H), 7.69 (d, *J* = 9.2 Hz, 1H), 7.47–7.39 (m, 3H), 7.35 (d, *J* = 8.1 Hz, 1H), 7.14 (d, *J* = 2.3 Hz, 1H), 7.10 (t, *J* = 7.7 Hz, 1H), 7.07 (d, *J* = 8.0 Hz, 1H), 6.84 (t, *J* = 7.5 Hz, 1H), 6.00 (t, *J* = 6.6 Hz, 1H), 4.92–4.80 (m, 2H), 1.93 (s, 3H); <sup>13</sup>C{<sup>1</sup>H} NMR (126 MHz, CDCl<sub>3</sub>)  $\delta$  207.1, 145.5, 137.1, 133.3,

132.0, 128.1, 127.6, 127.4, 126.3, 125.8, 125.7, 125.4, 124.8, 123.5, 121.8, 121.7, 121.2, 119.1, 111.2, 99.6, 77.8, 43.1, 28.0. HRMS (FAB)  $m/z$   $[M]^+$  calcd for  $C_{23}H_{19}N$  309.1512; found 309.1506.

### **3-(4-Methyldeca-1,2-dien-4-yl)-1H-indole (3ga)**

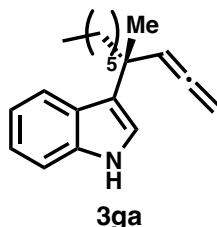

**3ga** was prepared according to general procedure using **1g** (63.1 mg, 0.375 mmol) and **2a** (69.7 mg, 0.595 mmol). The crude reaction mixture was purified by column chromatography using hexane/EtOAc (90/10) to afford **3ga** (43.4 mg, 0.162 mmol, 43% yield, 84% ee) as a yellow oil. The ee was measured by HPLC (Chiralcel OD-H, 0.5 mL/min, hexane/2-propanol = 95/5, 230 nm,  $t_r$  = 13.1 min (*minor*),  $t_r$  = 15.4 min (*major*)).  $[\alpha]_D^{27}$  -6 ( $c$  0.86,  $CHCl_3$ ) for 84% ee.  $^1H$  NMR (500 MHz,  $CDCl_3$ )  $\delta$  7.90 (s, 1H), 7.77 (d,  $J$  = 8.1 Hz, 1H), 7.35 (d,  $J$  = 8.0 Hz, 1H), 7.19-7.14 (m, 1H), 7.11-7.05 (m, 1H), 6.97 (d,  $J$  = 2.3 Hz, 1H), 5.48 (t,  $J$  = 6.6 Hz, 1H), 4.84 (dd,  $J$  = 9.8, 6.9 Hz, 1H), 4.81 (dd,  $J$  = 9.8, 6.3 Hz, 1H), 2.02-1.93 (m, 1H), 1.88-1.79 (m, 1H), 1.49 (s, 3H), 1.30-1.10 (m, 8H), 0.83 (t,  $J$  = 6.9 Hz, 3H);  $^{13}C\{H\}$  NMR (101 MHz,  $CDCl_3$ )  $\delta$  207.0, 137.0, 126.0, 123.7, 121.6, 121.2, 120.6, 118.9, 111.2, 100.1, 76.9, 40.9, 38.2, 31.8, 29.9, 25.8, 24.6, 22.7, 14.1. HRMS (FAB)  $m/z$   $[M]^+$  calcd for  $C_{19}H_{25}N$  267.1982; found 267.1975.

### **3-(3-Phenylhexa-4,5-dien-3-yl)-1H-indole (3ha)**

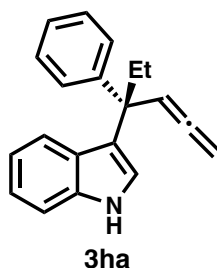

**3ha** was prepared according to general procedure using **1h** (68.0 mg, 0.390 mmol) and **2a** (70.7 mg, 0.603 mmol). The crude reaction mixture was purified by column chromatography using hexane/Et<sub>2</sub>O (90/10) to afford **3ha** (54.9 mg, 0.201 mmol, 51% yield, 29% ee) as a yellow oil. The ee was measured by HPLC (Chiralpak AD-3, 1.5 mL/min, hexane/2-propanol = 99/1, 230 nm,  $t_r$  = 20.3 min (*minor*),  $t_r$  = 22.3 min (*major*)).  $[\alpha]_D^{28}$  -23 ( $c$  0.49,  $CHCl_3$ ) for 29% ee.  $^1H$  NMR (500 MHz,  $CDCl_3$ )  $\delta$  7.99 (s, 1H), 7.33 (t,  $J$  = 7.7 Hz, 3H), 7.28-7.22 (m, 2H), 7.18 (t,  $J$  = 7.2 Hz, 1H), 7.14 (d,  $J$  = 2.3 Hz, 1H), 7.11 (t,  $J$  = 7.7 Hz, 1H), 7.00 (d,  $J$  = 8.0 Hz, 1H), 6.90-6.84 (m, 1H), 5.85 (t,  $J$  = 6.6 Hz, 1H), 4.77 (dd,  $J$  = 10.3, 6.6 Hz,

1H), 4.73 (dd,  $J = 10.3, 6.3$  Hz, 1H), 2.39 (dq,  $J = 14.9, 7.1$  Hz, 1H), 2.30 (dq,  $J = 14.9, 7.0$  Hz, 1H), 0.75 (t,  $J = 7.2$  Hz, 3H);  $^{13}\text{C}\{^1\text{H}\}$  NMR (101 MHz,  $\text{CDCl}_3$ )  $\delta$  207.3, 146.1, 136.9, 127.9, 127.8, 126.1, 125.9, 122.24, 122.23, 121.7, 121.5, 118.9, 111.0, 98.2, 77.4, 47.3, 31.9, 9.6. HRMS (FAB)  $m/z$   $[\text{M}]^+$  calcd for  $\text{C}_{20}\text{H}_{19}\text{N}$  273.1512; found 273.1512.

### **3-(1-Phenylbuta-2,3-dien-1-yl)-1H-indole (3ia)**

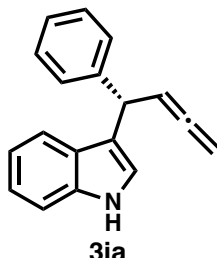

**3ia** was prepared according to general procedure using **1i** (57.8 mg, 0.395 mmol) and **2a** (71.2 mg, 0.608 mmol). The crude reaction mixture was purified by column chromatography using hexane/ $\text{Et}_2\text{O}$  (90/10) to afford **3ia** (82.7 mg, 0.337 mmol, 85% yield, 98% ee) as a white solid. The ee was measured by HPLC (Chiralpak AD-3, 1.0 mL/min, hexane/2-propanol = 99/1, 230 nm,  $t_1 = 49.8$  min (*minor*),  $t_2 = 53.3$  min (*major*)).  $[\alpha]_D^{27} +45$  ( $c$  1.03,  $\text{CHCl}_3$ ) for 98% ee.  $^1\text{H}$  NMR (500 MHz,  $\text{CDCl}_3$ )  $\delta$  7.97 (s, 1H), 7.43 (d,  $J = 8.1$  Hz, 1H), 7.37-7.26 (m, 5H), 7.21 (t,  $J = 7.2$  Hz, 1H), 7.17 (t,  $J = 7.4$  Hz, 1H), 7.03 (t,  $J = 7.4$  Hz, 1H), 6.95 (d,  $J = 2.3$  Hz, 1H), 5.68 (q,  $J = 6.9$  Hz, 1H), 4.98 (d,  $J = 8.1$  Hz, 1H), 4.77-4.66 (m, 2H);  $^{13}\text{C}\{^1\text{H}\}$  NMR (126 MHz,  $\text{CDCl}_3$ )  $\delta$  208.5, 143.4, 136.6, 128.3, 128.1, 126.7, 126.4, 122.3, 122.1, 119.8, 119.4, 118.9, 111.1, 94.0, 76.3, 42.9. HRMS (FAB)  $m/z$   $[\text{M}]^+$  calcd for  $\text{C}_{18}\text{H}_{15}\text{N}$  245.1199; found 245.1198.

### **3-(1-(4-Bromophenyl)buta-2,3-dien-1-yl)-1H-indole (3ja)**

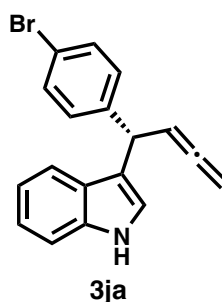

**3ja** was prepared according to general procedure using **1j** (90.0 mg, 0.400 mmol) and **2a** (70.7 mg, 0.603 mmol). The crude reaction mixture was purified by column chromatography using hexane/ $\text{Et}_2\text{O}$  (90/10) to afford **3ja** (111.2 mg, 0.3430 mmol, 86% yield, 97% ee) as a white solid. The ee was measured by HPLC (Chiralpak AD-3, 0.5 mL/min, hexane/2-propanol = 95/5, 230 nm,  $t_1 = 16.8$  min (*minor*),  $t_2 = 18.1$  min (*major*)).  $[\alpha]_D^{27} +47$  ( $c$  0.93,  $\text{CHCl}_3$ ) for 97% ee.  $^1\text{H}$  NMR (500 MHz,  $\text{CDCl}_3$ )  $\delta$  7.99 (s, 1H), 7.42-7.32 (m, 4H), 7.23-7.14 (m, 3H), 7.06-7.01 (m, 1H), 6.96 (d,  $J = 1.7$  Hz, 1H), 5.64 (q,  $J = 7.1$  Hz, 1H), 4.96-4.90 (m, 1H), 4.76-



4.67 (m, 2H);  $^{13}\text{C}\{^1\text{H}\}$  NMR (126 MHz,  $\text{CDCl}_3$ )  $\delta$  208.5, 142.4, 136.6, 131.3, 129.9, 126.5, 122.3, 122.2, 120.2, 119.6, 119.5, 118.3, 111.1, 93.6, 76.7, 42.3. HRMS (FAB)  $m/z$   $[\text{M}]^+$  calcd for  $\text{C}_{18}\text{H}_{14}\text{BrN}$  323.0304; found 323.0300.

### **3-(1-(Naphthalen-2-yl)buta-2,3-dien-1-yl)-1H-indole (3ka)**

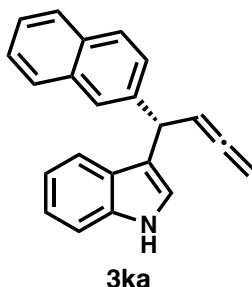

**3ka** was prepared according to general procedure using **1k** (76.7 mg, 0.391 mmol) and **2a** (70.7 mg, 0.603 mmol). The crude reaction mixture was purified by column chromatography using hexane/ $\text{Et}_2\text{O}$  (9/1) to afford **3ka** (94.5 mg, 0.320 mmol, 82% yield, 98% ee) as a pale brown solid. The ee was measured by HPLC (Chiralpak AD-3 column, 1.0 mL/min, hexane/2-propanol = 95/5, 230 nm,  $t_1$  = 24.1 min (*major*),  $t_2$  = 25.8 min (*minor*));  $[\alpha]^{20}_{\text{D}} +68$  ( $c$  0.96,  $\text{CHCl}_3$ ) for 98% ee.  $^1\text{H}$  NMR (500 MHz,  $\text{CDCl}_3$ )  $\delta$  7.98 (s, 1H), 7.83-7.73(m, 4H), 7.48-7.39 (m, 4H), 7.35 (d,  $J$  = 8.0 Hz, 1H), 7.16 (t,  $J$  = 7.5 Hz, 1H), 7.01 (t,  $J$  = 7.4 Hz, 1H), 6.98-6.95 (m, 1H), 5.76 (q,  $J$  = 7.1 Hz, 1H), 5.15 (d,  $J$  = 7.5 Hz, 1H), 4.78-4.68 (m, 2H);  $^{13}\text{C}\{^1\text{H}\}$  NMR (126 MHz,  $\text{CDCl}_3$ )  $\delta$  208.6, 140.9, 136.6, 133.5, 132.4, 127.8, 127.6, 127.0, 126.8, 126.2, 125.8, 125.4, 122.4, 122.1, 119.8, 119.4, 118.8, 111.1, 93.9, 76.4, 43.0; HRMS (FAB)  $m/z$   $[\text{M}]^+$  calcd for  $\text{C}_{22}\text{H}_{17}\text{N}$  295.1356; found 295.1358.

### **3-(1-(Benzo[*b*]thiophen-2-yl)buta-2,3-dien-1-yl)-1H-indole (3la)**

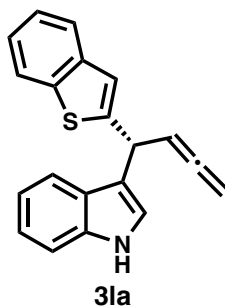

**3la** was prepared according to general procedure using **1l** (80.1 mg, 0.396 mmol) and **2a** (70.5 mg, 0.602 mmol). The crude reaction mixture was purified by column chromatography using hexane/ $\text{Et}_2\text{O}$  (90/10) to afford **3la** (94.2 mg, 0.313 mmol, 79% yield, 98% ee) as a brown solid. The ee was measured by HPLC (Chiralcel OD-H, 1.0 mL/min, hexane/2-propanol = 95/5, 230 nm,  $t_1$  = 17.4 min (*major*),  $t_2$  = 19.2 min (*minor*)).  $[\alpha]^{27}_{\text{D}} +49$  ( $c$  1.04,  $\text{CHCl}_3$ ) for 98% ee.  $^1\text{H}$  NMR (400 MHz,  $\text{CDCl}_3$ )  $\delta$  7.98 (s, 1H), 7.72 (d,  $J$  = 8.3 Hz, 1H), 7.63 (d,  $J$  = 7.2 Hz, 1H),

7.54 (d,  $J$  = 8.0 Hz, 1H), 7.34 (d,  $J$  = 8.2 Hz, 1H), 7.31-7.15 (m, 3H), 7.15-7.02 (m, 3H), 5.76 (dt,  $J$  = 7.9, 6.6 Hz, 1H), 5.32-5.24 (m, 1H), 4.810 (d,  $J$  = 6.6 Hz, 1H), 4.805 (d,  $J$  = 6.6 Hz, 1H);  $^{13}\text{C}\{\text{H}\}$  NMR (101 MHz,  $\text{CDCl}_3$ )  $\delta$  208.3, 148.8, 139.8, 139.6, 136.4, 126.3, 124.0, 123.6, 123.1, 122.3, 122.22, 122.17, 121.1, 119.57, 119.56, 117.7, 111.2, 93.5, 77.1, 39.1. HRMS (FAB)  $m/z$   $[\text{M}]^+$  calcd for  $\text{C}_{20}\text{H}_{15}\text{NS}$  301.0920; found 301.0913.

### **7-Bromo-3-(1-phenylbuta-2,3-dien-1-yl)-1H-indole (3ig)**

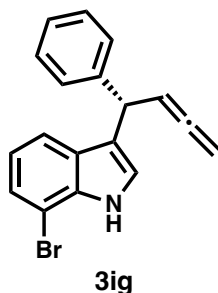

**3ig** was prepared according to general procedure using **1i** (59.1 mg, 0.404 mmol) and **2g** (114.7 mg, 0.585 mmol). The crude reaction mixture was purified by column chromatography using hexane/toluene (85/15) to afford **3ig** (108.2 mg, 0.3337 mmol, 83% yield, 99% ee) as a white solid. The ee was measured by HPLC (Chiralpak AD-3, 1.0 mL/min, hexane/2-propanol = 95/5, 230 nm,  $t_1$  = 9.8 min (*major*),  $t_2$  = 10.9 min (*minor*)).  $[\alpha]_D^{16} +49$  ( $c$  0.99,  $\text{CHCl}_3$ ) for 99% ee.  $^1\text{H}$  NMR (500 MHz,  $\text{CDCl}_3$ )  $\delta$  8.15 (s, 1H), 7.35 (d,  $J$  = 8.1 Hz, 1H), 7.33-7.27 (m, 5H), 7.24-7.19 (m, 1H), 7.01 (d,  $J$  = 1.7 Hz, 1H), 6.91 (t,  $J$  = 8.0 Hz, 1H), 5.66 (dt,  $J$  = 8.0, 6.6 Hz, 1H), 4.98-4.92 (m, 1H), 4.77-4.67 (m, 2H);  $^{13}\text{C}\{\text{H}\}$  NMR (101 MHz,  $\text{CDCl}_3$ )  $\delta$  208.5, 143.0, 135.2, 128.3, 128.1, 127.9, 126.5, 124.4, 122.9, 120.5, 120.1, 119.0, 104.6, 93.7, 76.5, 43.0. HRMS (FAB)  $m/z$   $[\text{M}]^+$  calcd for  $\text{C}_{18}\text{H}_{14}\text{BrN}$  323.0304; found 323.0312.

## **6. General Procedure for the Asymmetric Allenylic Substitution of Racemic Secondary Alcohols **1** with 7-Azaindoles **4** (Schemes 4)**

### **Representative Procedure for the Reaction of **1i** with **4a****

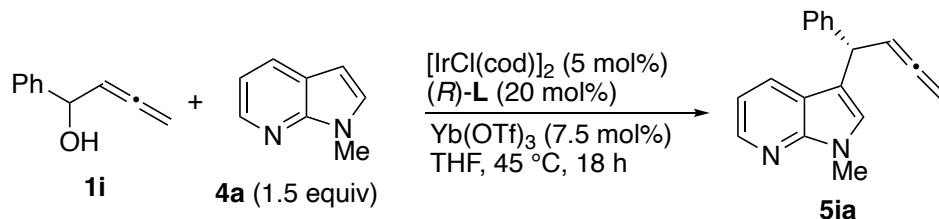

A mixture of  $[\text{Ir}(\text{cod})\text{Cl}]_2$  (13.6 mg, 0.0203 mmol), (*R*)-**L** (40.9 mg, 0.0806 mmol), **1i** (57.7 mg, 0.395 mmol) in THF (4.0 mL) was stirred at room temperature for 15 min. To the mixture was added **4a** (78.5 mg, 0.594 mmol) and  $\text{Yb}(\text{OTf})_3$  (18.8 mg, 0.0303 mmol), and the result was stirred at 45 °C for 18 h. After removal of the solvent on a rotary evaporator, the residue was subjected to column chromatography (silica gel, toluene/EtOAc = 95/5) to give

compound **5ia** (74.4 mg, 0.286 mmol, 72% yield, 99% ee).

## 7. Characterization of 5

### 1-Methyl-3-(1-phenylbuta-2,3-dien-1-yl)-1H-pyrrolo[2,3-b]pyridine (5ia)

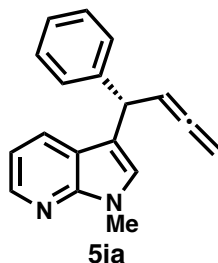

**5ia** was prepared according to general procedure using **1i** (57.7 mg, 0.395 mmol) and **4a** (78.5 mg, 0.594 mmol). The crude reaction mixture was purified by column chromatography using toluene/EtOAc = 95/5 to afford **5ia** (74.4 mg, 0.286 mmol, 72% yield, 99% ee) as a brown oil. The ee was measured by HPLC (Chiralcel OD-H, 1.0 mL/min, hexane/2-propanol = 99/1, 230 nm,  $t_1$  = 10.4 min (*major*),  $t_2$  = 11.6 min (*minor*)).  $[\alpha]_D^{28} +24$  ( $c$  0.98, CHCl<sub>3</sub>) for 99% ee. <sup>1</sup>H NMR (500 MHz, CDCl<sub>3</sub>)  $\delta$  8.29 (dd,  $J$  = 4.6, 1.7 Hz, 1H), 7.66 (dd,  $J$  = 7.5, 1.4 Hz, 1H), 7.31 (d,  $J$  = 4.6 Hz, 4H), 7.28–7.21 (m, 1H), 6.95 (dd,  $J$  = 8.0, 4.9 Hz, 1H), 6.90 (s, 1H), 5.68–5.61 (m, 1H), 4.97–4.91 (m, 1H), 4.77–4.68 (m, 2H), 3.84 (s, 3H); <sup>13</sup>C{<sup>1</sup>H} NMR (126 MHz, CDCl<sub>3</sub>)  $\delta$  208.4, 148.2, 143.0, 142.8, 128.4, 128.1, 128.0, 127.0, 126.6, 119.6, 115.8, 115.0, 93.7, 76.5, 43.1, 31.1. HRMS (FAB)  $m/z$  [M+H]<sup>+</sup> calcd for C<sub>18</sub>H<sub>17</sub>N<sub>2</sub> 261.1386; found 261.1384.

### 5-Chloro-1-methyl-3-(1-phenylbuta-2,3-dien-1-yl)-1H-pyrrolo[2,3-b]pyridine (5ib)

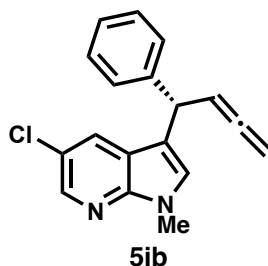

**5ib** was prepared according to general procedure using **1i** (56.3 mg, 0.385 mmol) and **4b** (99.9 mg, 0.600 mmol). The crude reaction mixture was purified by column chromatography using toluene/EtOAc (100/1) to afford **5ib** (68.7 mg, 0.233 mmol, 61% yield, 99% ee) as a dark brown oil. The ee was measured by HPLC (Chiralcel OZ-H, 1.0 mL/min, hexane/2-propanol = 99/1, 230 nm,  $t_1$  = 5.4 min (*minor*),  $t_2$  = 6.2 min (*major*)).  $[\alpha]_D^{29} +4.8$  ( $c$  0.99, CHCl<sub>3</sub>) for 99% ee. <sup>1</sup>H NMR (500 MHz, CDCl<sub>3</sub>)  $\delta$  8.22 (d,  $J$  = 2.3 Hz, 1H), 7.63 (d,  $J$  = 2.6 Hz, 1H), 7.36–7.22 (m, 5H), 6.91 (s, 1H), 5.61 (q,  $J$  = 7.1 Hz, 1H), 4.91–4.85 (m, 1H), 4.79–4.68 (m, 2H), 3.81 (s, 3H); <sup>13</sup>C{<sup>1</sup>H} NMR (126 MHz, CDCl<sub>3</sub>)  $\delta$  208.4, 146.5, 142.5, 141.4,

128.6, 128.5, 128.0, 127.1, 126.8, 123.0, 120.1, 115.5, 93.5, 76.8, 42.8, 31.2. HRMS (FAB)  $m/z$   $[M+H]^+$  calcd for  $C_{18}H_{16}ClN_2$  295.0997; found 295.0998.

**3-(1-Phenylbuta-2,3-dien-1-yl)-1H-pyrrolo[2,3-b]pyridine (5ic)**

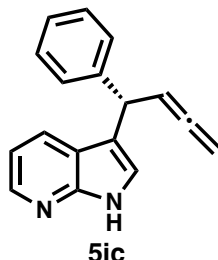

**5ic** was prepared according to general procedure using **1i** (58.3 mg, 0.399 mmol) and **4c** (71.4 mg, 0.604 mmol). The crude reaction mixture was purified by column chromatography using toluene/EtOAc (8/2) to afford **5ic** (59.1 mg, 0.240 mmol, 60% yield, >99.5% ee) as a brown oil. The ee was measured by HPLC (Chiralcel OD-H, 1.0 mL/min, hexane/2-propanol = 99/1, 230 nm,  $t_1$  = 52.8 min (*major*),  $t_2$  = 58.7 min (*minor*)).  $[\alpha]_D^{29} +37$  ( $c$  1.01,  $CHCl_3$ ) for >99.5% ee.  $^1H$  NMR (500 MHz,  $CDCl_3$ )  $\delta$  10.9 (s, 1H), 8.27 (dd,  $J$  = 4.6, 1.7 Hz, 1H), 7.70 (dd,  $J$  = 7.5, 1.5 Hz, 1H), 7.35-7.27 (m, 4H), 7.27-7.20 (m, 1H), 7.11 (s, 1H), 6.98 (dd,  $J$  = 7.5, 4.9 Hz, 1H), 5.67 (q,  $J$  = 6.9 Hz, 1H), 4.99-4.93 (m, 1H), 4.77-4.66 (m, 2H);  $^{13}C\{^1H\}$  NMR (126 MHz,  $CDCl_3$ )  $\delta$  208.5, 149.3, 143.0, 142.4, 128.4, 128.3, 128.1, 126.6, 123.1, 119.6, 117.1, 115.3, 93.7, 76.5, 43.1. HRMS (FAB)  $m/z$   $[M+H]^+$  calcd for  $C_{17}H_{15}N_2$  247.1230; found 247.1228.

**1-Methyl-3-(1-(naphthalen-1-yl)buta-2,3-dien-1-yl)-1H-pyrrolo[2,3-b]pyridine (5ma)**

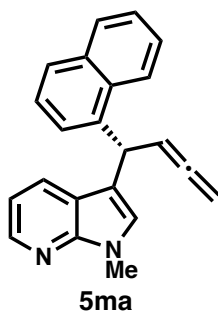

**5ma** was prepared according to general procedure using **1m** (78.5 mg, 0.400 mmol) and **4a** (79.7 mg, 0.603 mmol). The crude reaction mixture was purified by column chromatography using toluene/EtOAc (99/1) to afford **5ma** (87.9 mg, 0.283 mmol, 71% yield, 98% ee) as a dark brown oil. The ee was measured by HPLC (Chiralcel OD-H, 1.0 mL/min, hexane/2-propanol = 99/1, 230 nm,  $t_1$  = 12.5 min (*minor*),  $t_2$  = 14.4 min (*major*)).  $[\alpha]_D^{29} -16$  ( $c$  1.00,  $CHCl_3$ ) for 98% ee.  $^1H$  NMR (500 MHz,  $CDCl_3$ )  $\delta$  8.30 (dd,  $J$  = 5.2, 1.4 Hz, 1H), 8.15-8.10 (m, 1H), 7.90-7.85 (m, 1H), 7.76 (dd,  $J$  = 7.5, 1.7 Hz, 1H), 7.68 (dd,  $J$  = 8.0, 1.7 Hz, 1H), 7.49-7.37 (m, 4H), 6.94 (dd,  $J$  = 7.5, 4.9 Hz, 1H), 6.81 (s, 1H), 5.77-5.69 (m, 2H), 4.71-4.61

(m, 2H), 3.79 (s, 3H);  $^{13}\text{C}\{^1\text{H}\}$  NMR (126 MHz,  $\text{CDCl}_3$ )  $\delta$  208.8, 148.3, 142.9, 138.6, 134.0, 131.5, 128.8, 127.9, 127.6, 127.4, 125.9, 125.5, 125.44, 125.37, 123.9, 119.7, 115.5, 115.0, 93.6, 76.7, 38.8, 31.1. HRMS (FAB)  $m/z$   $[\text{M}+\text{H}]^+$  calcd for  $\text{C}_{22}\text{H}_{19}\text{N}_2$  311.1543; found 311.1540.

## 8. Procedure for the Hydrogenation of Allenylated Indole **3aa** (Scheme 5)

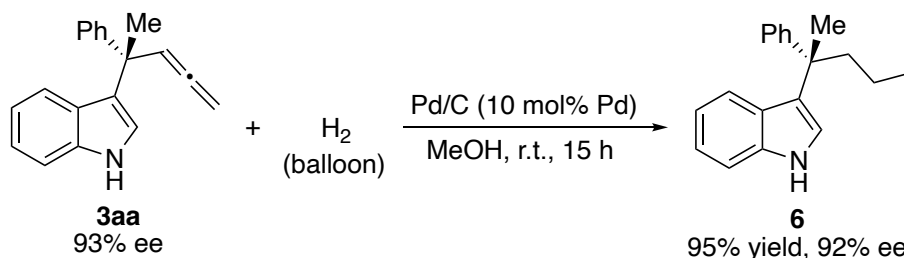

To  $\text{Pd/C}$  (63.6 mg, 5%, 0.0298 mmol Pd) was added the solution of **3aa** (77.7 g, 0.300 mmol, 93% ee) in  $\text{MeOH}$  (3.0 mL) at room temperature. After the mixture was stirred under a hydrogen atmosphere at room temperature for 15 h,  $\text{Pd/C}$  was filtered off by celite. The filtrate was concentrated on a rotary evaporator. The residue was subjected to short column chromatography (silica gel,  $\text{Et}_2\text{O}$ ) to give **6** (74.8 mg, 0.284 mmol, 95% yield, 92% ee) as a red-purple oil.

**Compound 6:** The ee was measured by HPLC (OJ-H column, 1.0 mL/min, hexane/2-propanol = 95/5, 230 nm,  $t_1$  = 31.4 min (*minor*),  $t_2$  = 35.4 min (*major*));  $[\alpha]_D^{26} +10$  ( $c$  0.49,  $\text{CHCl}_3$ ) for 92% ee.  $^1\text{H}$  NMR (500 MHz,  $\text{CDCl}_3$ )  $\delta$  7.89 (s, 1H), 7.34-7.27 (m, 3H), 7.25-7.19 (m, 2H), 7.17-7.11 (m, 1H), 7.11-7.05 (m, 2H), 6.99 (d,  $J$  = 8.0 Hz, 1H), 6.87-6.81 (m, 1H), 2.25-2.17 (m, 1H), 2.12-2.03 (m, 1H), 1.70 (s, 3H), 1.23-1.04 (m, 2H), 0.85 (t,  $J$  = 7.5 Hz, 3H);  $^{13}\text{C}\{^1\text{H}\}$  NMR (126 MHz,  $\text{CDCl}_3$ )  $\delta$  149.1, 137.0, 127.8, 126.9, 126.1, 125.4, 125.1, 121.5, 121.3, 121.2, 118.8, 110.9, 44.0, 42.4, 27.5, 17.9, 14.8; HRMS (FAB)  $m/z$   $[\text{M}]^+$  calcd for  $\text{C}_{19}\text{H}_{21}\text{N}$  263.1669; found 263.1674.

## 9. Procedure for the Mo-Catalyzed Hydrosilylation of Allenylated Indole **3aa** with Diphenylsilane (Scheme 5)<sup>10</sup>

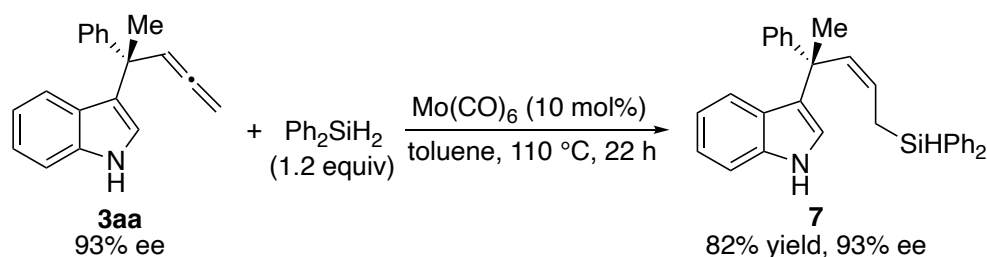

To a solution of **3aa** (78.0 mg, 0.301 mmol, 93% ee) and  $\text{Mo(CO)}_6$  (8.2 mg, 0.031 mmol) in toluene (0.3 mL) was added diphenylsilane (67.3 mg, 0.365 mmol) at room

temperature. After the mixture was stirred at 110 °C for 22 h, it was filtered with Celite (Et<sub>2</sub>O), and the filtrate was concentrated on a rotary evaporator. The residue was subjected to column chromatography (silica gel, hexane/EtOAc = 9/1) to give compound **7** (108.6 mg, 0.2448 mmol, 82% yield, 93% ee) as a pale pink oil.

**Compound 7:** The ee was measured by HPLC (Chiralpak AD-3 column, 1.0 mL/min, hexane/2-propanol = 99/1, 230 nm, *t*<sub>1</sub> = 55.6 min (*minor*), *t*<sub>2</sub> = 60.0 min (*major*)); [ $\alpha$ ]<sup>26</sup><sub>D</sub> –17 (*c* 0.98, CHCl<sub>3</sub>) for 93% ee. <sup>1</sup>H NMR (500 MHz, CDCl<sub>3</sub>)  $\delta$  7.79 (s, 1H), 7.40-7.26 (m, 14H), 7.26-7.19 (m, 2H), 7.18-7.11 (m, 2H), 6.99-6.94 (m, 1H), 6.75 (d, *J* = 2.9 Hz, 1H), 6.09-6.03 (m, 1H), 5.53 (dt, *J* = 11.5, 8.7 Hz, 1H), 4.51 (t, *J* = 3.7 Hz, 1H), 1.90 (s, 3H), 1.70 (ddd, *J* = 8.6, 3.7, 1.6 Hz, 2H); <sup>13</sup>C{<sup>1</sup>H} NMR (126 MHz, CDCl<sub>3</sub>)  $\delta$  148.6, 137.3, 137.2, 135.1, 133.89, 133.87, 129.5, 127.9, 127.8, 127.6, 126.2, 125.7, 125.6, 124.5, 122.2, 121.8, 121.7, 118.9, 111.1, 44.8, 30.0, 14.7; HRMS (FAB) *m/z* [M]<sup>+</sup> calcd for C<sub>31</sub>H<sub>29</sub>NSi 443.2064; found 443.2070.

## 10. The data for X-ray crystal structure of compounds (*S*)-**3ag** and (*S*)-**3ig**

### Data for the X-ray crystal structure of compound (*S*)-**3ag**

A colorless block crystal (size = 0.26×0.21×0.15 mm) of **3ag** was coated with paraffin oil and mounted in a loop. The ORTEP drawing of **3ag** is shown in Figure S1. All of the C, N and Br atoms were refined anisotropically. All of the hydrogen atoms were refined isotropically. Further details of the crystal structure of **3ag** have been deposited at the Cambridge Crystallographic Centre (deposition number: CCDC 2382169). The data can be obtained free of charge via [www.ccdc.cam.ac.uk/data\\_request/cif/](http://www.ccdc.cam.ac.uk/data_request/cif/).

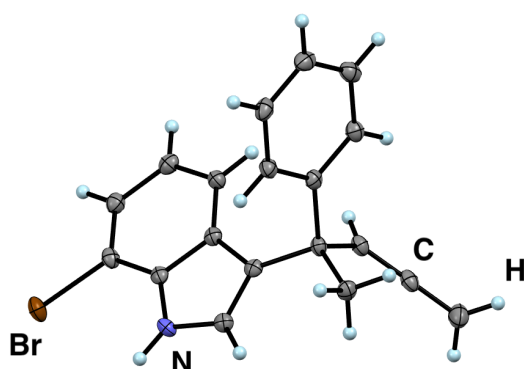

**Figure S1.** ORTEP illustration of **3ag** with thermal ellipsoids drawn at the 50% probability level.

**Table S1.** Crystal data of **3ag**.

|                      |                                                                                                                |
|----------------------|----------------------------------------------------------------------------------------------------------------|
| Empirical Formula    | C <sub>19</sub> H <sub>16</sub> BrN                                                                            |
| Formula Weight       | 338.24                                                                                                         |
| Crystal Color, Habit | colorless, block                                                                                               |
| Crystal Dimensions   | 0.26 × 0.21 × 0.15 mm                                                                                          |
| Crystal System       | monoclinic                                                                                                     |
| Lattice Type         | Primitive                                                                                                      |
| Lattice Parameters   | a = 8.52880(10) Å<br>b = 6.05890(10) Å<br>c = 14.83580(10) Å<br>β = 90.3240(10) °<br>V = 766.63 Å <sup>3</sup> |
| Space Group          | P2 <sub>1</sub> (#4)                                                                                           |
| Z value              | 2                                                                                                              |
| D <sub>calc</sub>    | 1.465 g/cm <sup>3</sup>                                                                                        |
| F <sub>000</sub>     | 344                                                                                                            |
| μ(CuKα)              | 35.742 cm <sup>-1</sup>                                                                                        |

**Table S2.** Intensity Measurements.

|                             |                                                                                                           |
|-----------------------------|-----------------------------------------------------------------------------------------------------------|
| Diffractometer              | XtaLAB Synergy                                                                                            |
| Radiation                   | CuK $\alpha$ ( $\lambda = 1.54184$ Å)<br>multi-layer mirror monochromated                                 |
| Temperature                 | 100.0 K                                                                                                   |
| No. of Reflections Measured | Total: 15912<br>Unique: 3272 ( $R_{\text{int}} = 0.0233$ )<br>Parsons quotients (Flack x parameter): 1444 |
| Corrections                 | Lorentz-polarization<br>Absorption<br>(trans. factors: 0.340 – 1.000)                                     |

**Table S3.** Structure Solution and Refinement.

|                                             |                                                                                                                  |
|---------------------------------------------|------------------------------------------------------------------------------------------------------------------|
| Structure Solution                          | Direct Methods (SHELXT Version 2018/2)                                                                           |
| Refinement                                  | Full-matrix least-squares on $F^2$ (SHELXL Version 2018/3)                                                       |
| Function Minimized                          | $\Sigma w (F_o^2 - F_c^2)^2$                                                                                     |
| Least Squares Weights                       | $w = 1/[\sigma^2(F_o^2) + (0.0246 \cdot P)^2 + 0.2482 \cdot P]$<br>where $P = (\text{Max}(F_o^2, 0) + 2F_c^2)/3$ |
| Anomalous Dispersion                        | All non-hydrogen atoms                                                                                           |
| No. Observations (All reflections)          | 3272                                                                                                             |
| Residuals: R1 ( $I > 2.00\sigma(I)$ )       | 0.0176                                                                                                           |
| Residuals: R (All reflections)              | 0.0176                                                                                                           |
| Residuals: wR2 (All reflections)            | 0.0467                                                                                                           |
| Goodness of Fit Indicator                   | 1.082                                                                                                            |
| Flack parameter (Persons' quotients = 1444) | -0.019(7)                                                                                                        |
| Max Shift/Error in Final Cycle              | 0.001                                                                                                            |
| Maximum peak in Final Diff. Map             | 0.172 e $^-/\text{\AA}^3$                                                                                        |
| Minimum peak in Final Diff. Map             | -0.216 e $^-/\text{\AA}^3$                                                                                       |



### Data for the X-ray crystal structure of compound (*S*)-**3ig**

A colorless block crystal (size = 0.6 × 0.5 × 0.3 mm) of **3ig** was coated with paraffin oil and mounted in a loop. The ORTEP drawing of **3ig** is shown in Figure S2. All of the C, N and Br atoms were refined anisotropically. All of the hydrogen atoms were refined isotropically. Further details of the crystal structure of **3ig** have been deposited at the Cambridge Crystallographic Centre (deposition number: CCDC 2382171). The data can be obtained free of charge via [www.ccdc.cam.ac.uk/data\\_request/cif/](http://www.ccdc.cam.ac.uk/data_request/cif/).

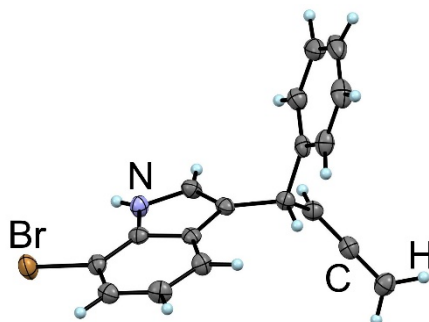

**Figure S2.** ORTEP illustration of **3ig** with thermal ellipsoids drawn at the 50% probability level.

**Table S4.** Crystal data of **3ig**.

|                      |                                                                                                      |
|----------------------|------------------------------------------------------------------------------------------------------|
| Empirical Formula    | C <sub>18</sub> H <sub>14</sub> BrN                                                                  |
| Formula Weight       | 324.22                                                                                               |
| Crystal Color, Habit | colorless, block                                                                                     |
| Crystal Dimensions   | 0.6 × 0.5 × 0.3 mm                                                                                   |
| Crystal System       | monoclinic                                                                                           |
| Lattice Type         | Primitive                                                                                            |
| Lattice Parameters   | a = 5.754(3) Å<br>b = 8.657(5) Å<br>c = 14.376(7) Å<br>β = 94.56(2) °<br>V = 713.8(7) Å <sup>3</sup> |
| Space Group          | P2 <sub>1</sub> (#4)                                                                                 |
| Z value              | 2                                                                                                    |
| D <sub>calc</sub>    | 1.508 g/cm <sup>3</sup>                                                                              |
| F <sub>000</sub>     | 328.00                                                                                               |
| μ(MoKα)              | 28.763 cm <sup>-1</sup>                                                                              |

**Table S5.** Intensity Measurements.

|                             |                                                                                                          |
|-----------------------------|----------------------------------------------------------------------------------------------------------|
| Diffractometer              | R-AXIS RAPID                                                                                             |
| Radiation                   | MoK $\alpha$ ( $\lambda = 0.71075$ Å)<br>graphite monochromated                                          |
| Temperature                 | 173.0 K                                                                                                  |
| No. of Reflections Measured | Total: 7048<br>Unique: 3257 ( $R_{\text{int}} = 0.0538$ )<br>Parsons quotients (Flack x parameter): 1257 |
| Corrections                 | Lorentz-polarization<br>Absorption<br>(trans. factors: 0.330 – 0.422)                                    |

**Table S6.** Structure Solution and Refinement.

|                                             |                                                                                                                  |
|---------------------------------------------|------------------------------------------------------------------------------------------------------------------|
| Structure Solution                          | Direct Methods (SHELXT Version 2018/2)                                                                           |
| Refinement                                  | Full-matrix least-squares on $F^2$ (SHELXL Version 2018/3)                                                       |
| Function Minimized                          | $\Sigma w (F_o^2 - F_c^2)^2$                                                                                     |
| Least Squares Weights                       | $w = 1/[\sigma^2(F_o^2) + (0.0239 \cdot P)^2 + 0.0000 \cdot P]$<br>where $P = (\text{Max}(F_o^2, 0) + 2F_c^2)/3$ |
| Anomalous Dispersion                        | All non-hydrogen atoms                                                                                           |
| No. Observations (All reflections)          | 3257                                                                                                             |
| Residuals: R1 ( $I > 2.00\sigma(I)$ )       | 0.0309                                                                                                           |
| Residuals: R (All reflections)              | 0.0331                                                                                                           |
| Residuals: wR2 (All reflections)            | 0.0703                                                                                                           |
| Goodness of Fit Indicator                   | 0.996                                                                                                            |
| Flack parameter (Persons' quotients = 1257) | –0.024(9)                                                                                                        |
| Max Shift/Error in Final Cycle              | 0.001                                                                                                            |
| Maximum peak in Final Diff. Map             | 0.43 e $^-/\text{\AA}^3$                                                                                         |
| Minimum peak in Final Diff. Map             | –0.46 e $^-/\text{\AA}^3$                                                                                        |

## 11. References

1. R. H. Crabtree, J. M. Quirk, H. Felkin and T. Fillebeen-Khan, An Efficient Synthesis of  $[\text{Ir}(\text{cod})\text{Cl}]_2$  and Its Reaction with  $\text{PMe}_2\text{Ph}$  to Give  $\text{FAC-}[\text{IrH}(\text{PMe}_2\text{C}_6\text{H}_4)(\text{PMe}_2\text{Ph})_3]$ , *Synth. React. Inorg. Met.-Org. Chem.*, 1982, **12**, 407-413.
2. C. Defieber, M. A. Ariger, P. Moriel and E. M. Carreira, Iridium-Catalyzed Synthesis of Primary Allylic Amines from Allylic Alcohols: Sulfamic Acid as Ammonia Equivalent, *Angew. Chem., Int. Ed.*, 2007, **46**, 3139-3143.
3. M. Isomura, D. A. Petrone and E. M. Carreira, Coordination-Induced Stereocontrol over Carbocations: Asymmetric Reductive Deoxygenation of Racemic Tertiary Alcohols, *J. Am. Chem. Soc.*, 2019, **141**, 4738-4748.
4. H. Luo and S. Ma, CuI-Catalyzed Synthesis of Functionalized Terminal Allenes from 1-Alkynes, *Eur. J. Org. Chem.*, 2013, 3041-3048
5. D. A. Petrone, M. Isomura, I. Franzoni, S. L. Rössler and E. M. Carreira, Allenylic Carbonates in Enantioselective Iridium-Catalyzed Alkylations, *J. Am. Chem. Soc.*, 2018, **140**, 4697-4704.
6. A. Guðmundsson, K. P. J. Gustafson, B. K. Mai, B. Yang, F. Himo and J.-E. Bäckvall Efficient Formation of 2,3-Dihydrofurans via Iron-Catalyzed Cycloisomerization of  $\alpha$ -Allenols, *ACS Catal.*, 2018, **8**, 12-16.
7. S. Asai, M. Kato, Y. Monguchi, H. Sajiki and Y. Sawama, Phosphate-Mediated Enyne Synthesis from Allenols, *ChemistrySelect*, 2017, **2**, 876-878.
8. P. Kannaboina, K. Anilkumar, S. Aravind, R. A. Vishwakarma and P. Das, Direct C-2 Arylation of 7-Azaindoles: Chemoselective Access to Multiarylated Derivatives *Org. Lett.*, 2013, **15**, 5718-5721.
9. X. Huang and N. Jiao, Brønsted Acid Mediated Nitrogenation of Propargylic Alcohols: An Efficient Approach to Alkenyl Nitriles, *Org. Biomol. Chem.*, 2014, **12**, 4324-4328.
10. S. Asako, S. Ishikawa and K. Takai, Synthesis of Linear Allylsilanes via Molybdenum-Catalyzed Regioselective Hydrosilylation of Allenes, *ACS Catal.*, 2016, **6**, 3387-3395.

## 12. $^1\text{H}$ and $^{13}\text{C}$ NMR Charts and HPLC Charts

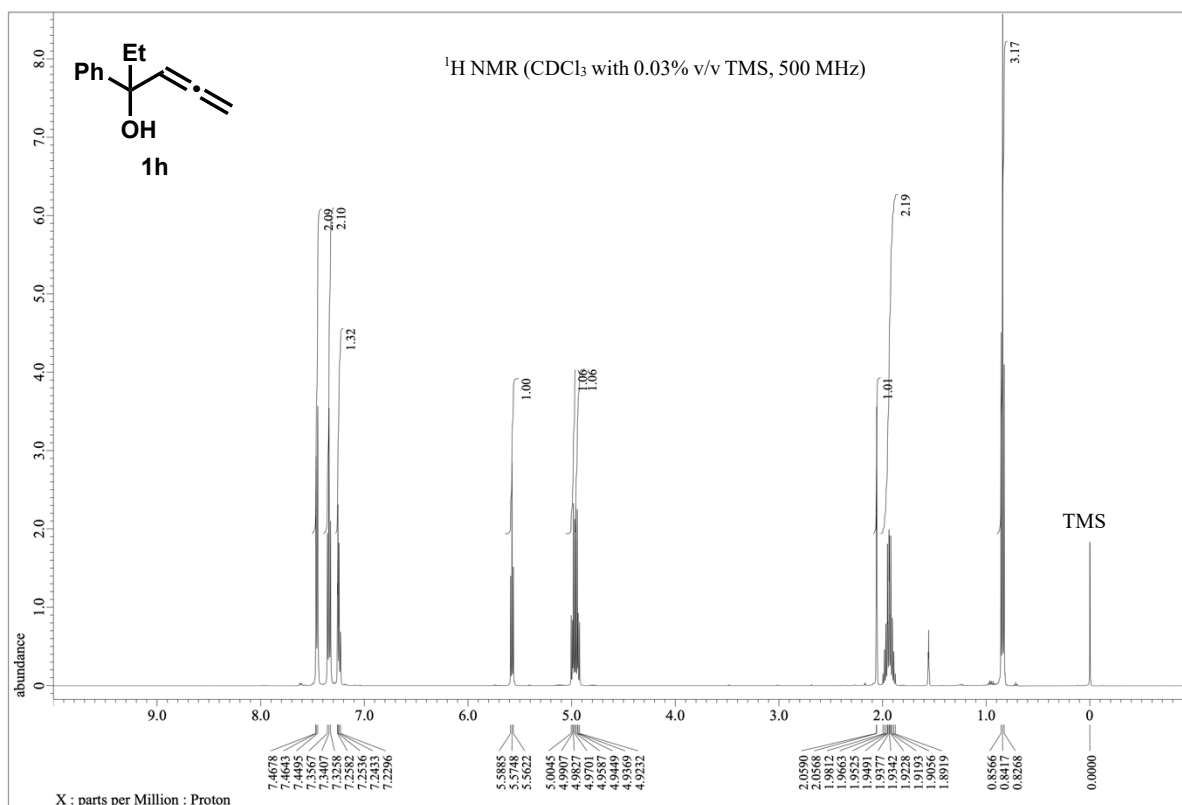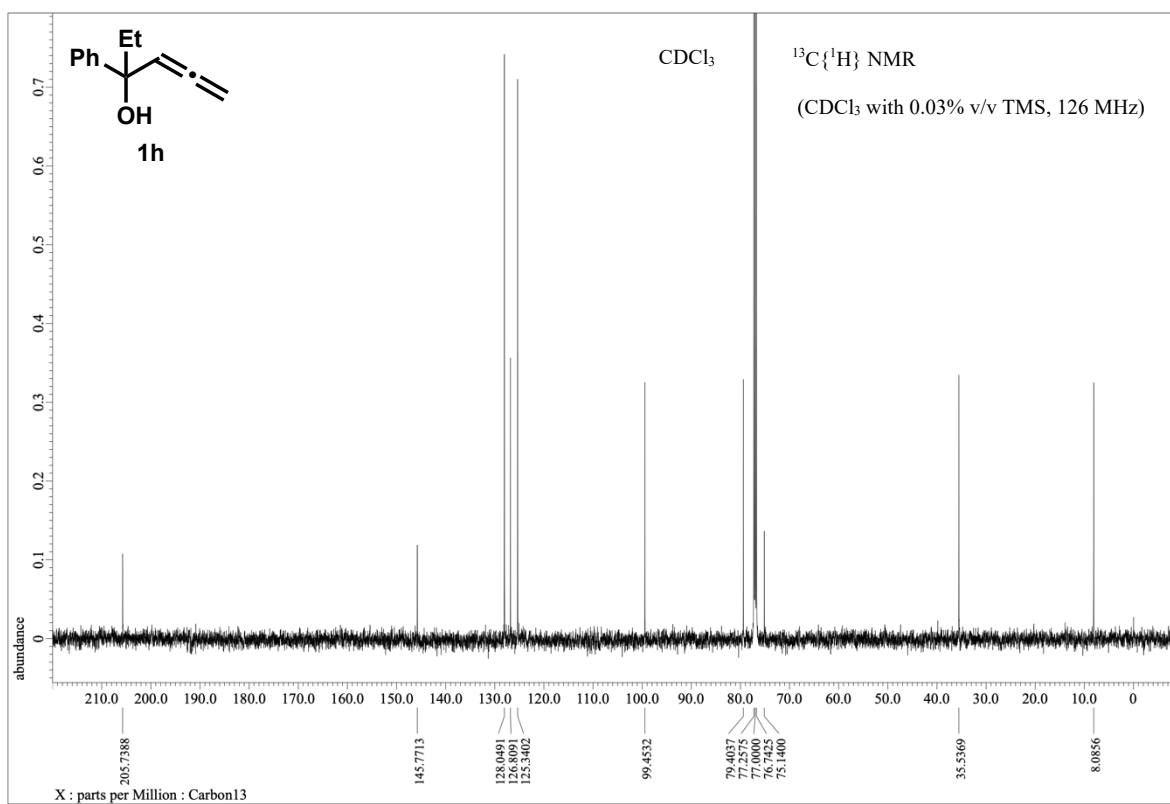

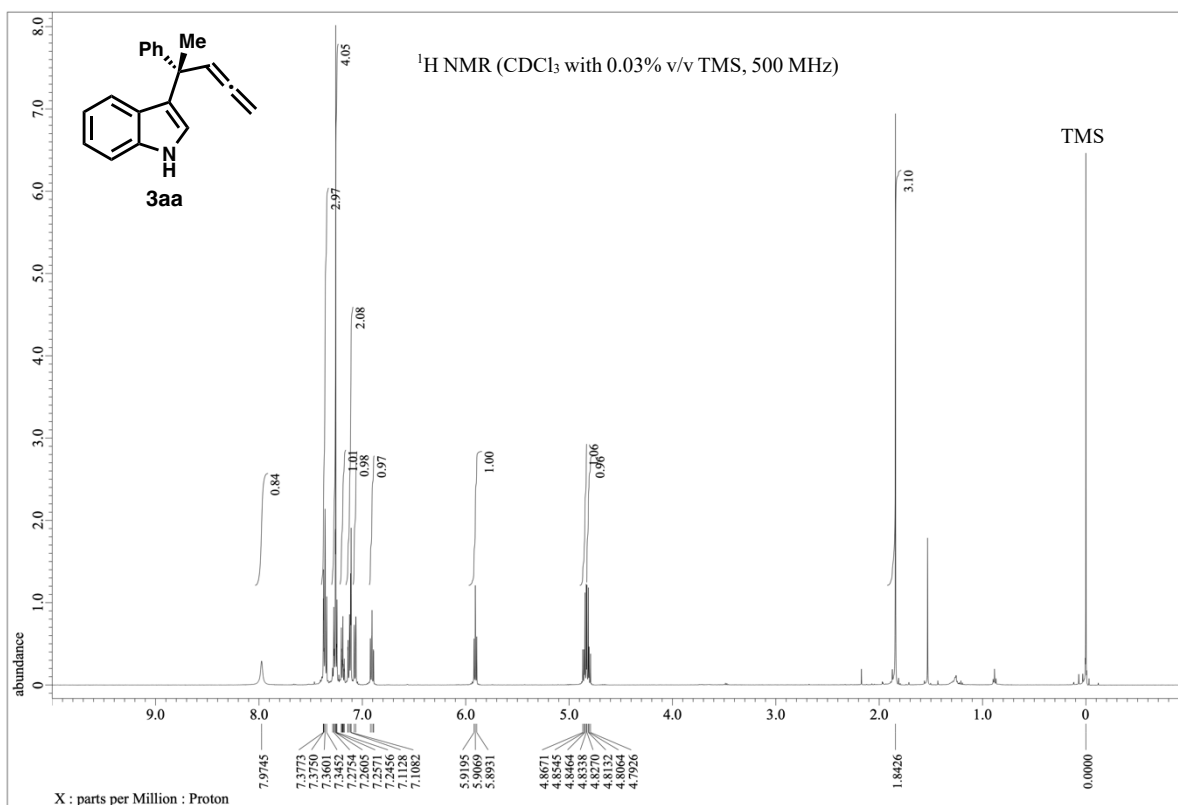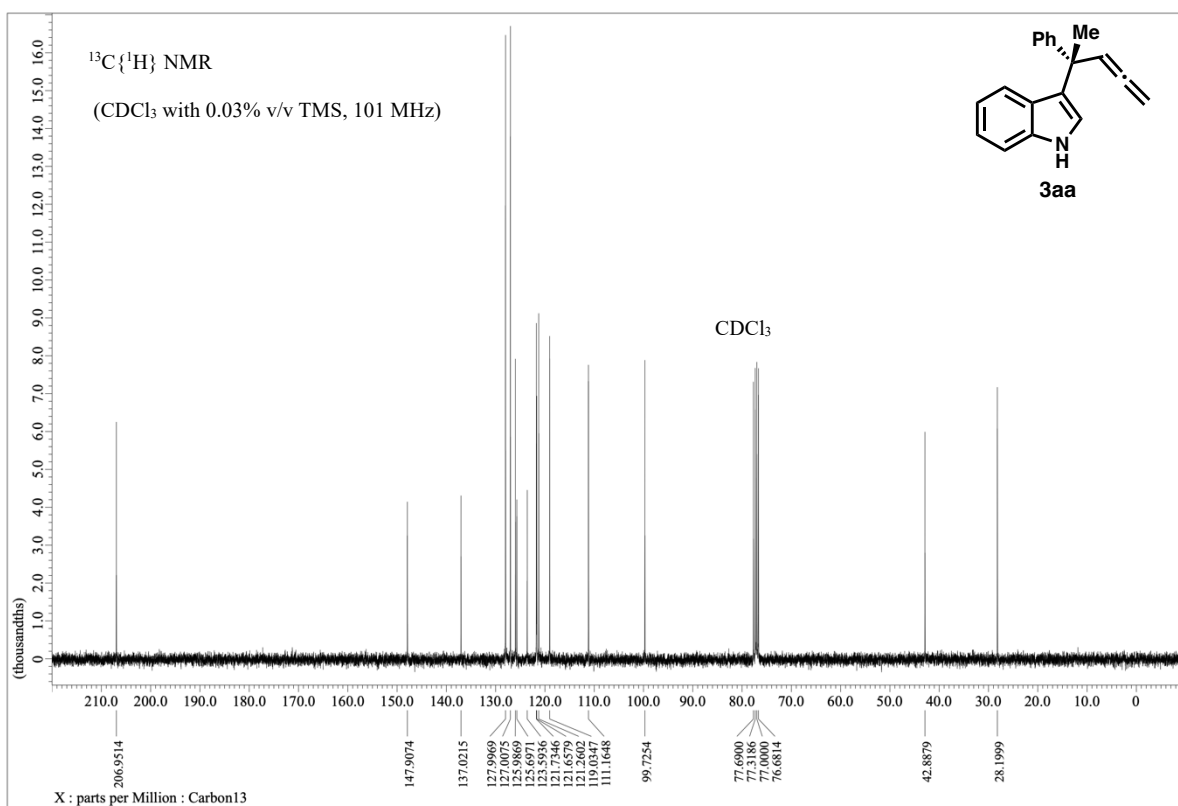

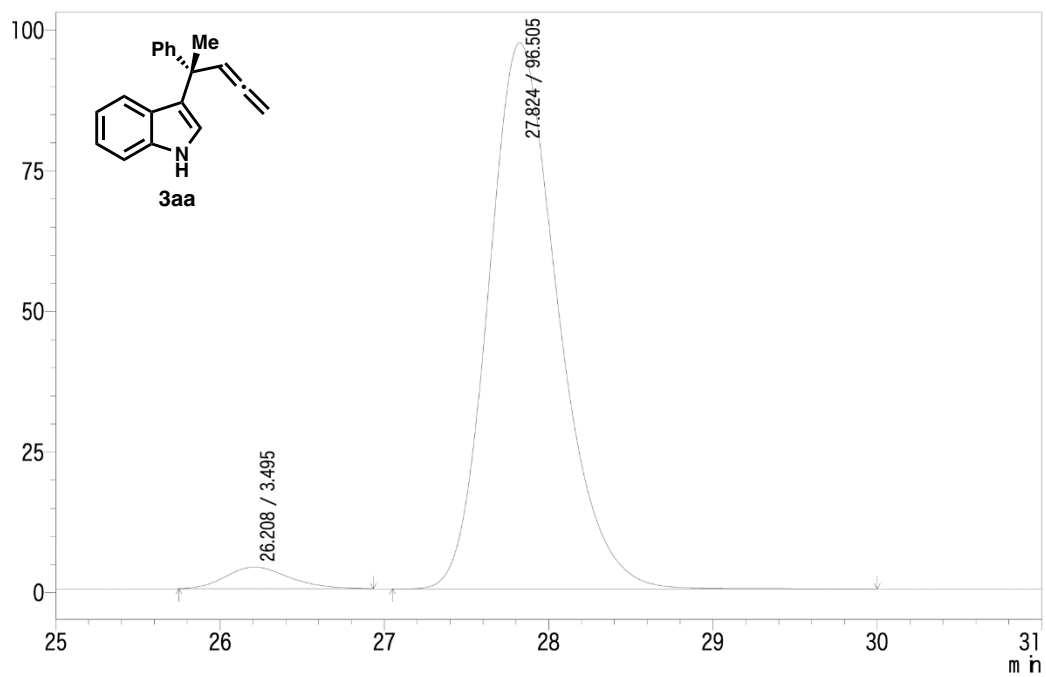

| peak# | retention time | area%   |
|-------|----------------|---------|
| 1     | 26.208         | 3.495   |
| 2     | 27.824         | 96.505  |
| Total |                | 100.000 |

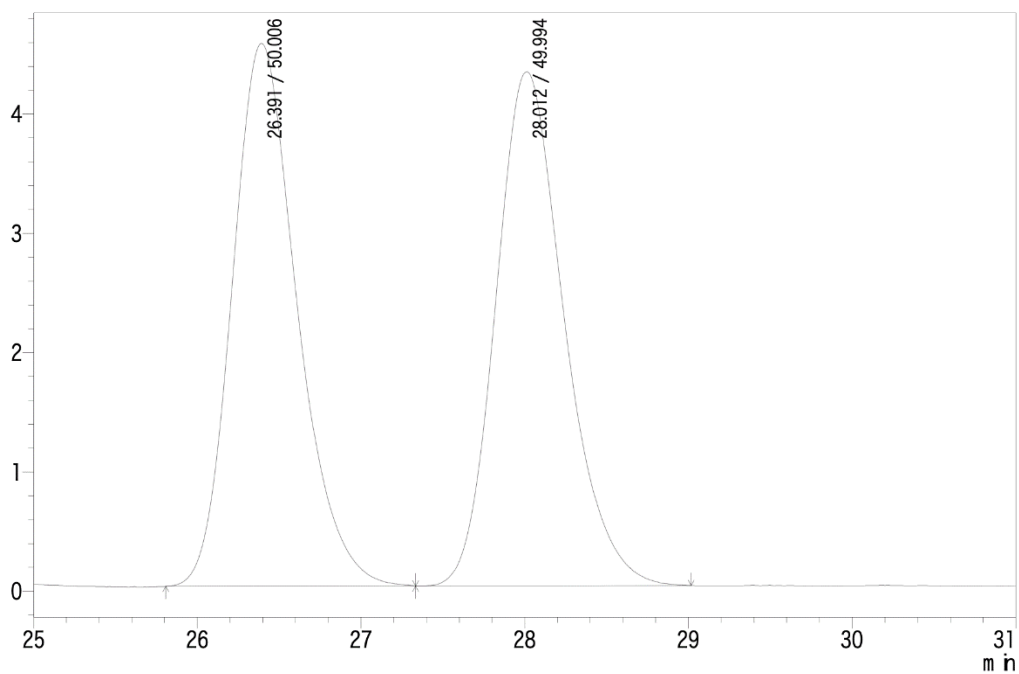

| peak# | retention time | area%   |
|-------|----------------|---------|
| 1     | 26.391         | 50.006  |
| 2     | 28.012         | 49.994  |
| Total |                | 100.000 |

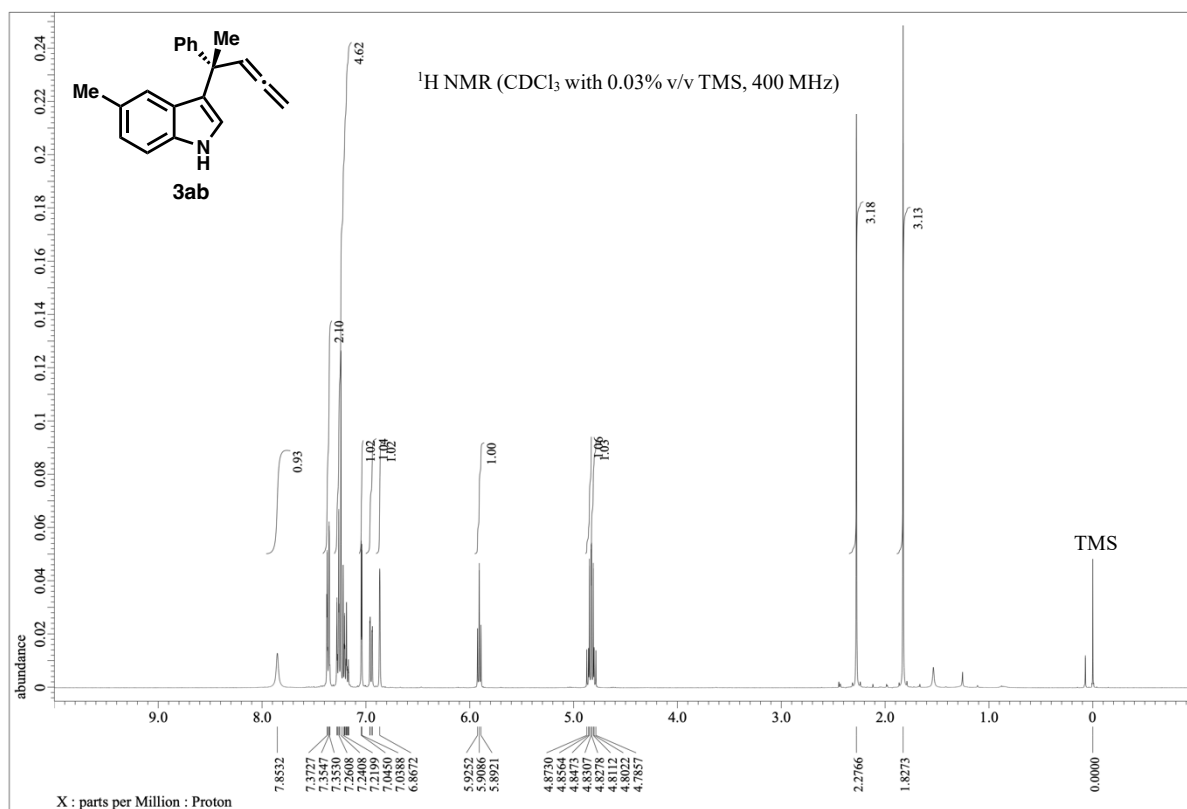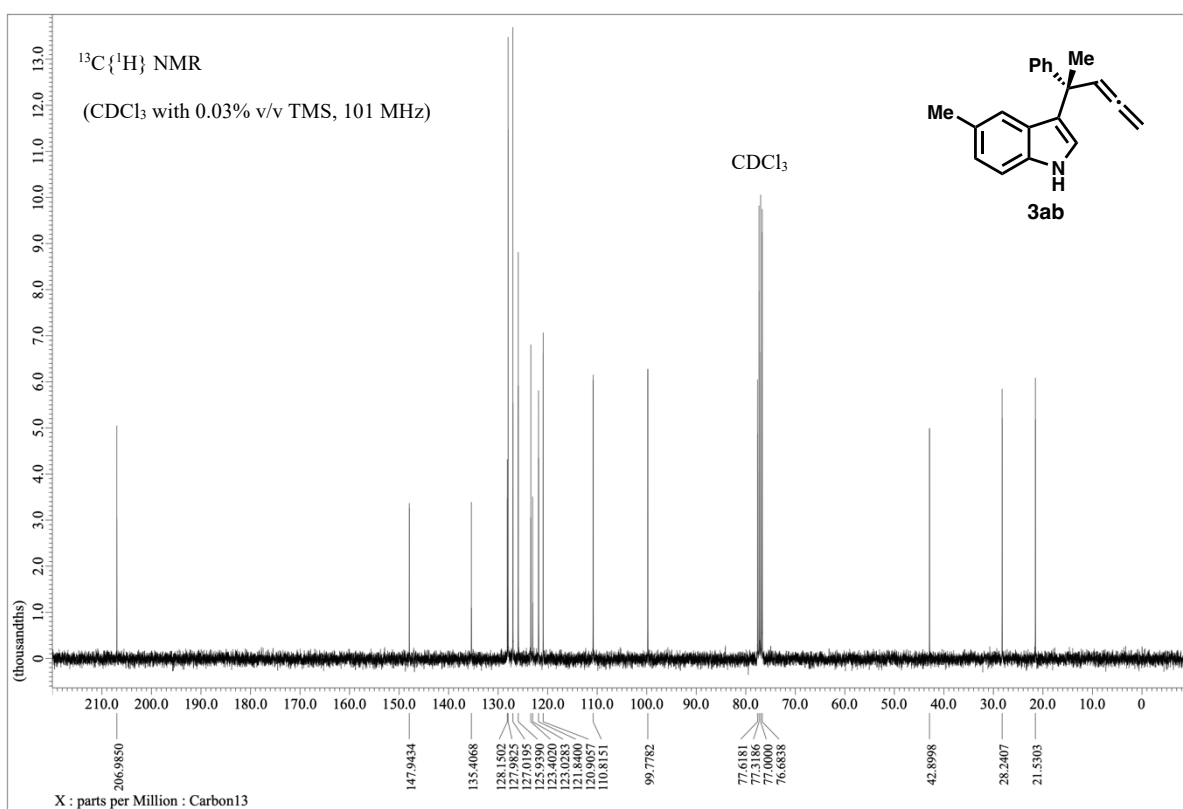

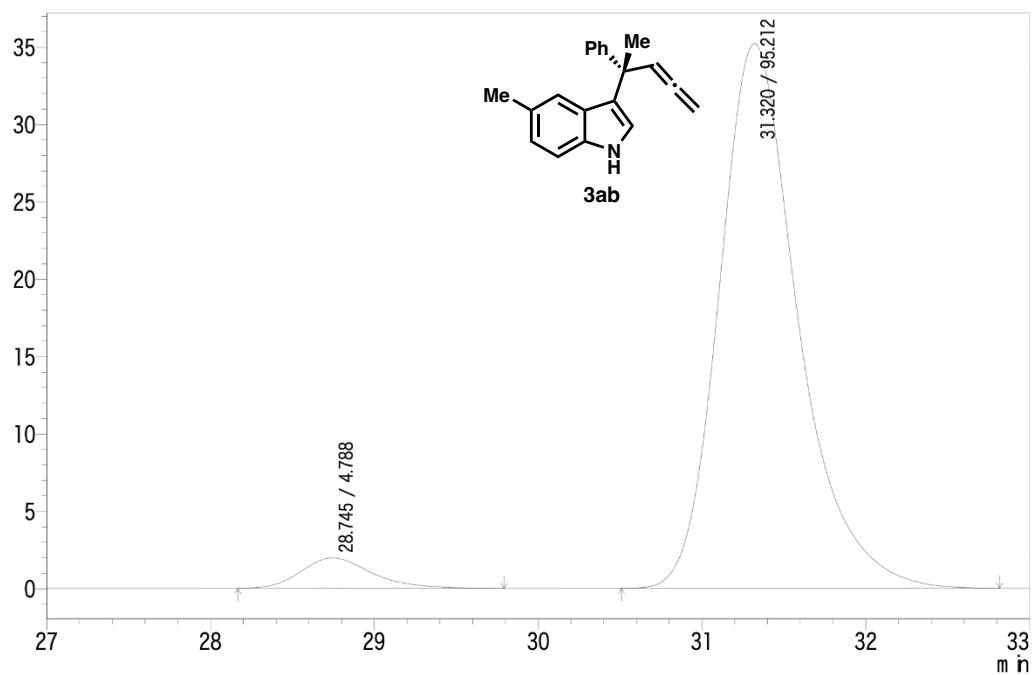

| peak# | retention time | area%   |
|-------|----------------|---------|
| 1     | 28.745         | 4.788   |
| 2     | 31.320         | 95.212  |
| Total |                | 100.000 |

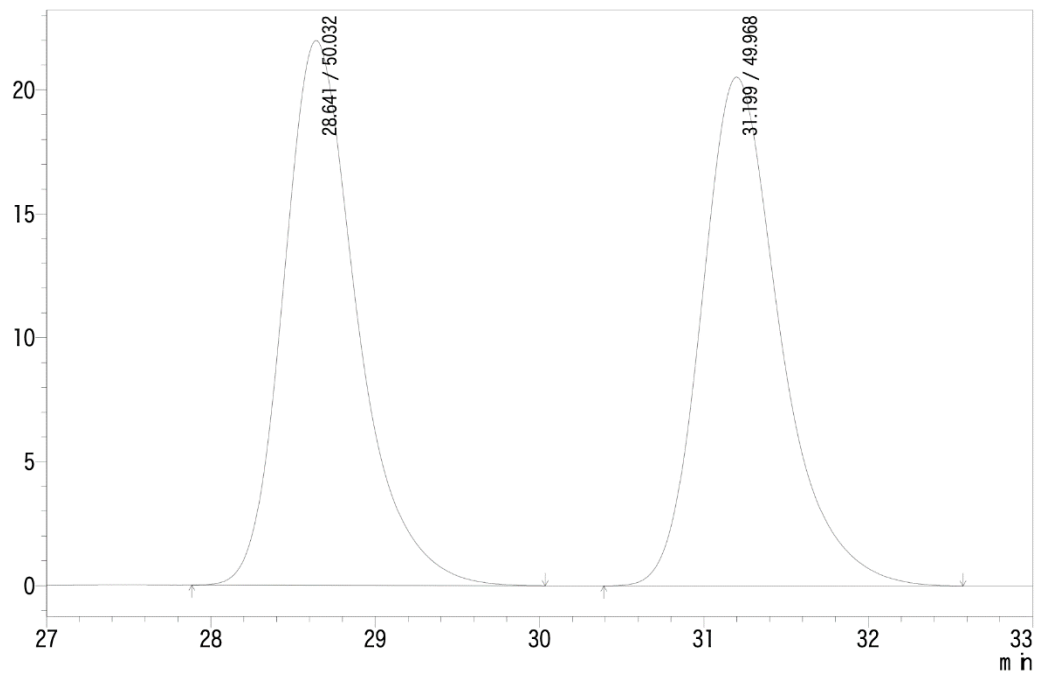

| peak# | retention time | area%   |
|-------|----------------|---------|
| 1     | 28.641         | 50.032  |
| 2     | 31.199         | 49.968  |
| Total |                | 100.000 |



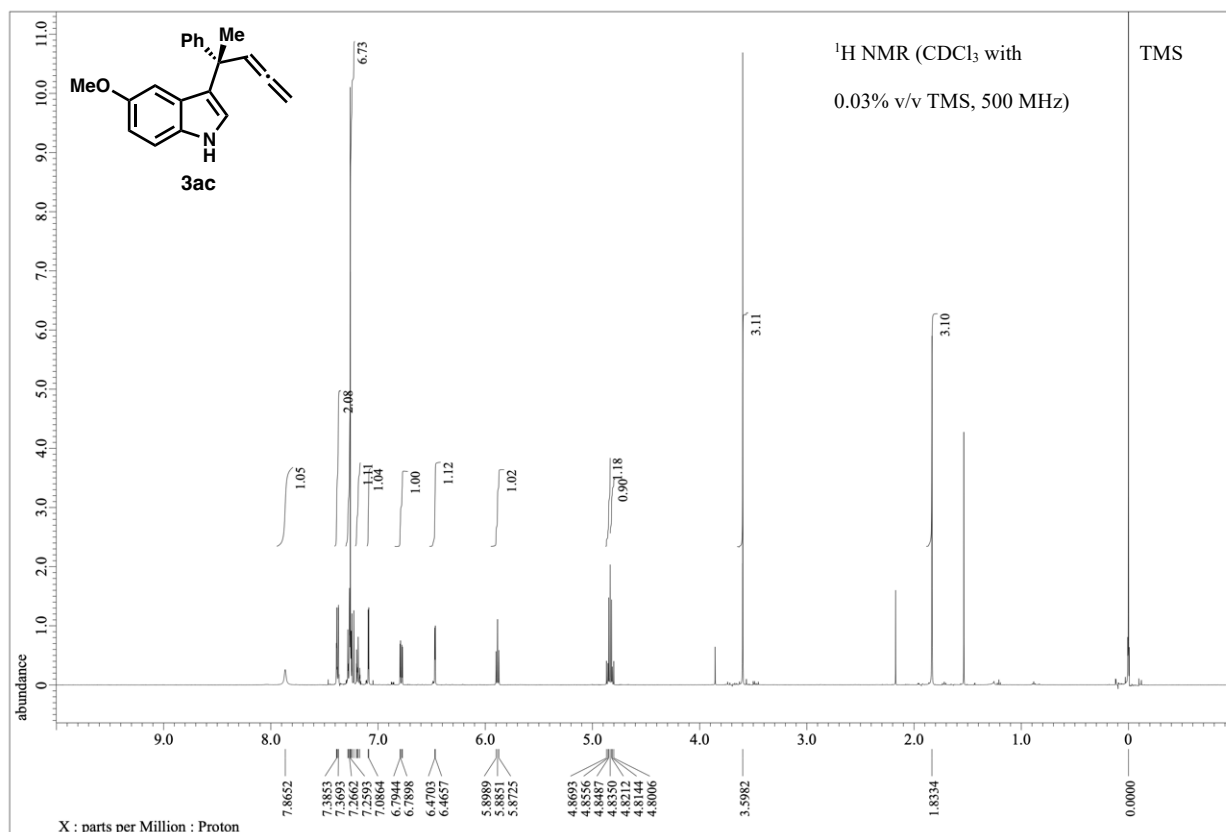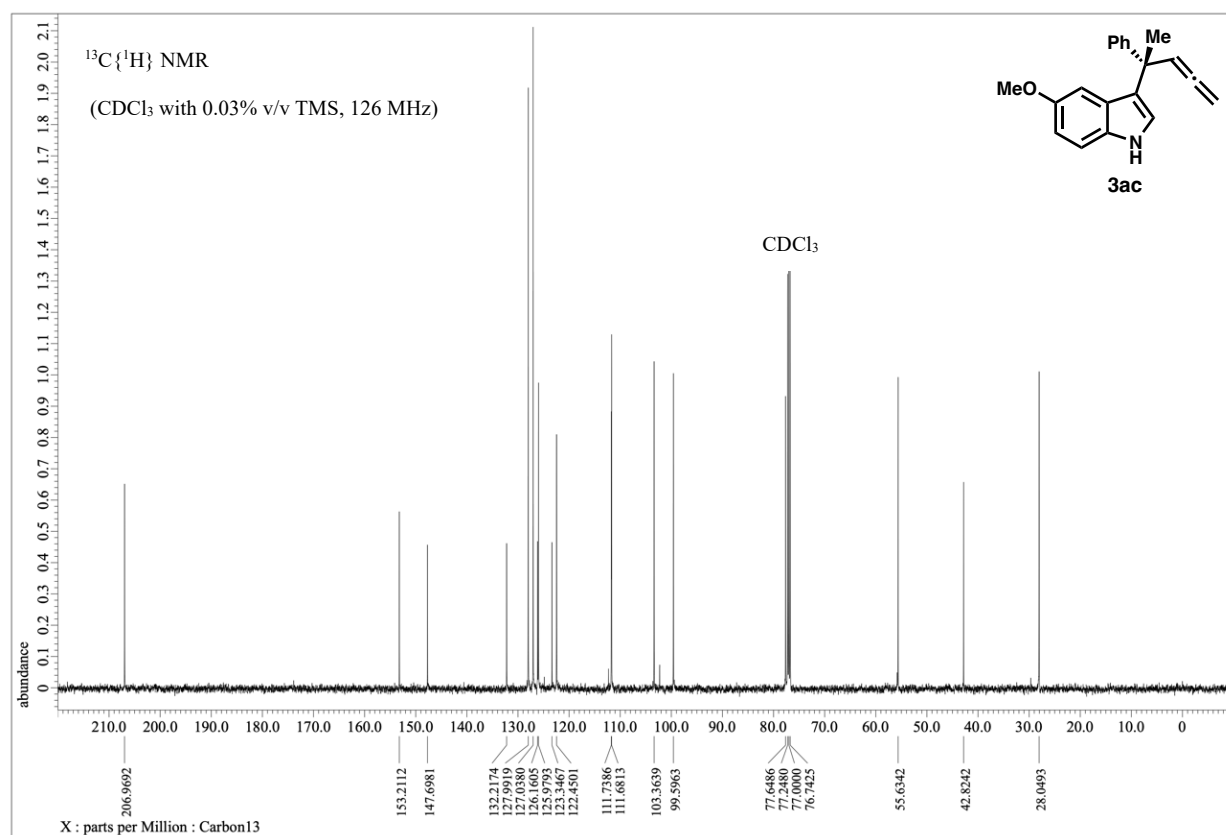

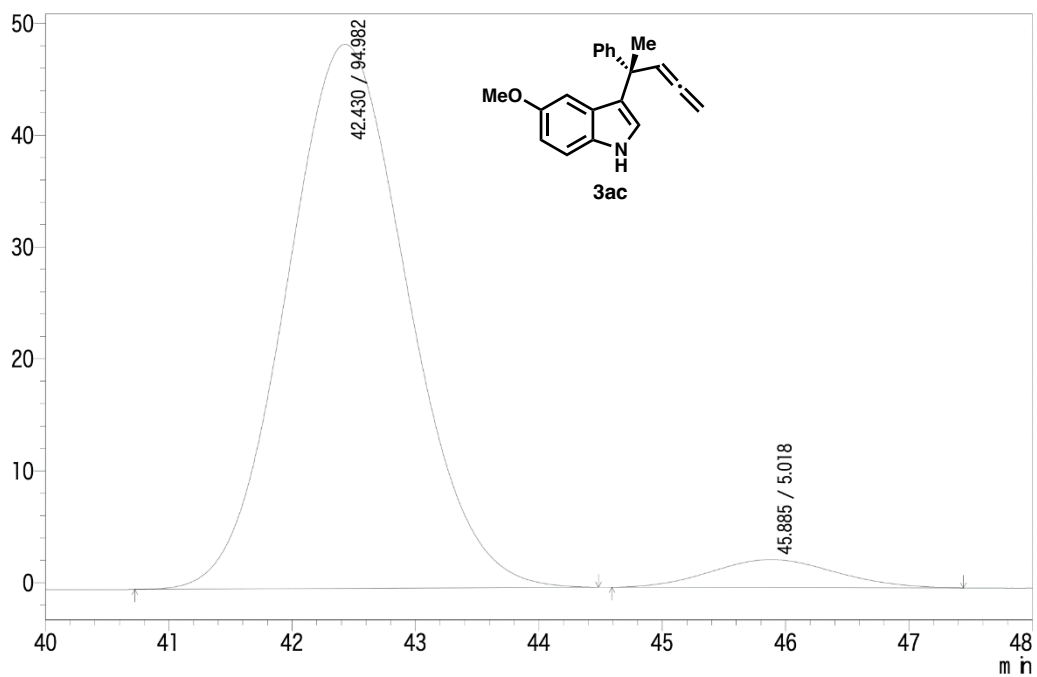

| peak# | retention time | area%   |
|-------|----------------|---------|
| 1     | 42.430         | 94.982  |
| 2     | 45.885         | 5.018   |
| Total |                | 100.000 |

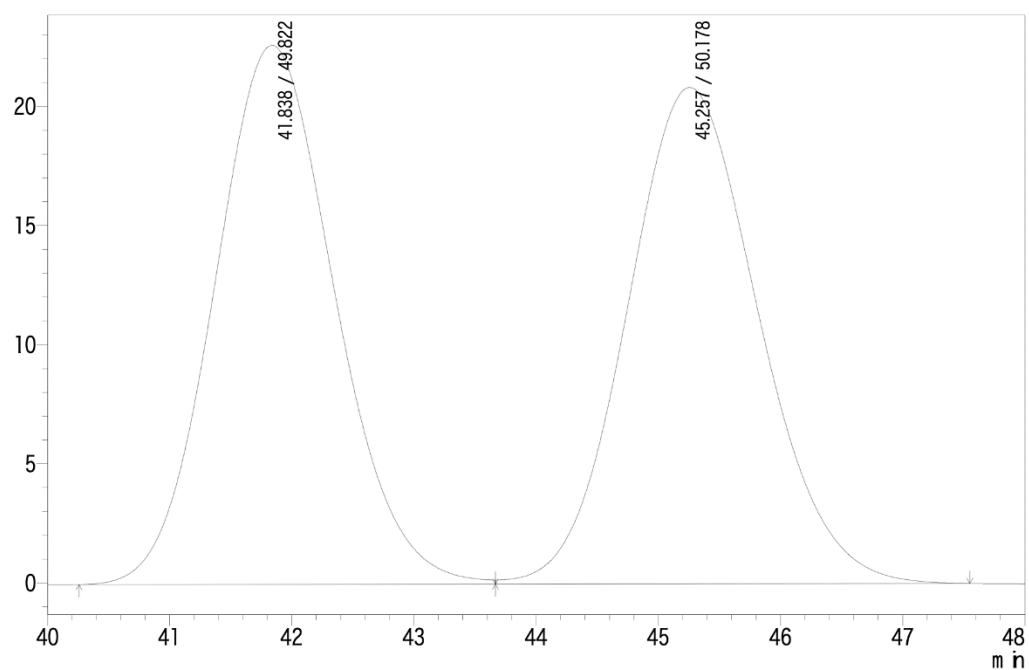

| peak# | retention time | area%   |
|-------|----------------|---------|
| 1     | 41.838         | 49.822  |
| 2     | 45.257         | 50.178  |
| Total |                | 100.000 |

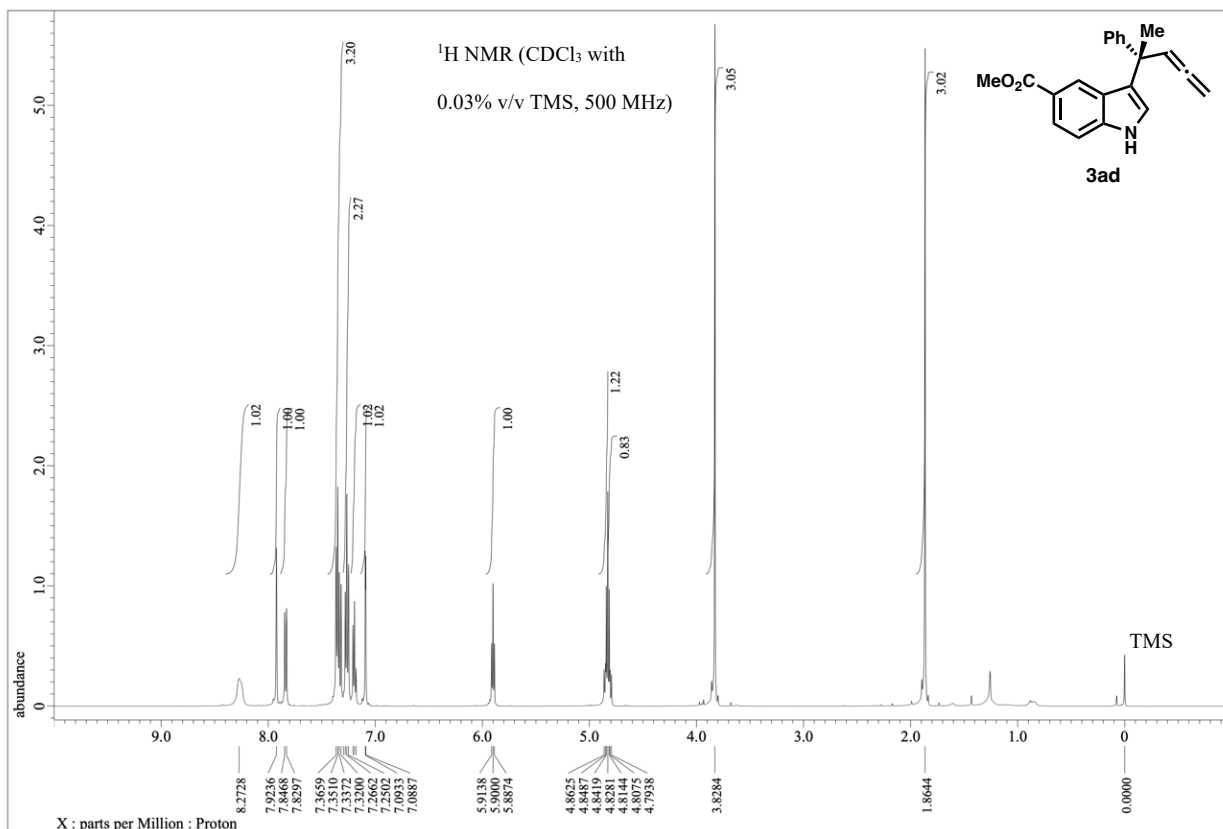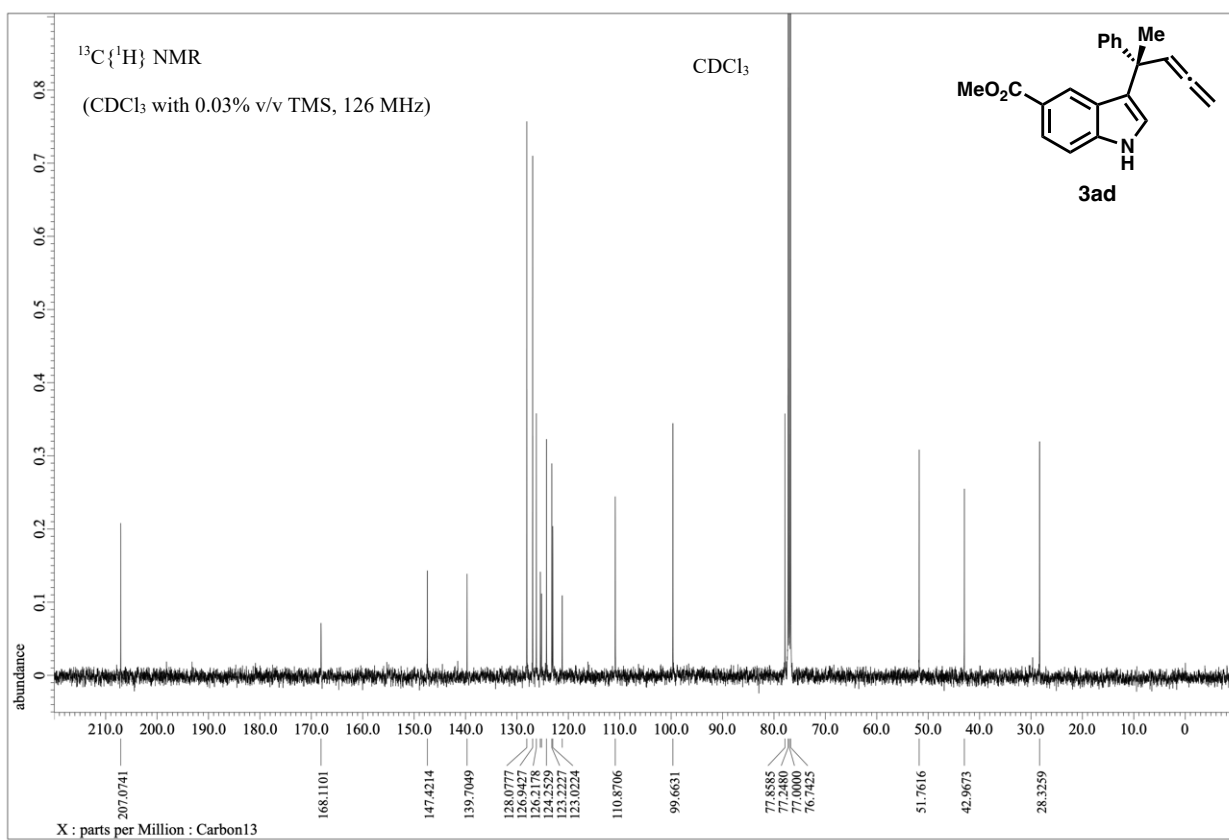

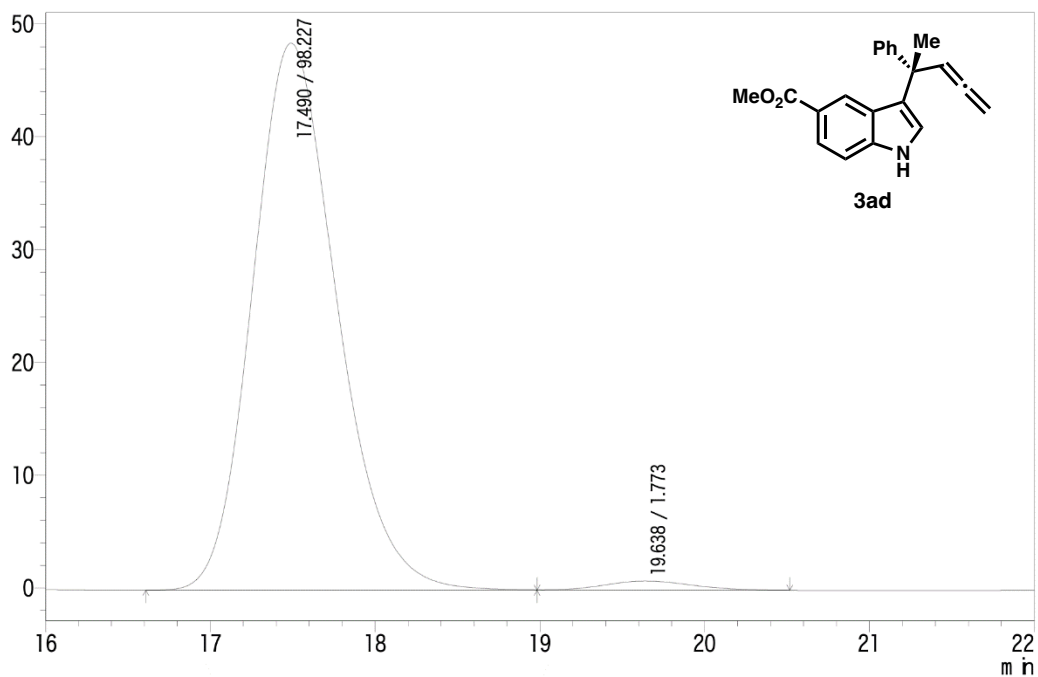

| peak# | retention time | area%   |
|-------|----------------|---------|
| 1     | 17.490         | 98.227  |
| 2     | 19.638         | 1.773   |
| Total |                | 100.000 |

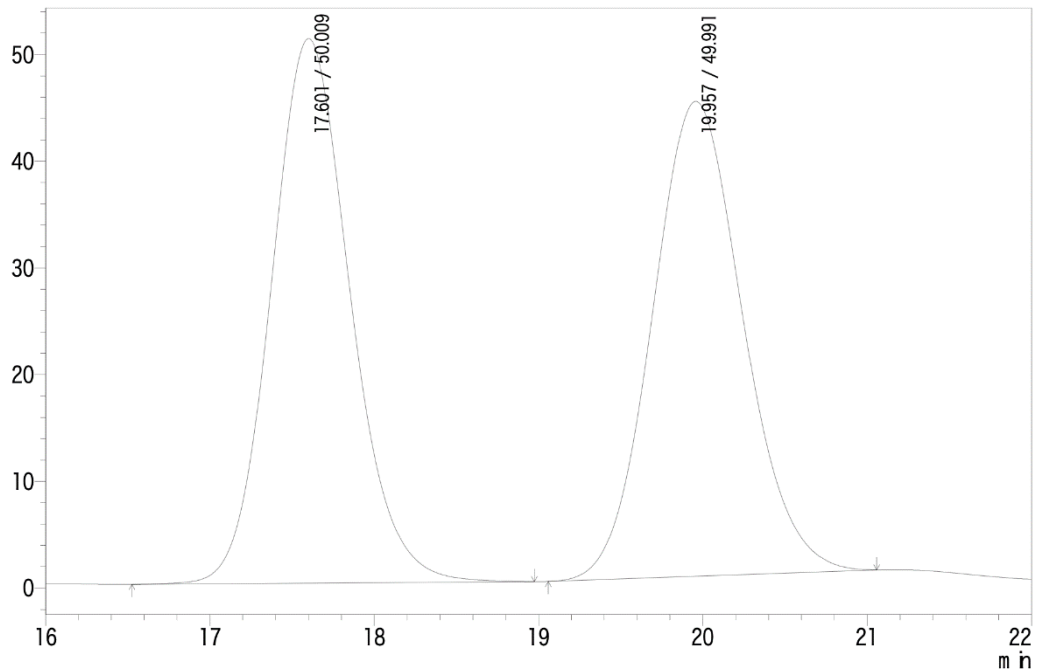

| peak# | retention time | area%   |
|-------|----------------|---------|
| 1     | 17.601         | 50.009  |
| 2     | 19.957         | 49.991  |
| Total |                | 100.000 |

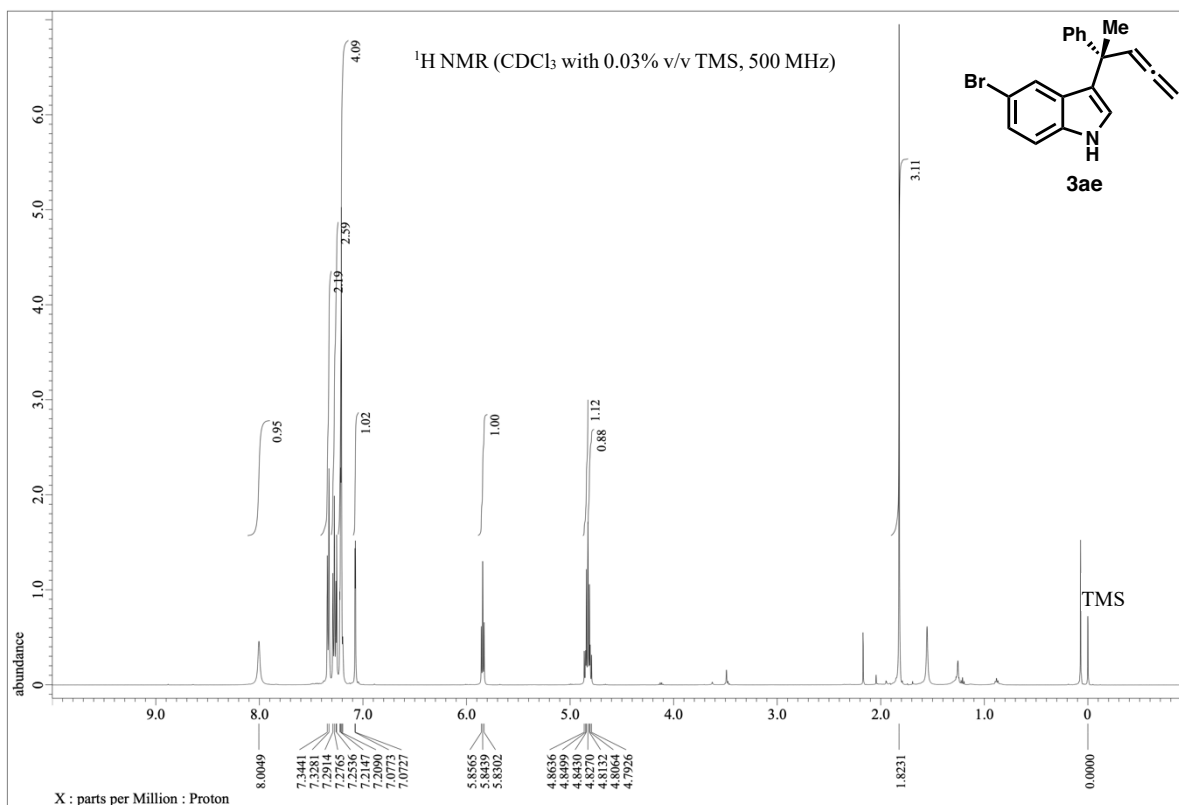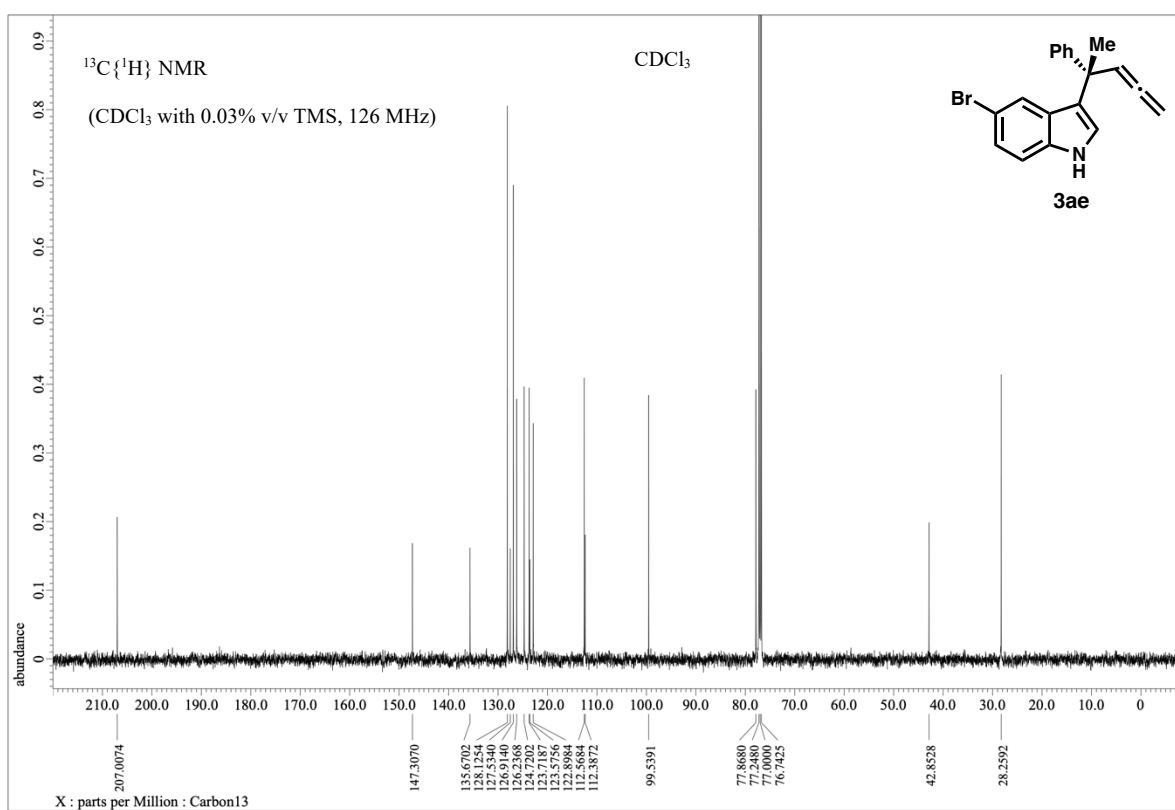

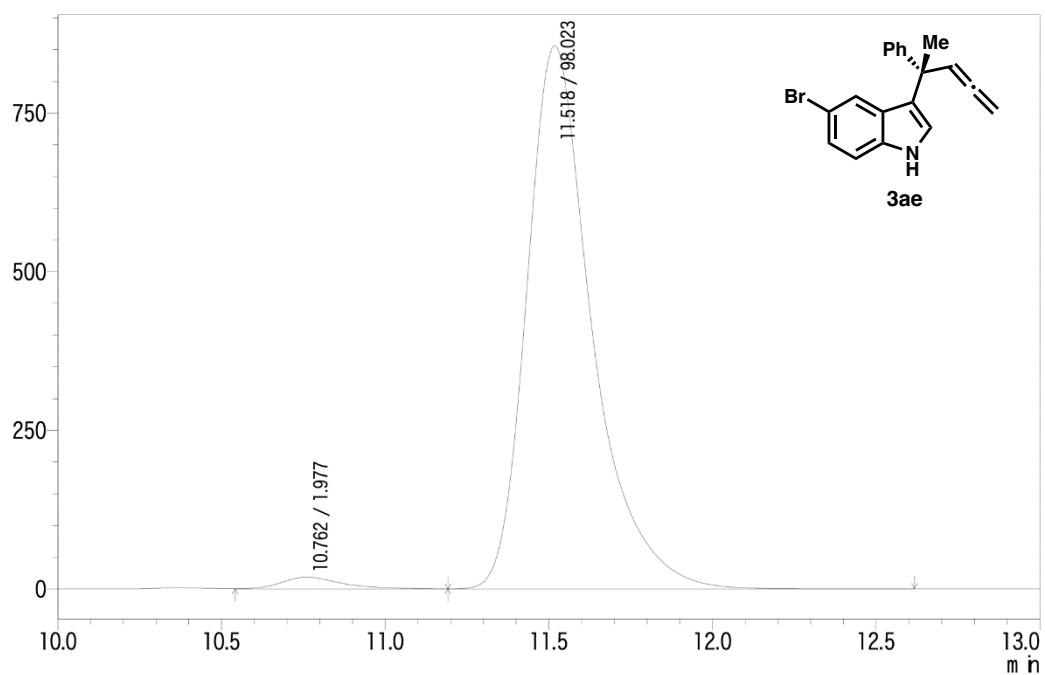

| peak# | retention time | area%   |
|-------|----------------|---------|
| 1     | 10.762         | 1.977   |
| 2     | 11.518         | 98.023  |
| Total |                | 100.000 |

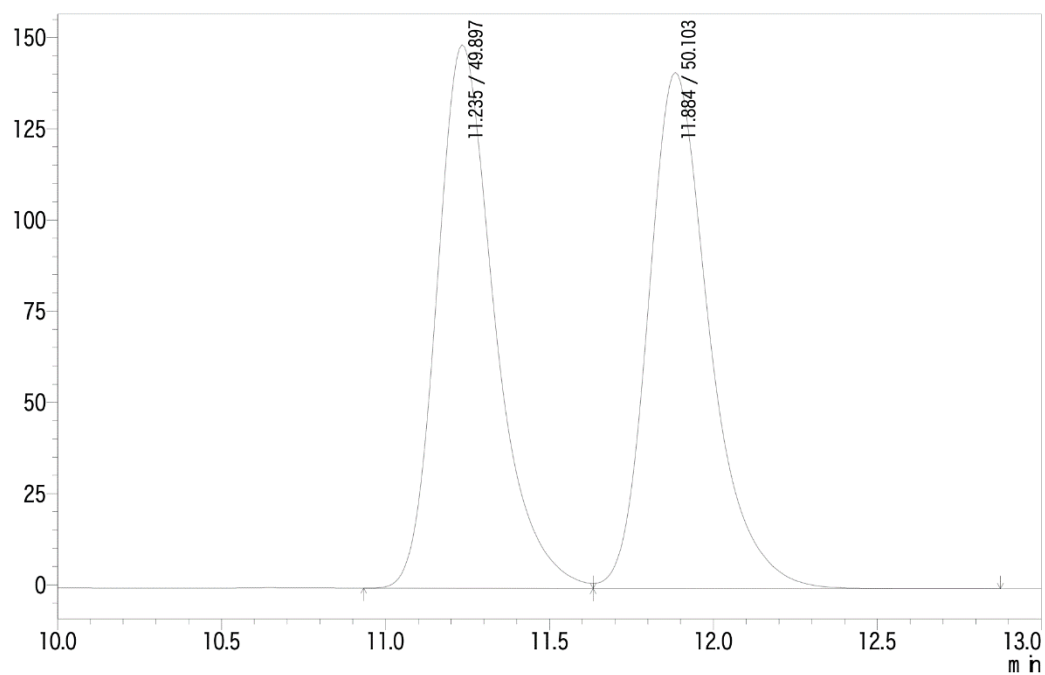

| peak# | retention time | area%   |
|-------|----------------|---------|
| 1     | 11.235         | 49.897  |
| 2     | 11.884         | 50.103  |
| Total |                | 100.000 |

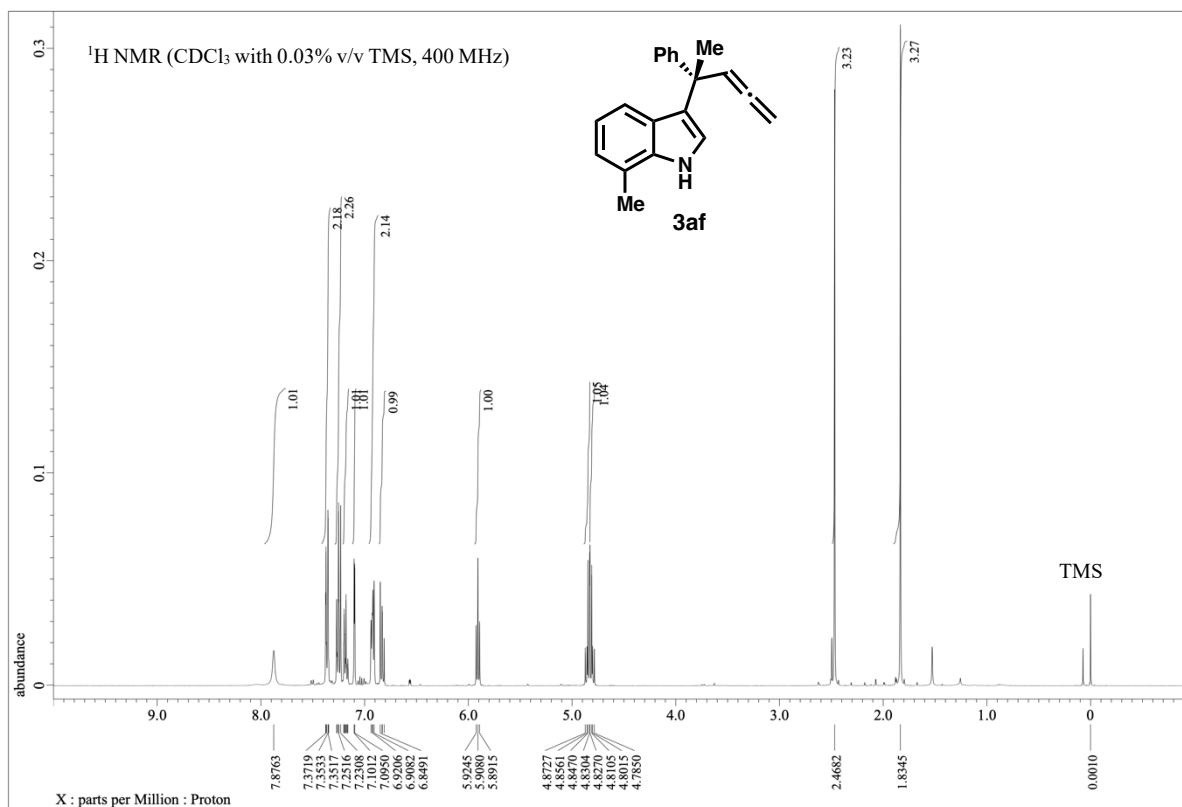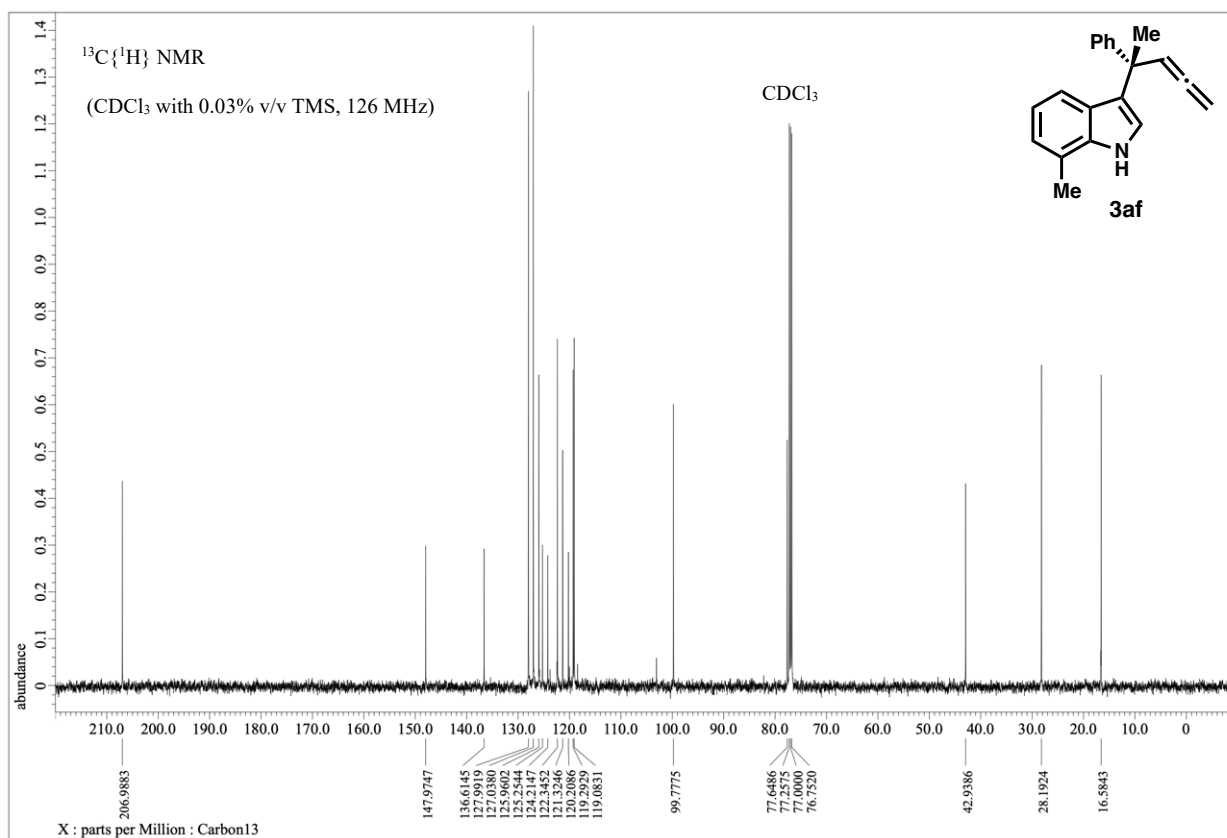

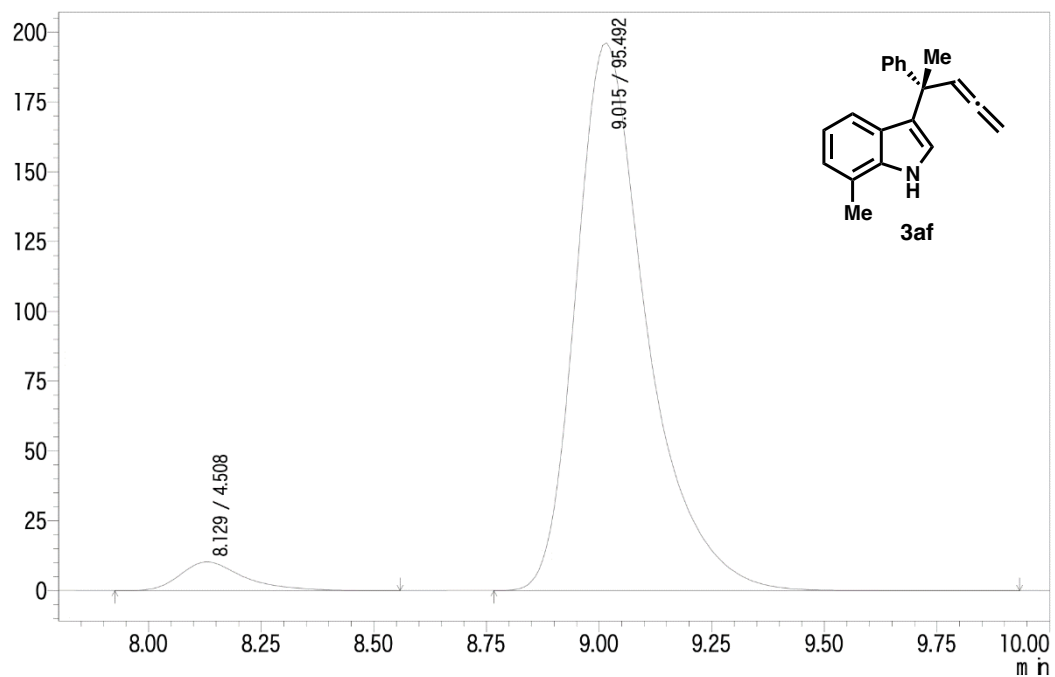

| peak# | retention time | area%   |
|-------|----------------|---------|
| 1     | 8.129          | 4.508   |
| 2     | 9.015          | 95.492  |
| Total |                | 100.000 |

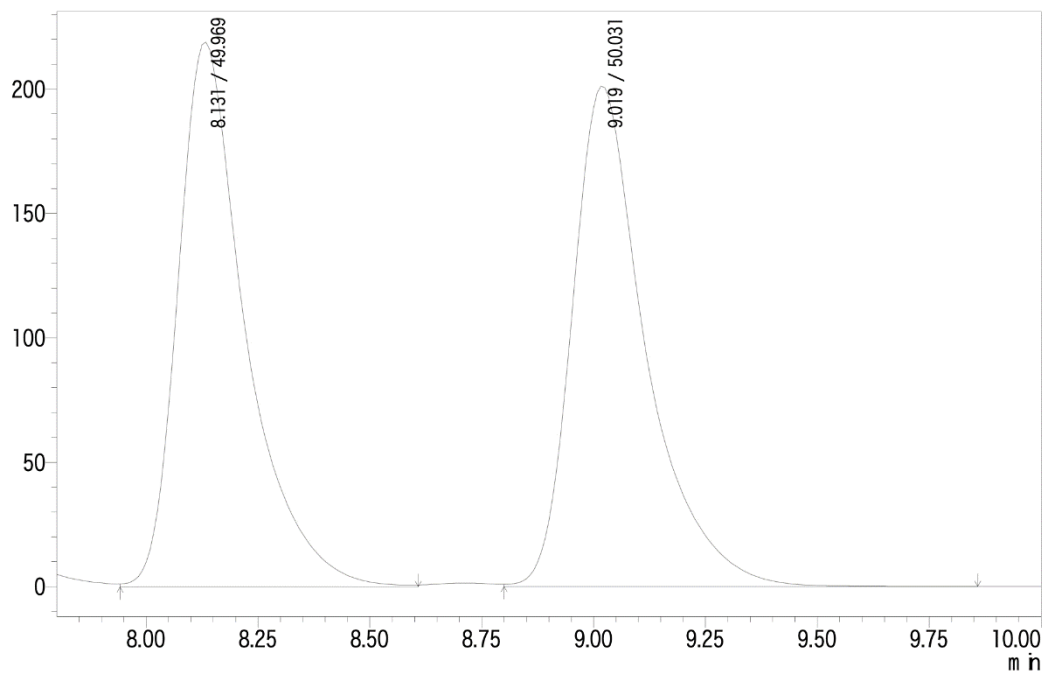

| peak# | retention time | area%   |
|-------|----------------|---------|
| 1     | 8.131          | 49.969  |
| 2     | 9.019          | 50.031  |
| Total |                | 100.000 |



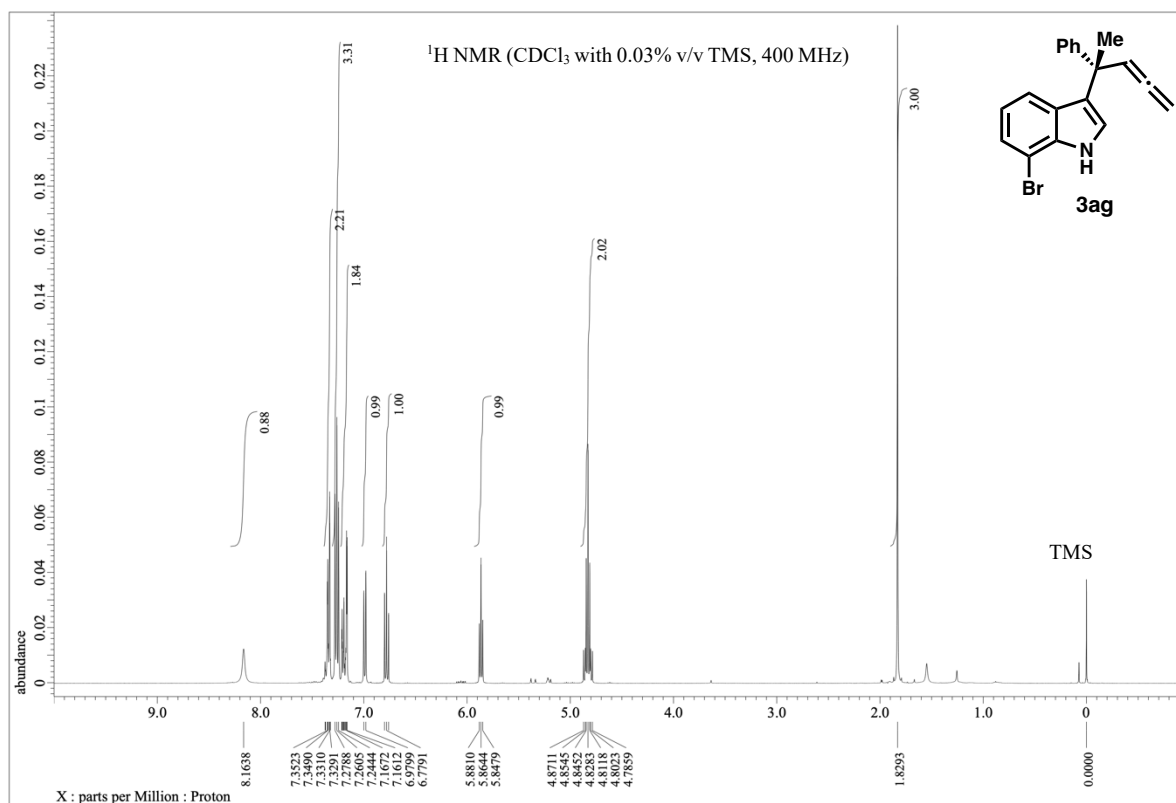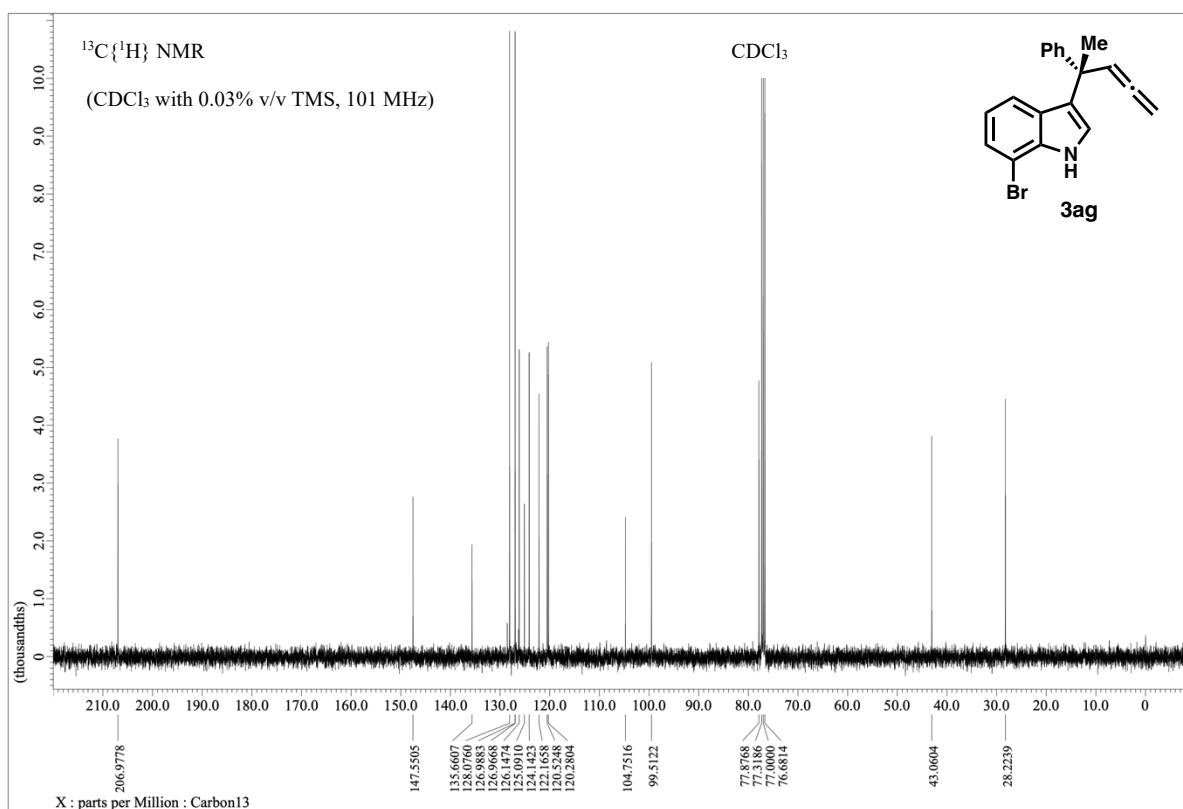

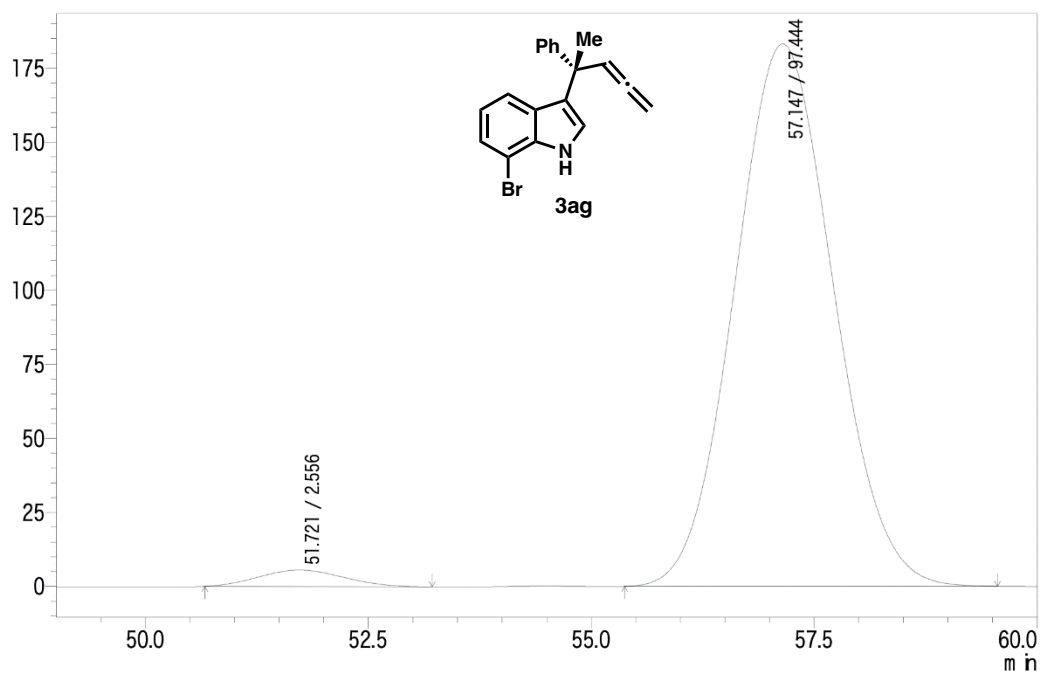

| peak# | retention time | area%   |
|-------|----------------|---------|
| 1     | 51.721         | 2.556   |
| 2     | 57.147         | 97.444  |
| Total |                | 100.000 |

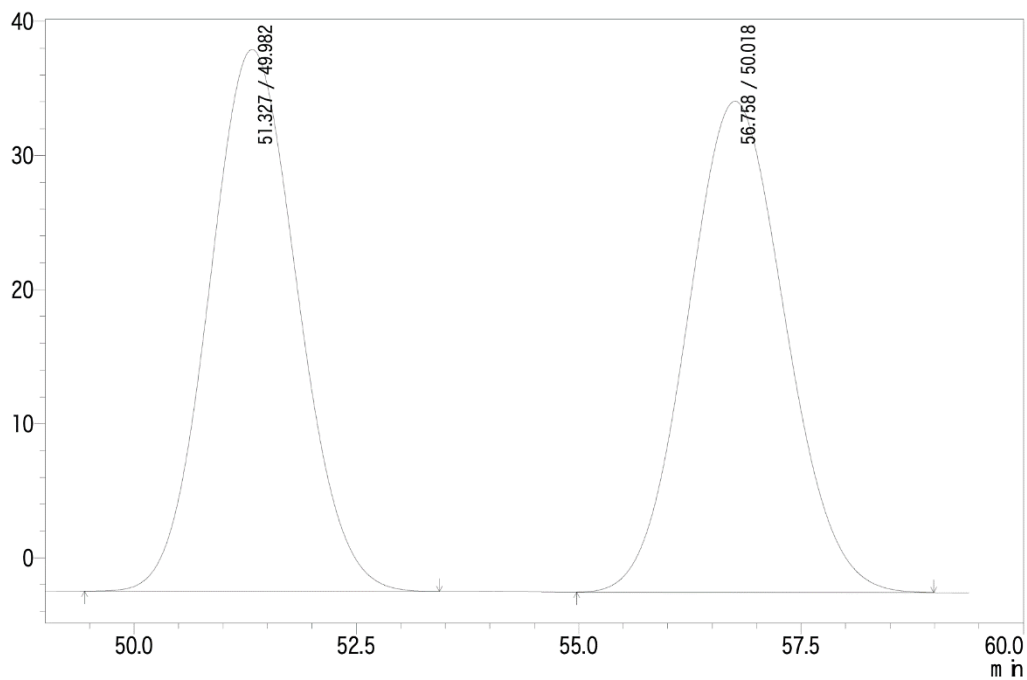

| peak# | retention time | area%   |
|-------|----------------|---------|
| 1     | 51.327         | 49.982  |
| 2     | 56.758         | 50.018  |
| Total |                | 100.000 |

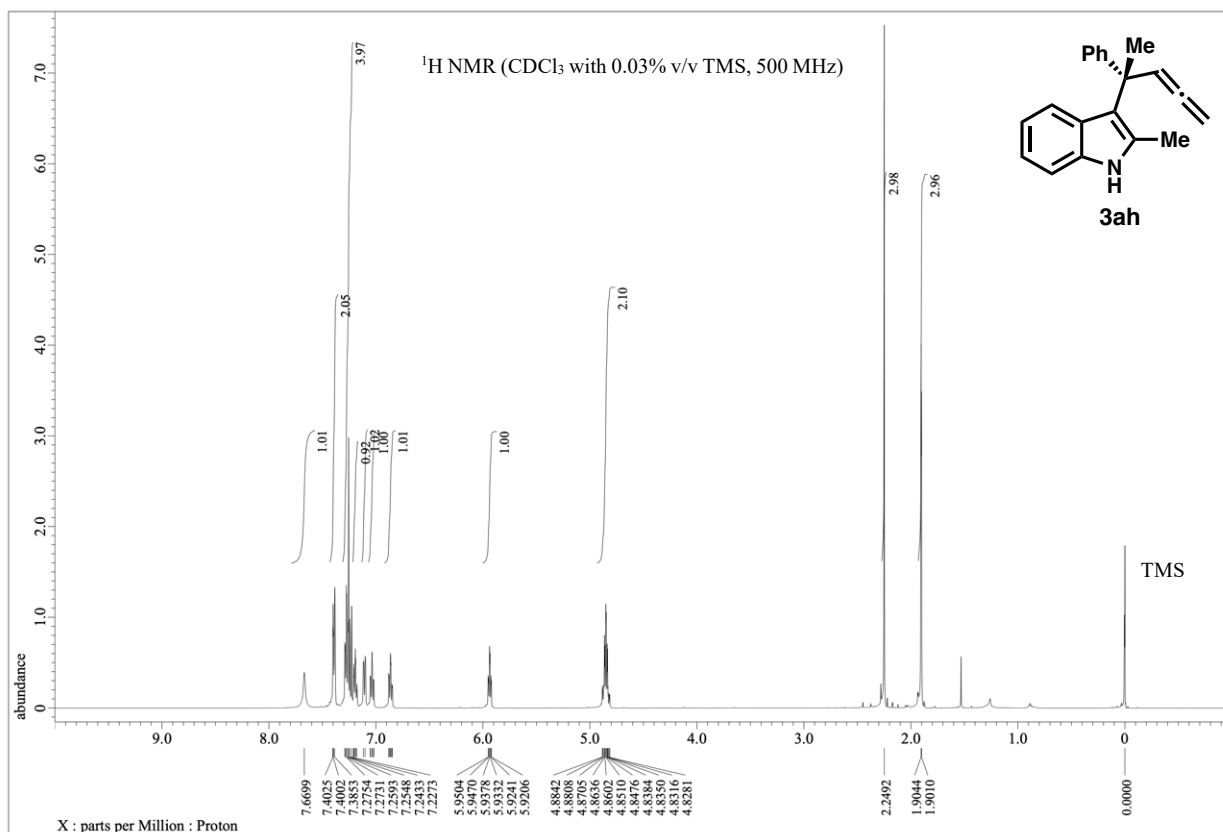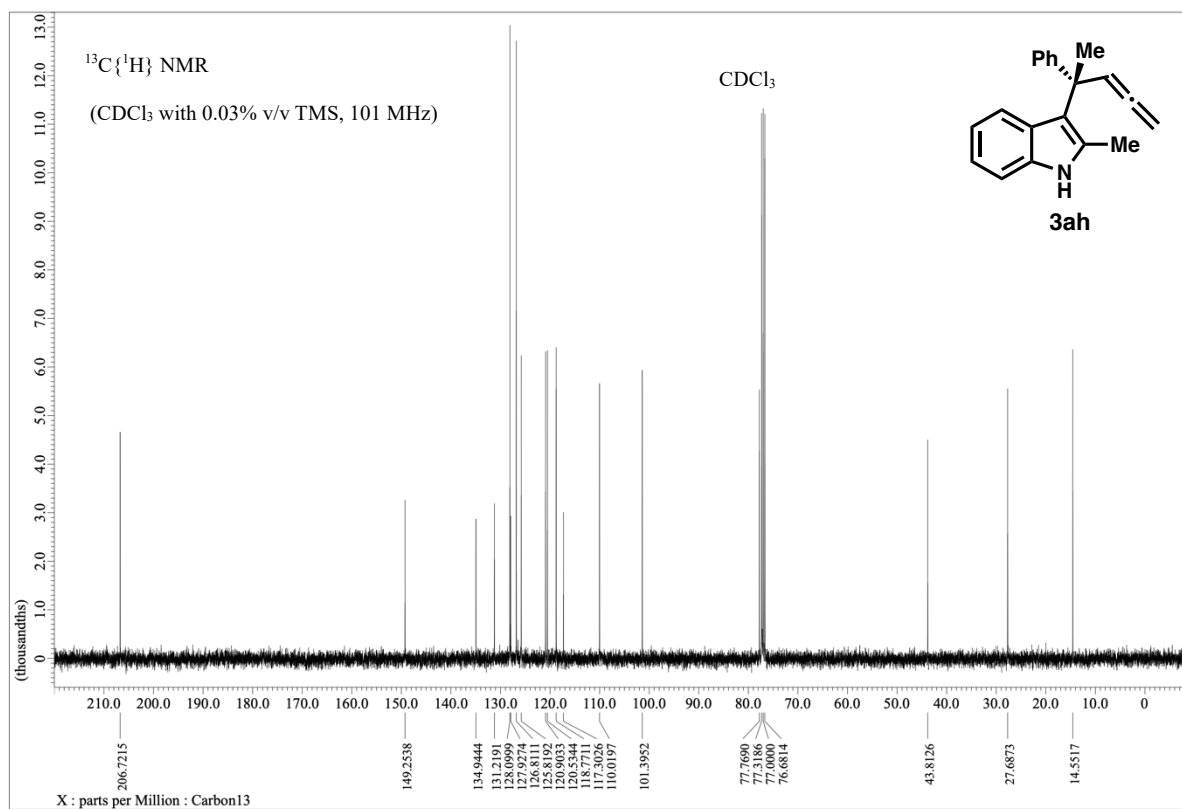

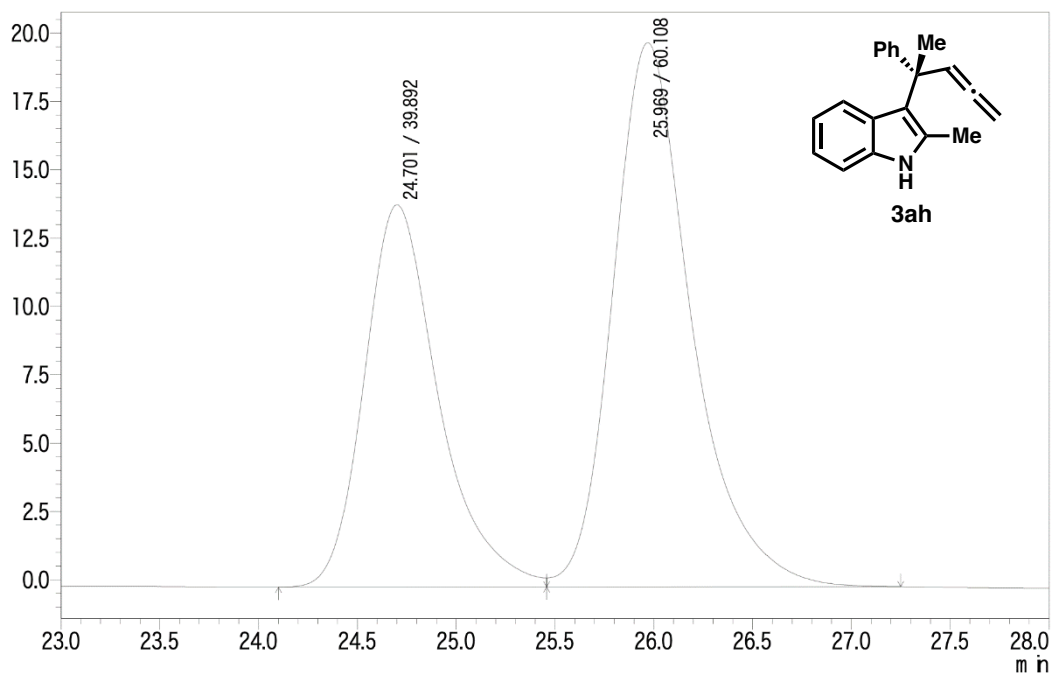

| peak# | retention time | area%   |
|-------|----------------|---------|
| 1     | 24.701         | 39.892  |
| 2     | 25.969         | 60.108  |
| Total |                | 100.000 |

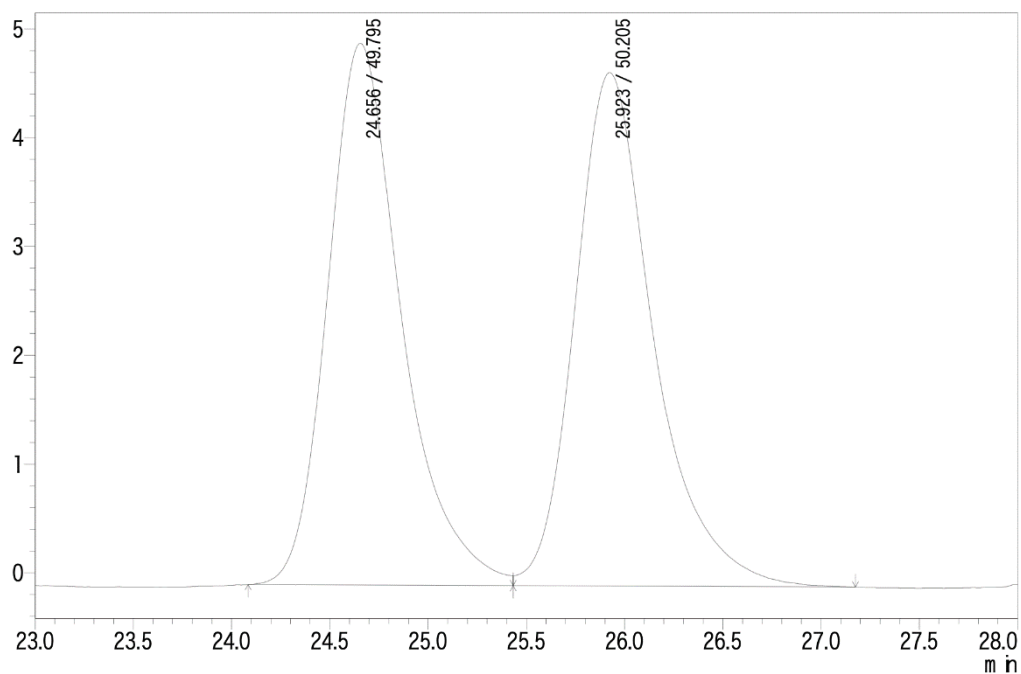

| peak# | retention time | area%   |
|-------|----------------|---------|
| 1     | 24.656         | 49.795  |
| 2     | 25.923         | 50.205  |
| Total |                | 100.000 |

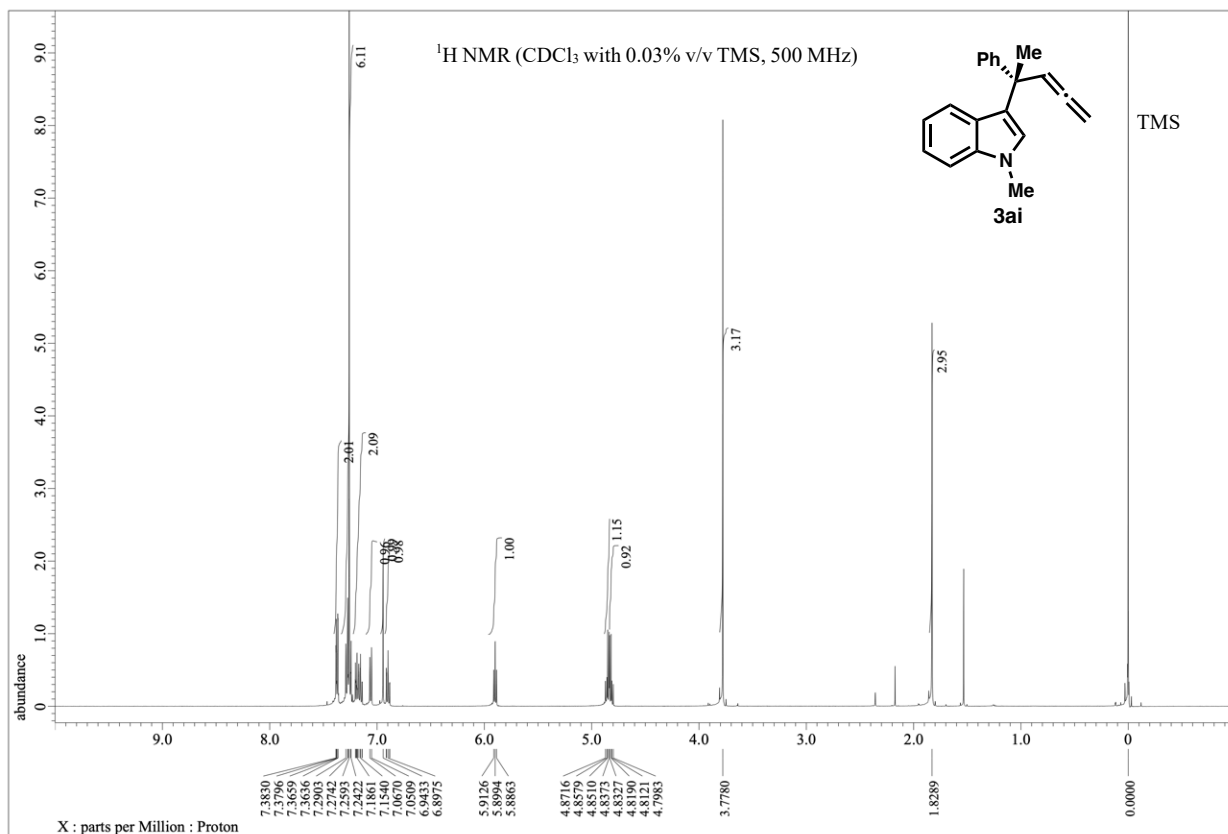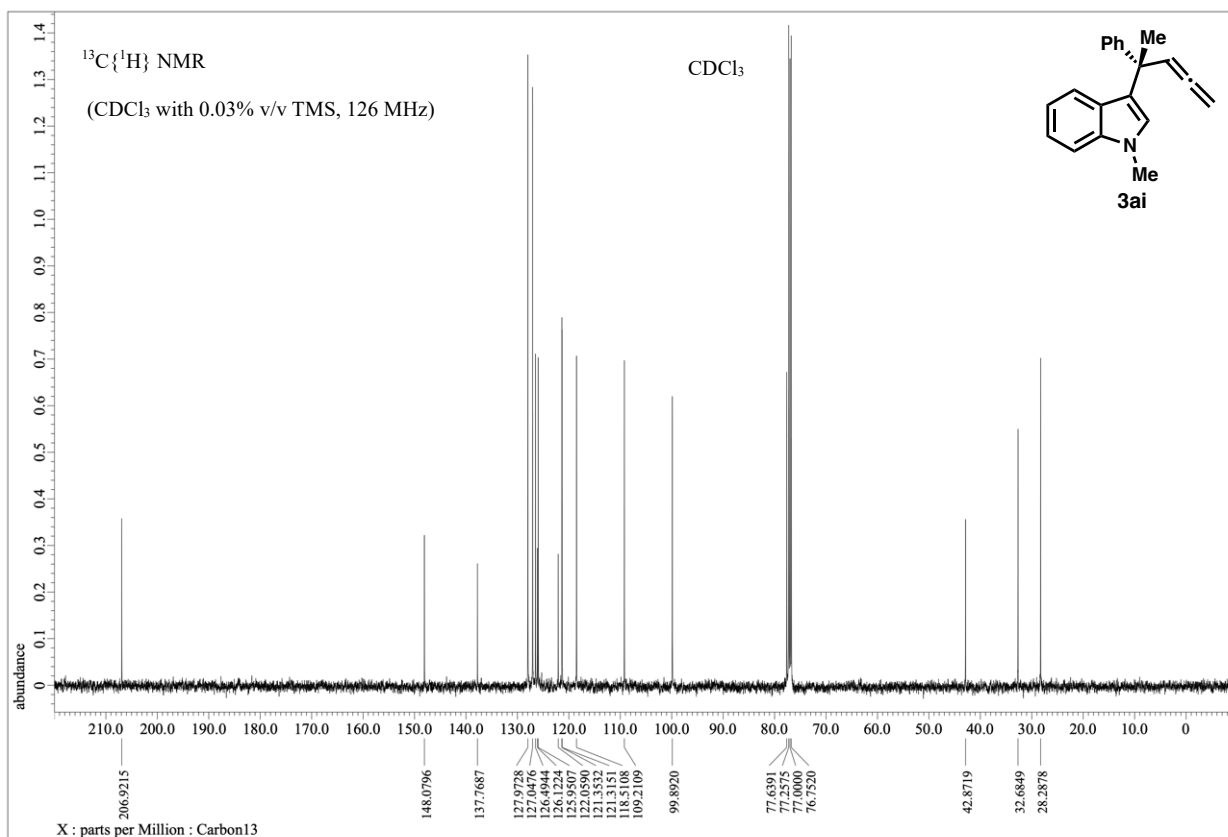

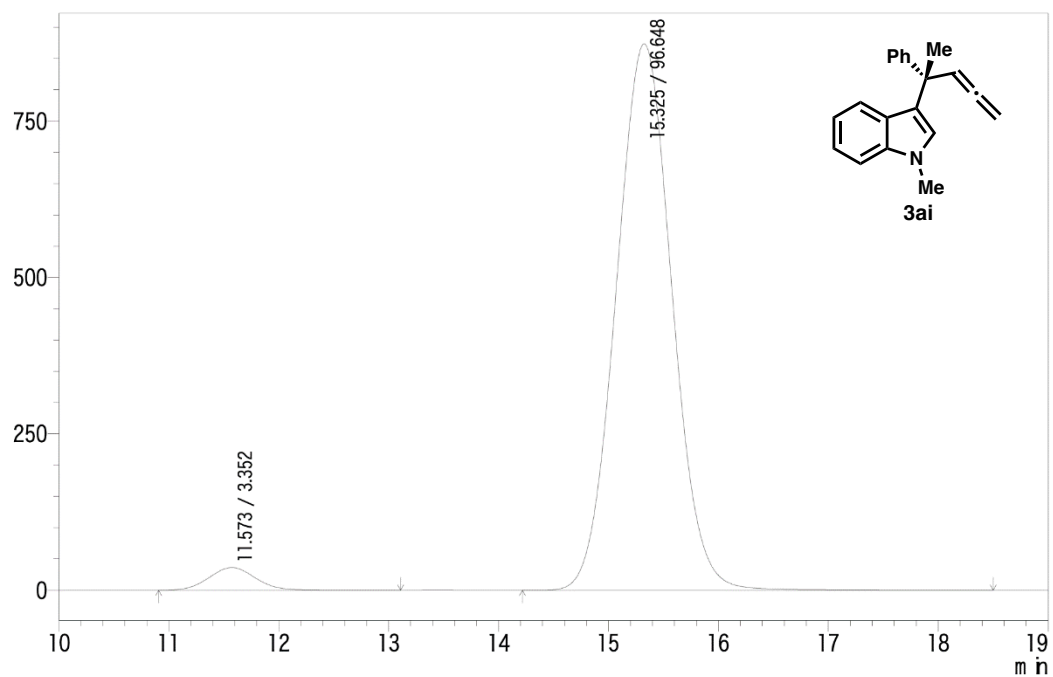

| peak# | retention time | area%   |
|-------|----------------|---------|
| 1     | 11.573         | 3.352   |
| 2     | 15.325         | 96.648  |
| Total |                | 100.000 |

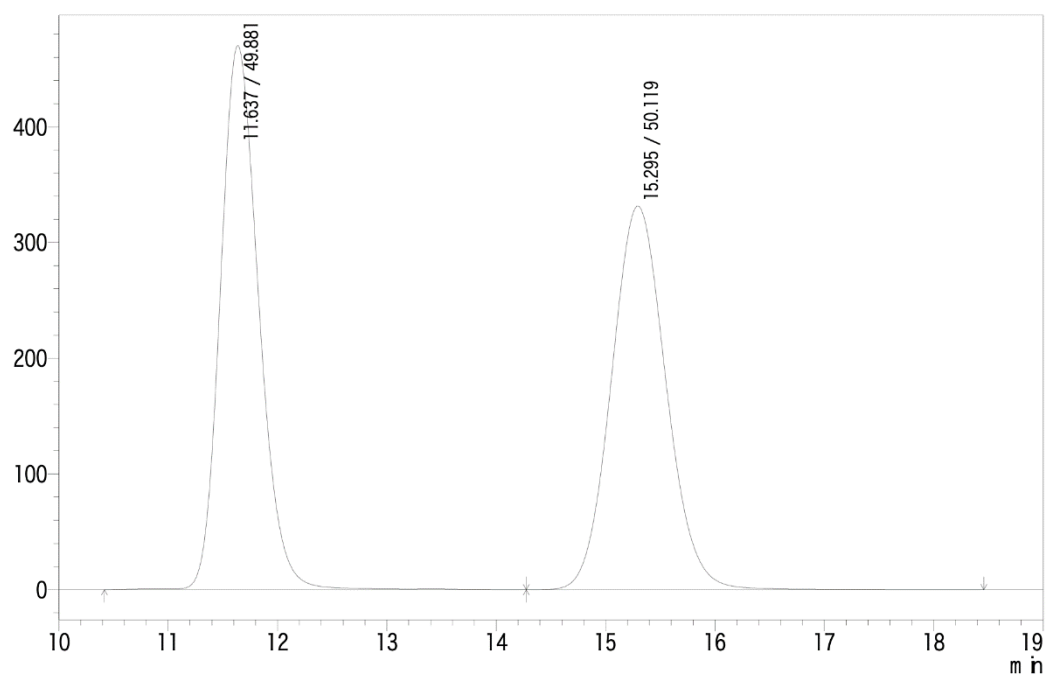

| peak# | retention time | area%   |
|-------|----------------|---------|
| 1     | 11.637         | 49.881  |
| 2     | 15.295         | 50.119  |
| Total |                | 100.000 |

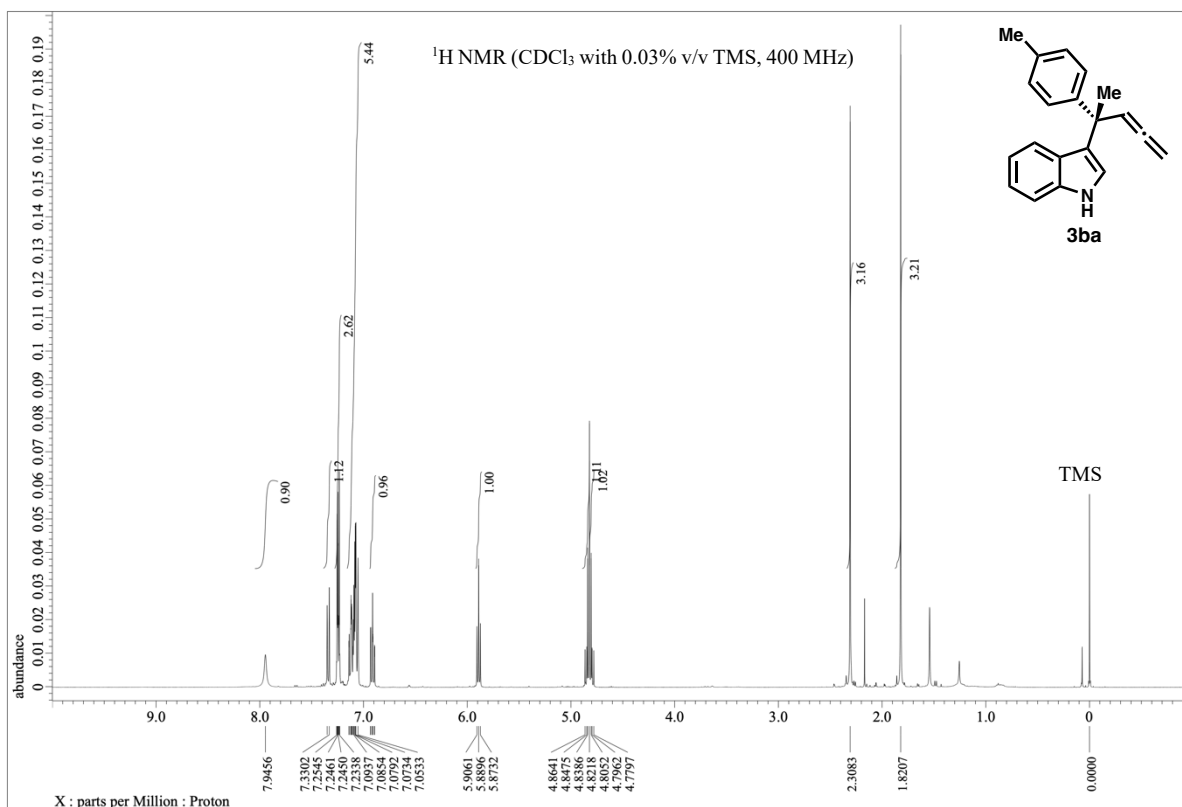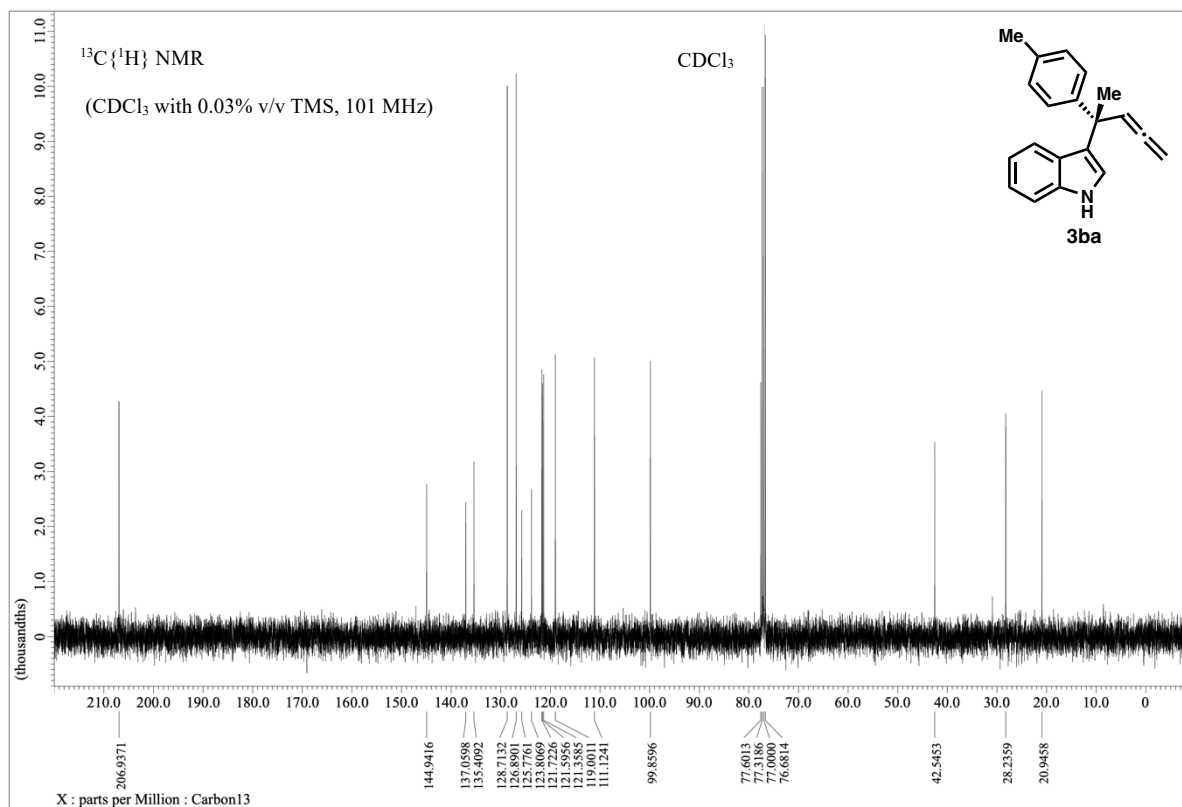

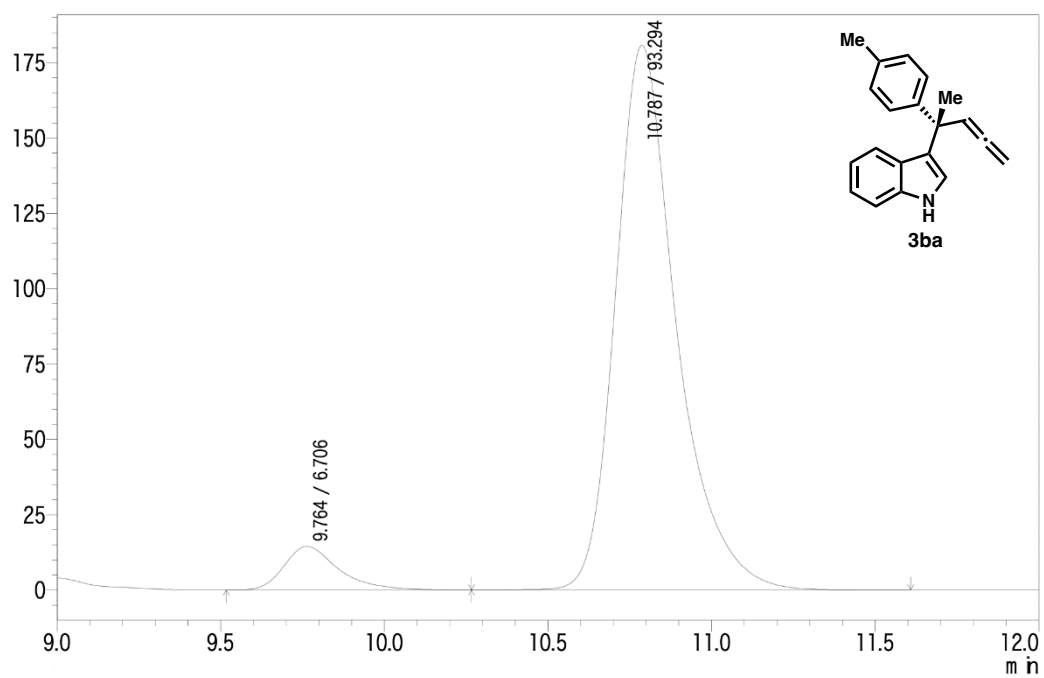

| peak# | retention time | area%   |
|-------|----------------|---------|
| 1     | 9.764          | 6.706   |
| 2     | 10.787         | 93.294  |
| Total |                | 100.000 |

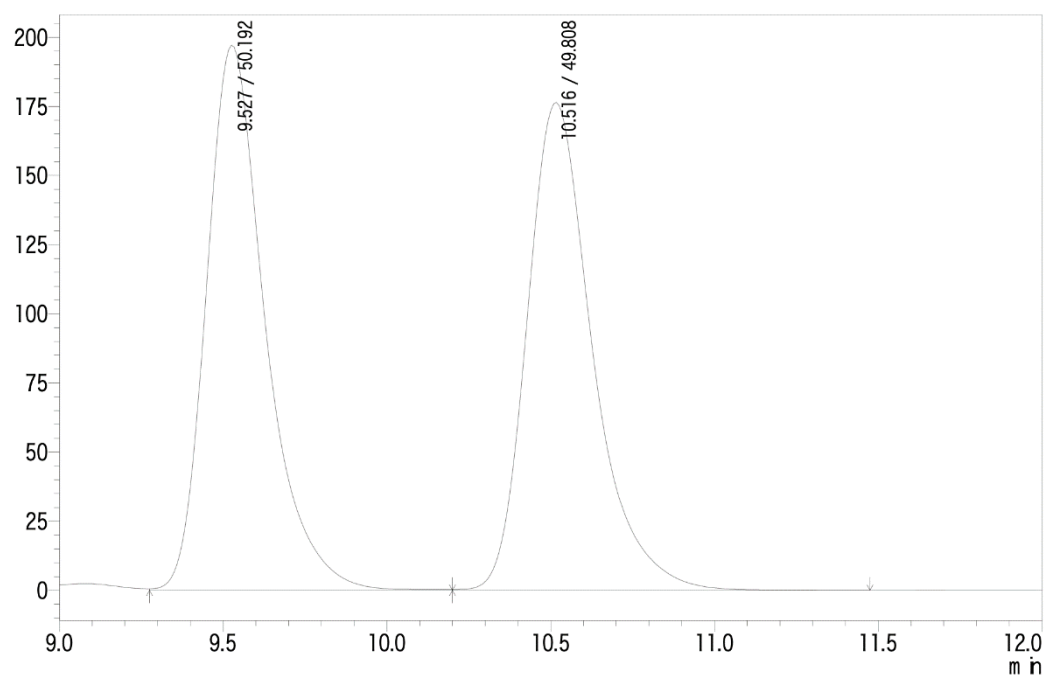

| peak# | retention time | area%   |
|-------|----------------|---------|
| 1     | 9.527          | 50.192  |
| 2     | 10.516         | 49.808  |
| Total |                | 100.000 |



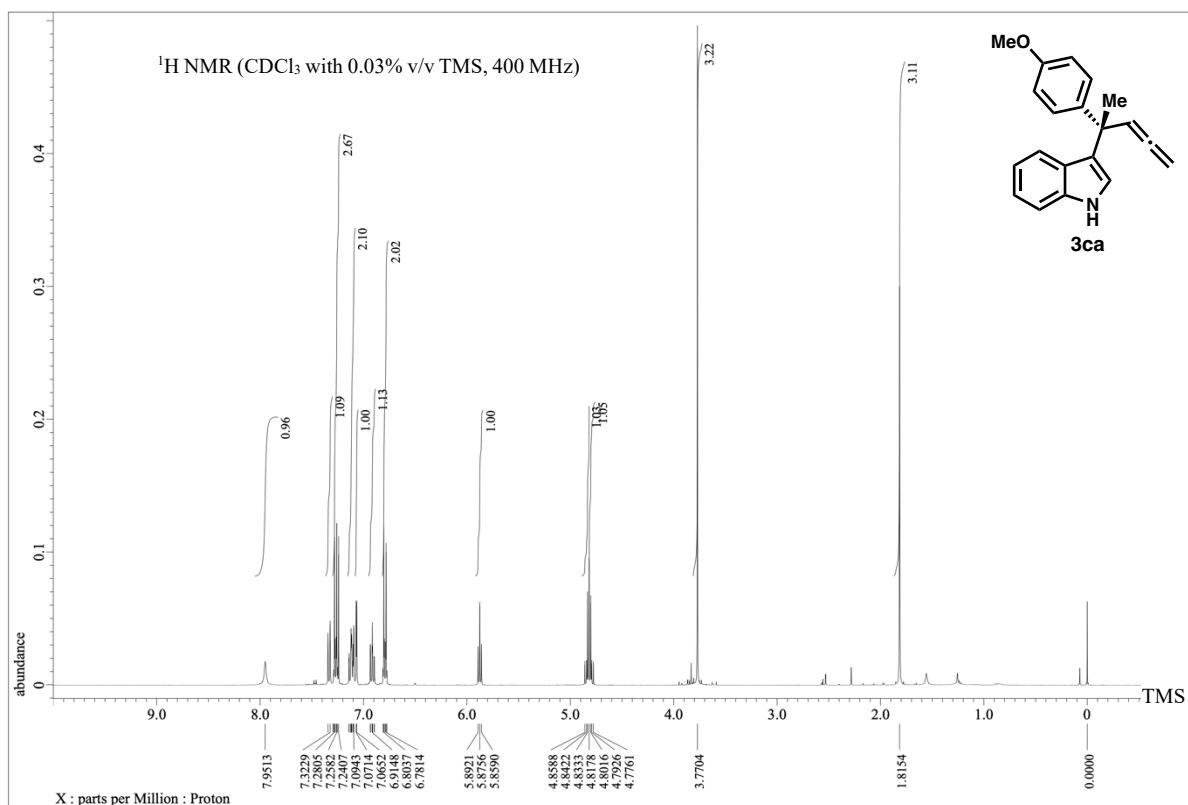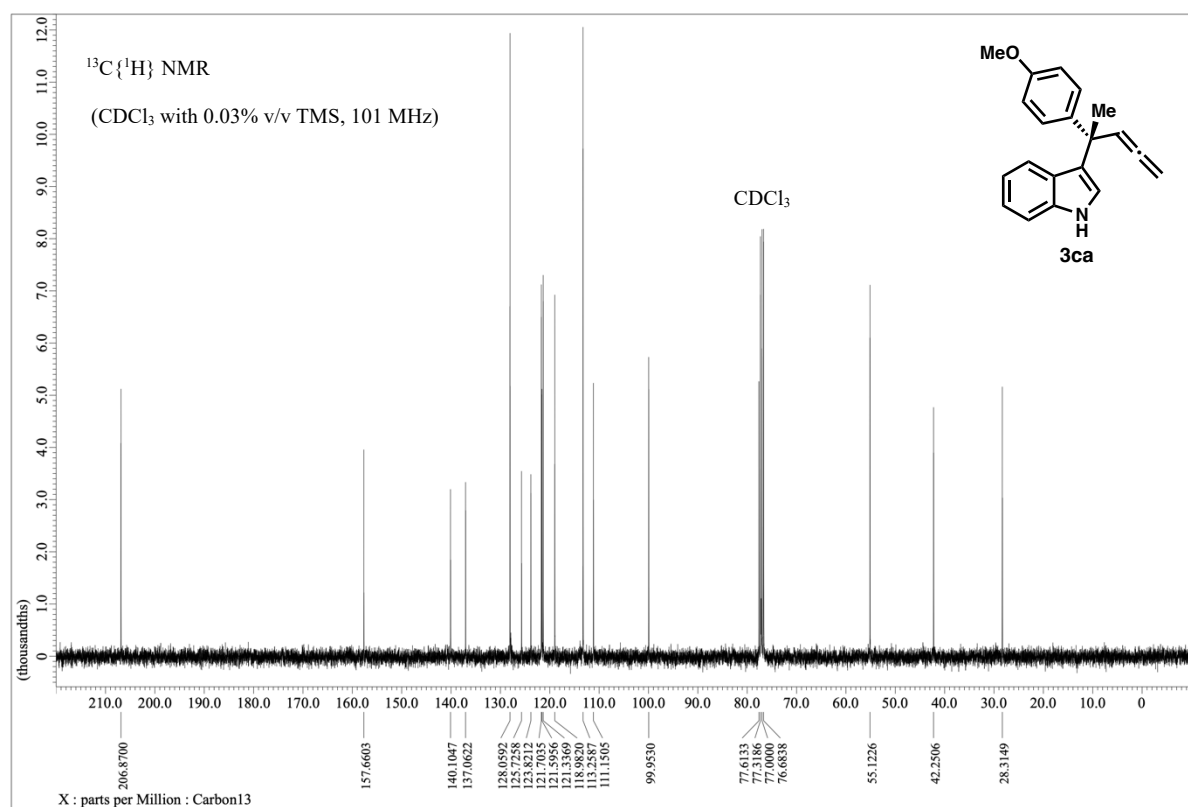

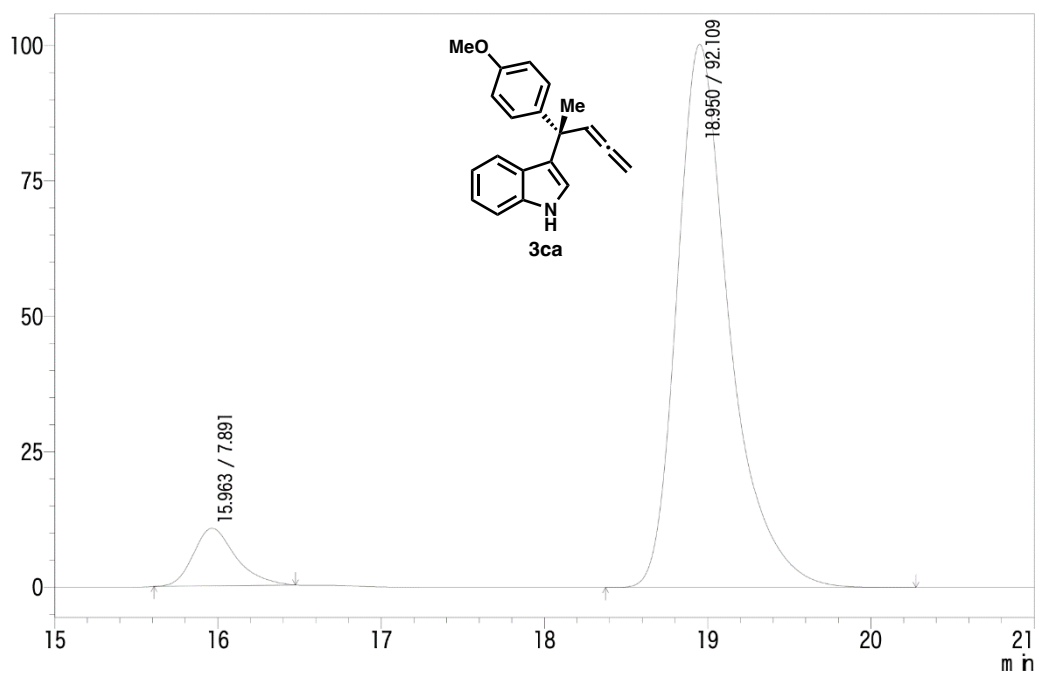

| peak# | retention time | area%   |
|-------|----------------|---------|
| 1     | 15.963         | 7.891   |
| 2     | 18.950         | 92.109  |
| Total |                | 100.000 |

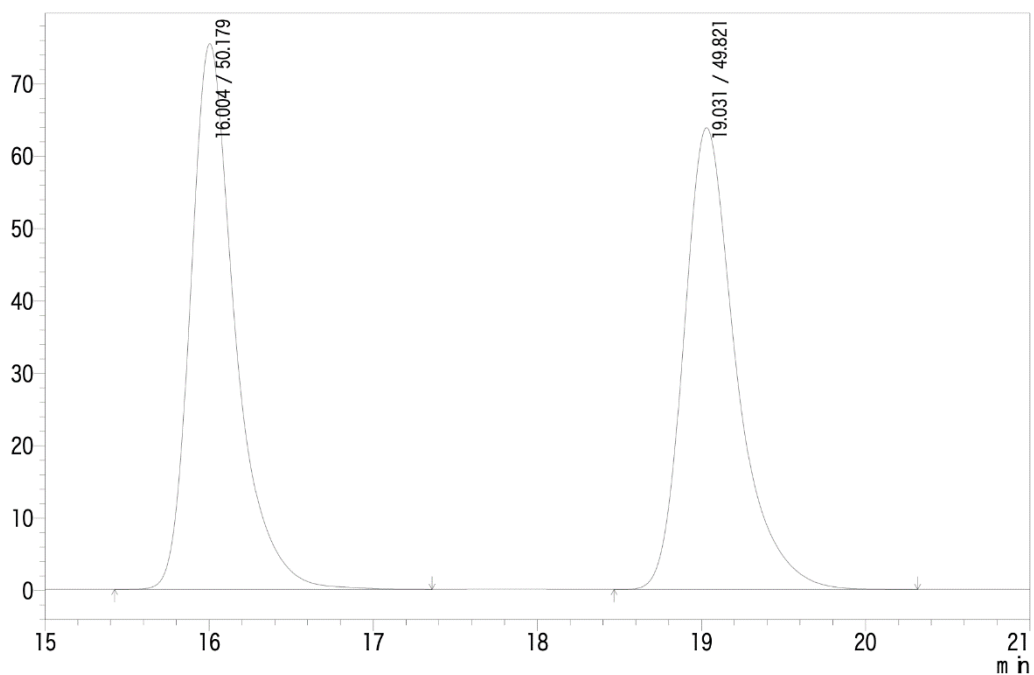

| peak# | retention time | area%   |
|-------|----------------|---------|
| 1     | 16.004         | 50.179  |
| 2     | 19.031         | 49.821  |
| Total |                | 100.000 |

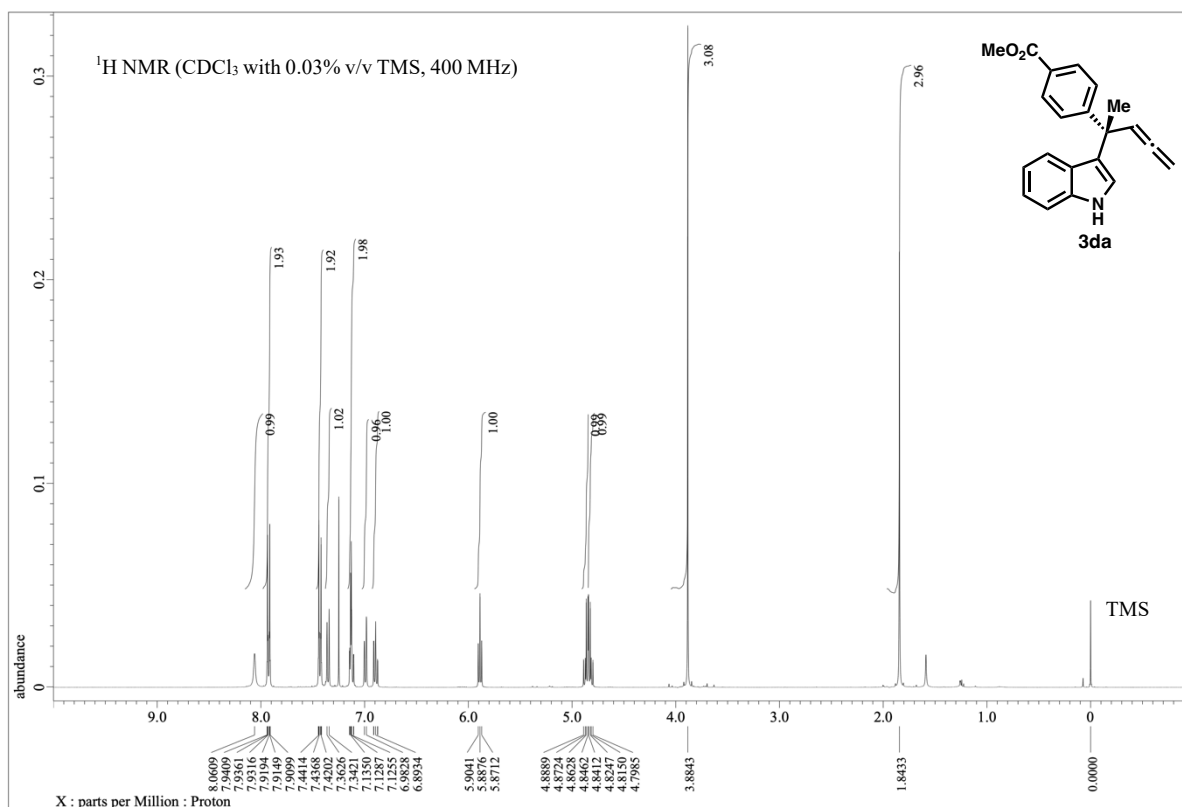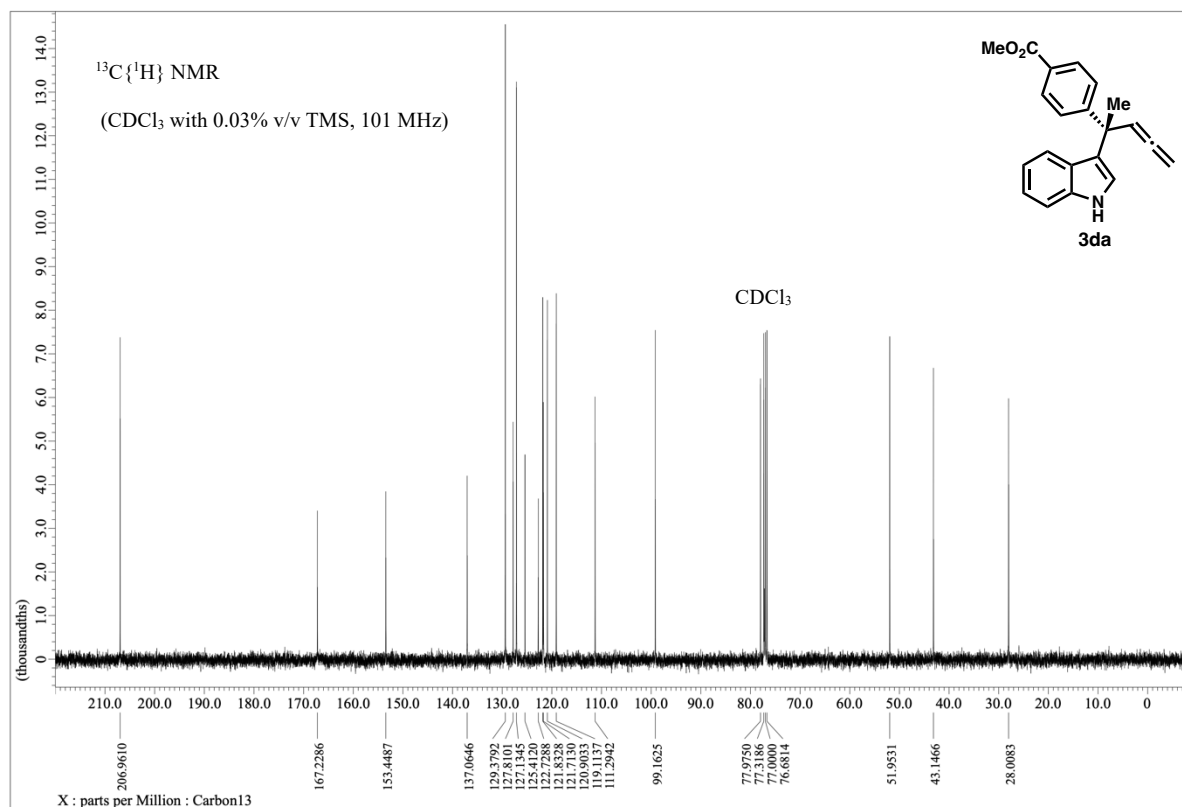

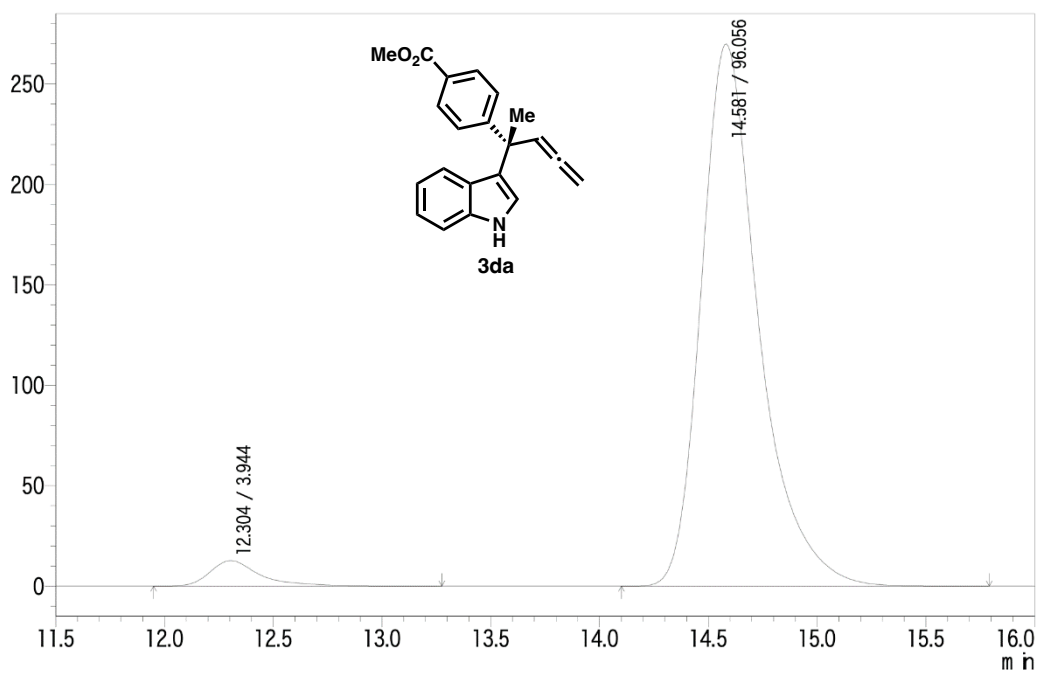

| peak# | retention time | area%   |
|-------|----------------|---------|
| 1     | 12.304         | 3.944   |
| 2     | 14.581         | 96.056  |
| Total |                | 100.000 |

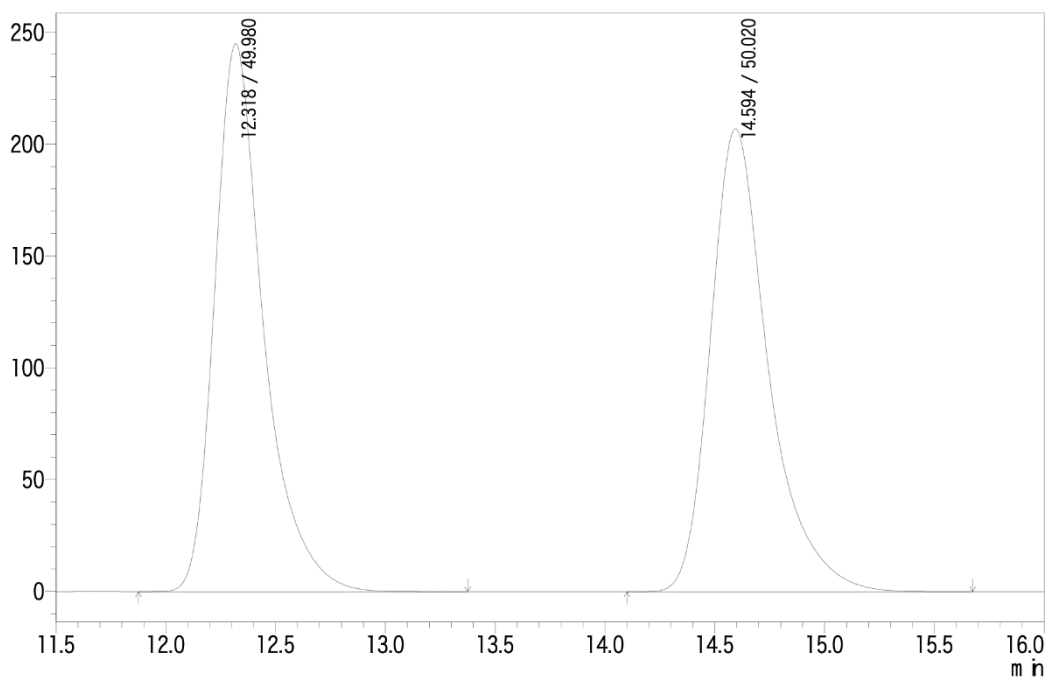

| peak# | retention time | area%   |
|-------|----------------|---------|
| 1     | 12.318         | 49.980  |
| 2     | 14.594         | 50.020  |
| Total |                | 100.000 |

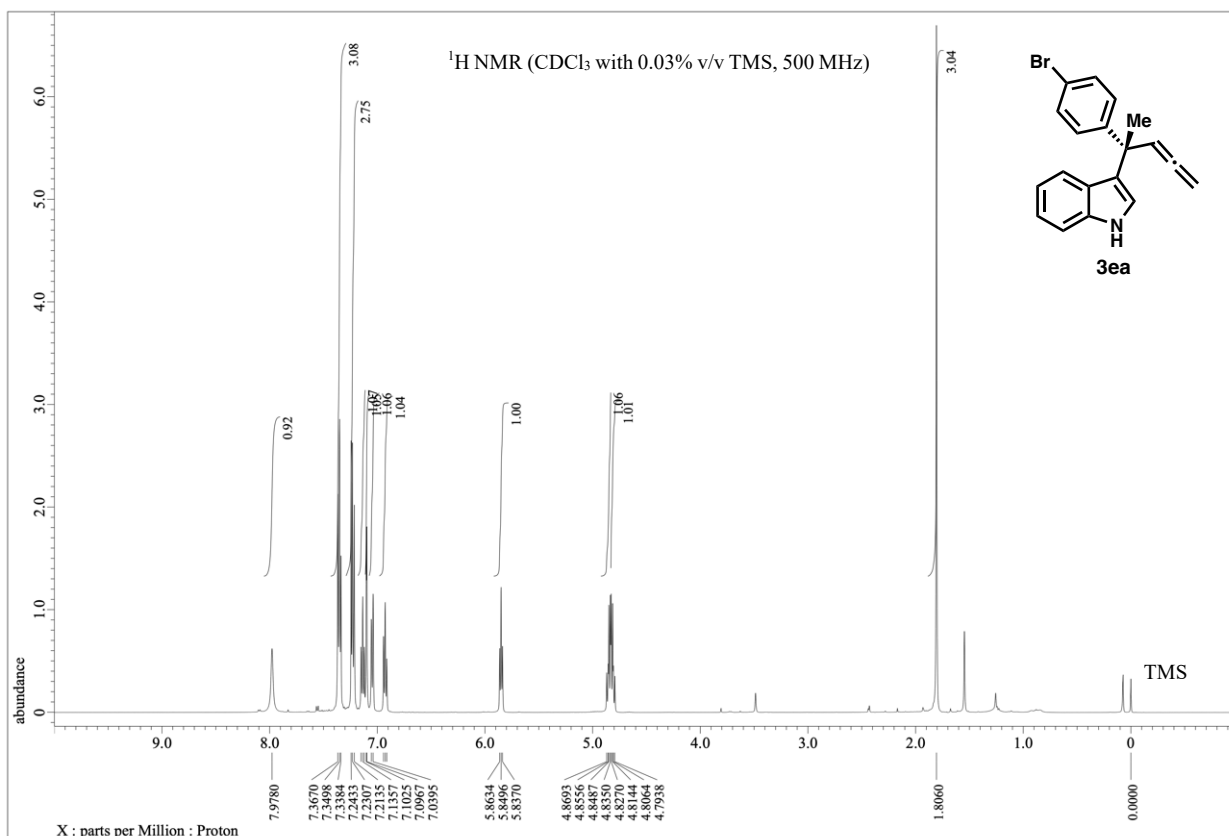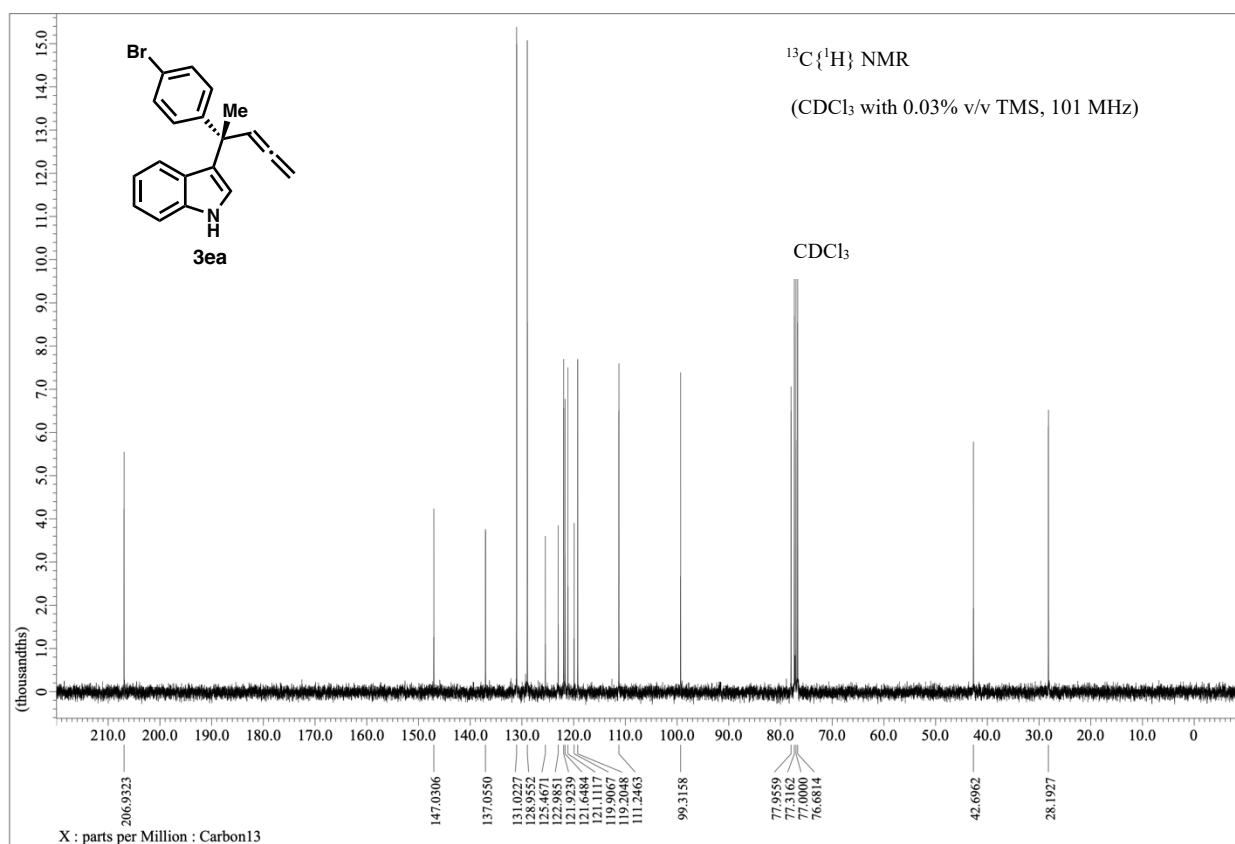

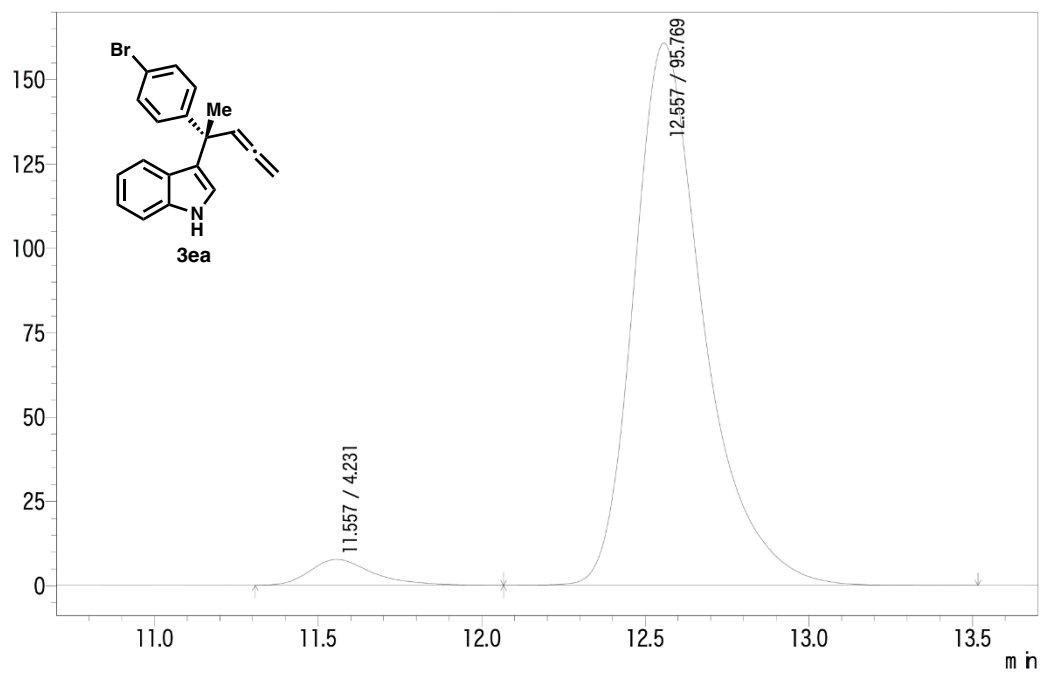

| peak# | retention time | area%   |
|-------|----------------|---------|
| 1     | 11.557         | 4.231   |
| 2     | 12.557         | 95.769  |
| Total |                | 100.000 |

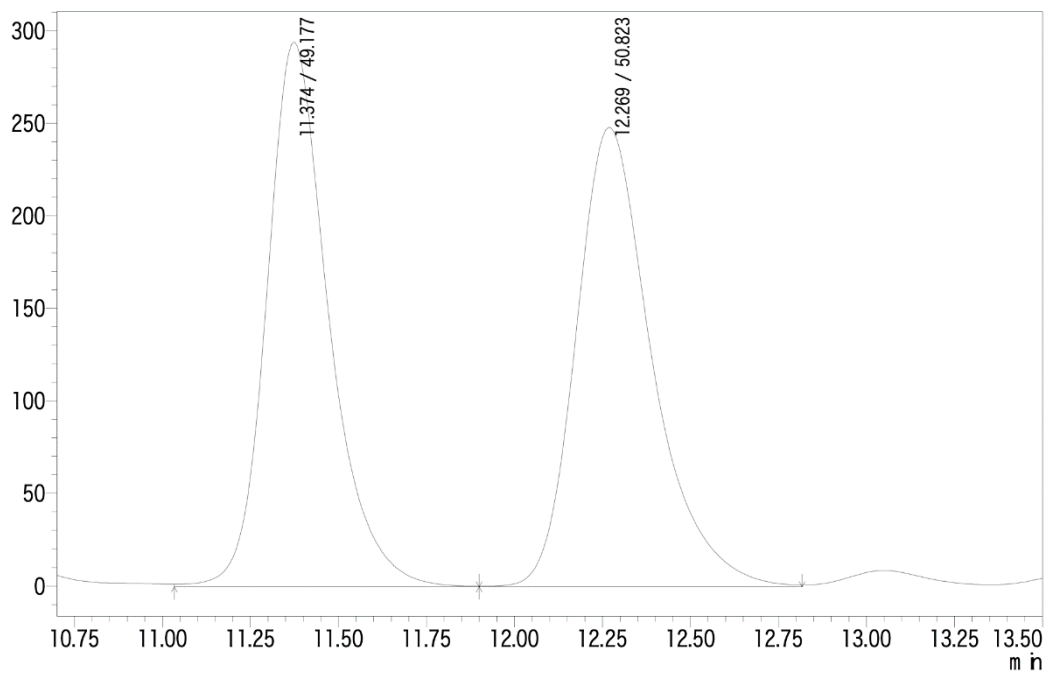

| peak# | retention time | area%   |
|-------|----------------|---------|
| 1     | 11.374         | 49.177  |
| 2     | 12.269         | 50.823  |
| Total |                | 100.000 |

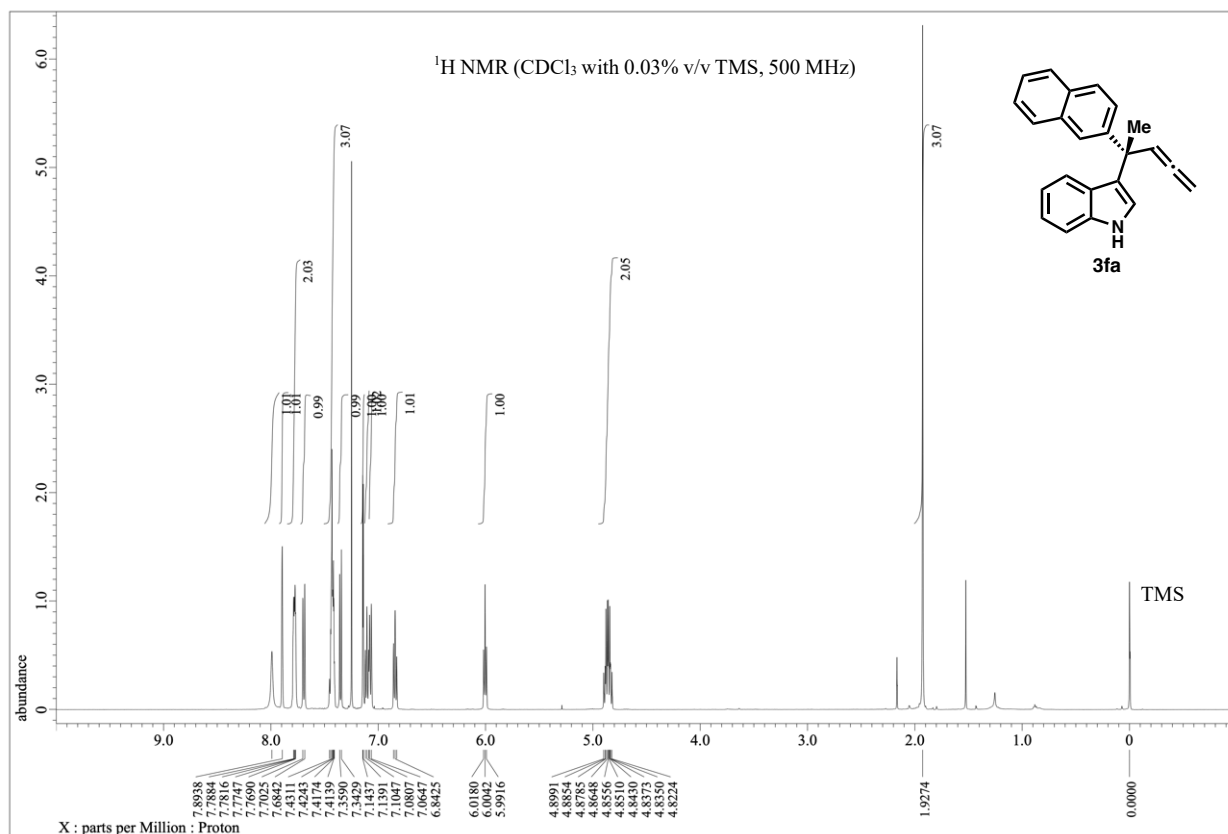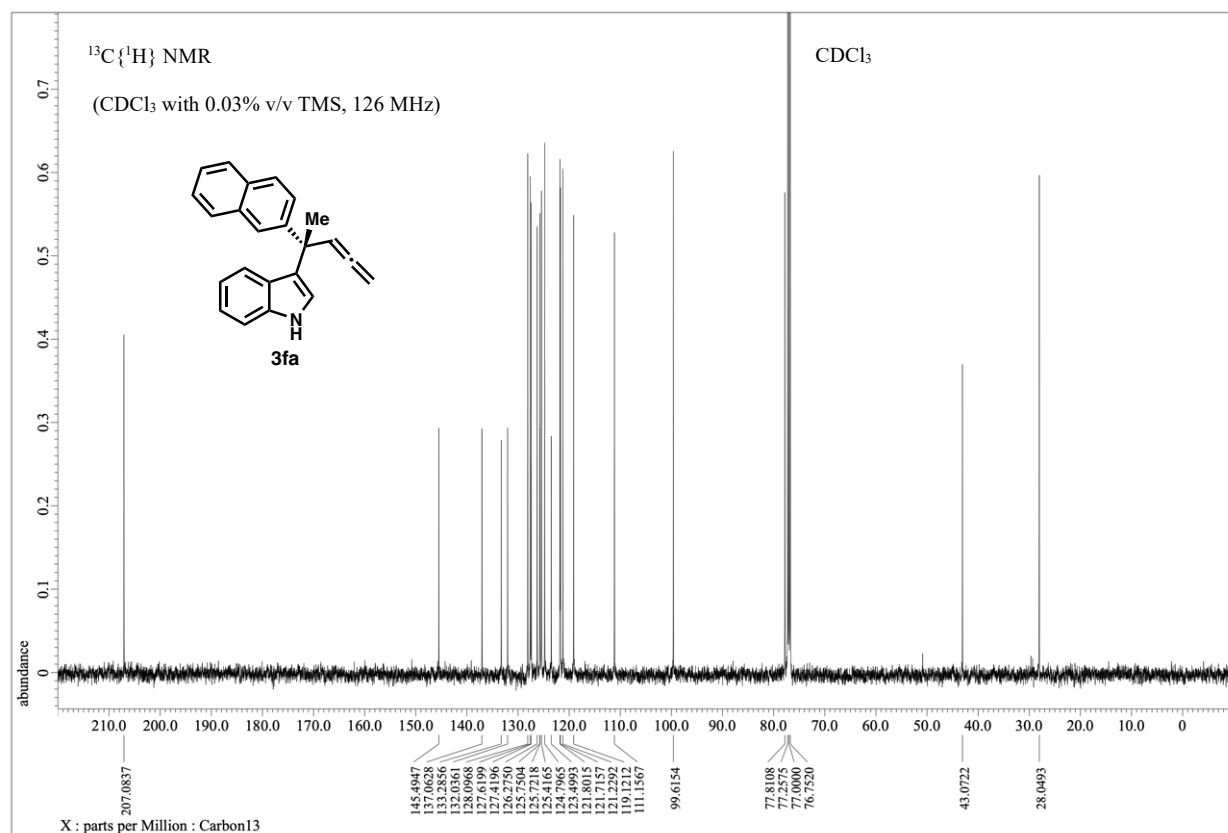

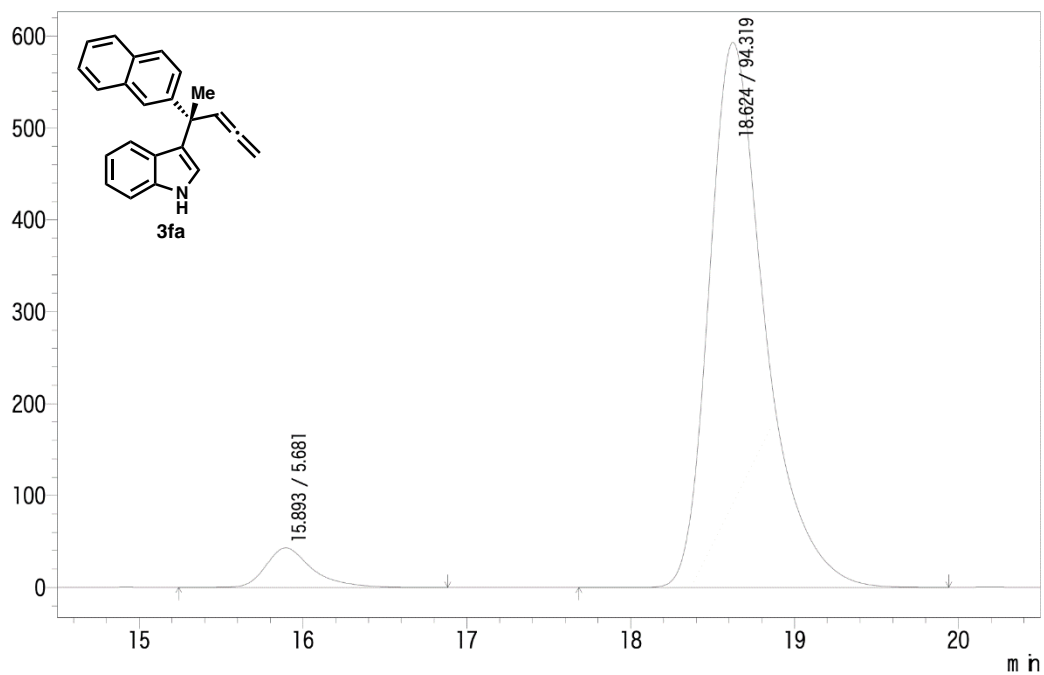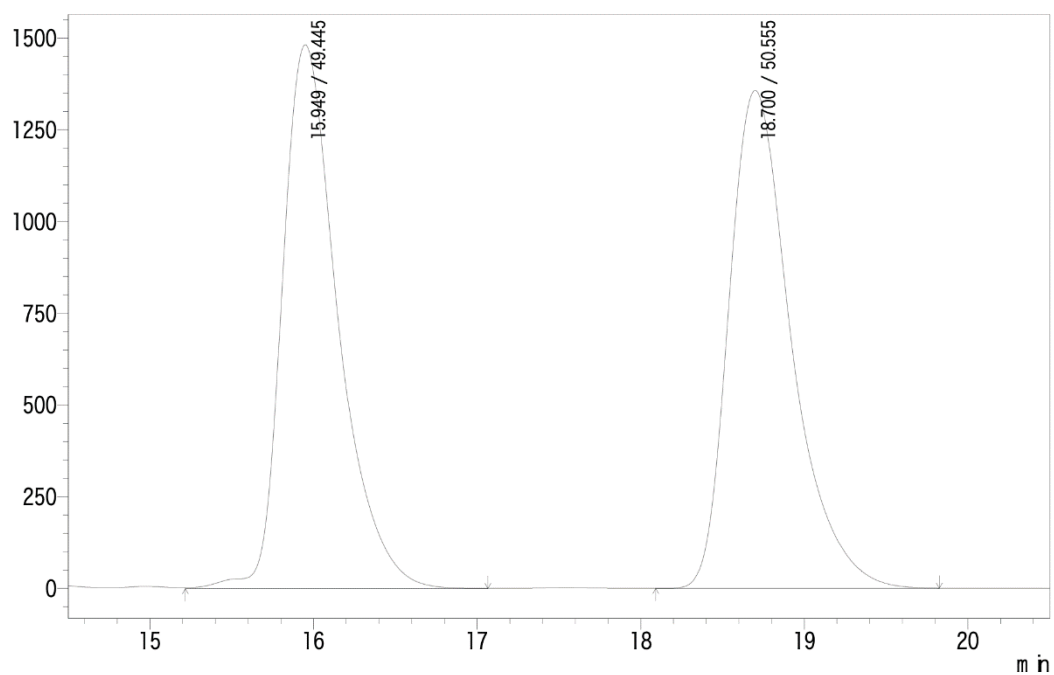



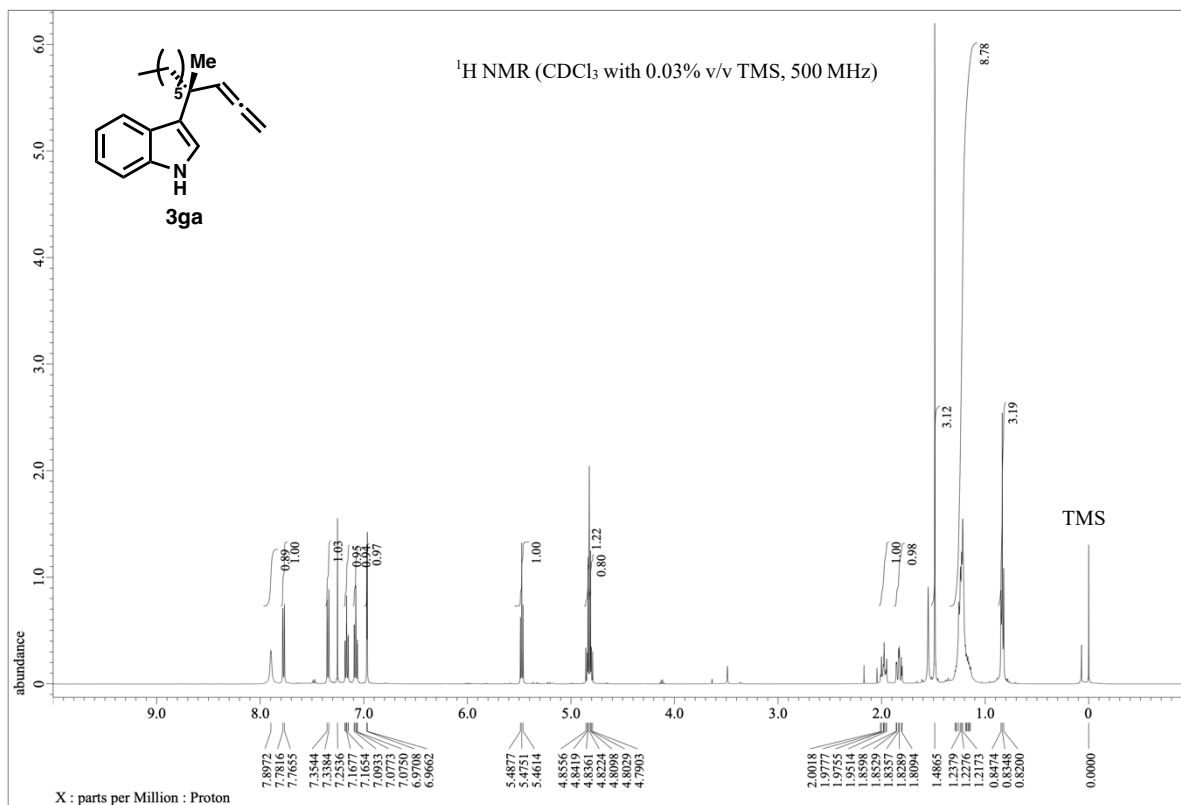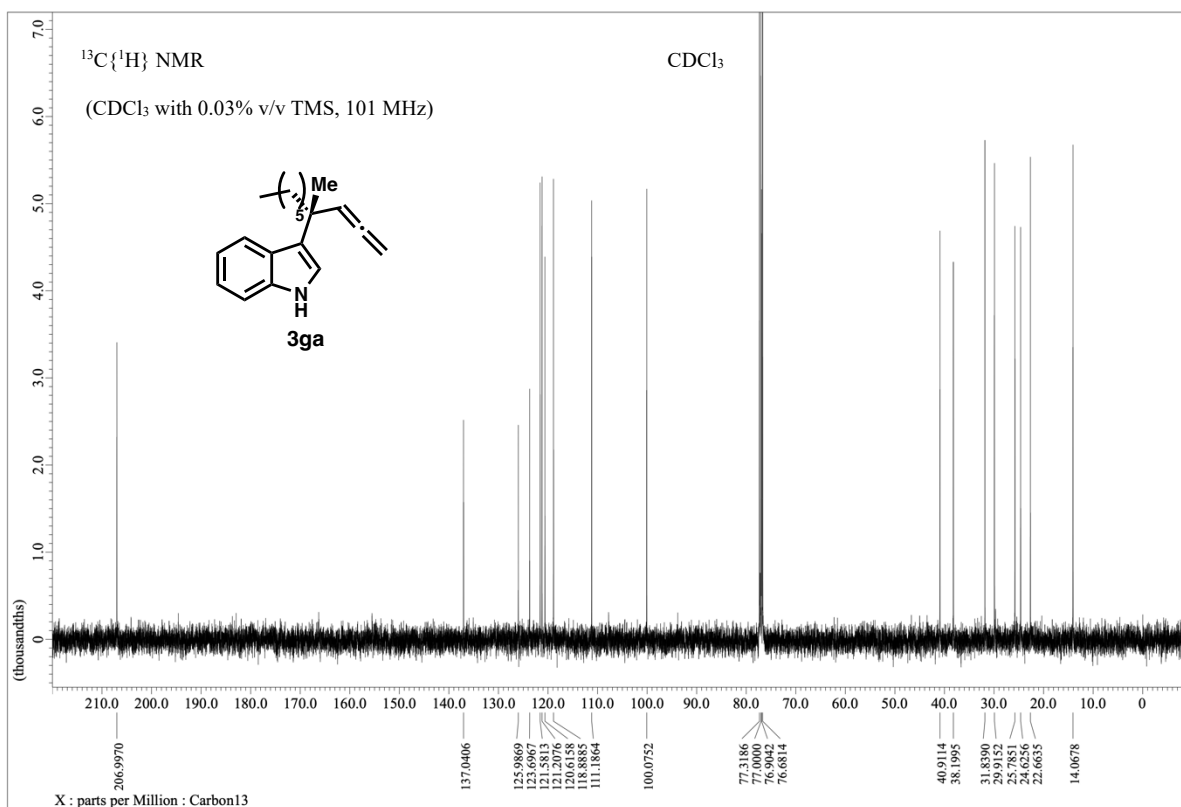

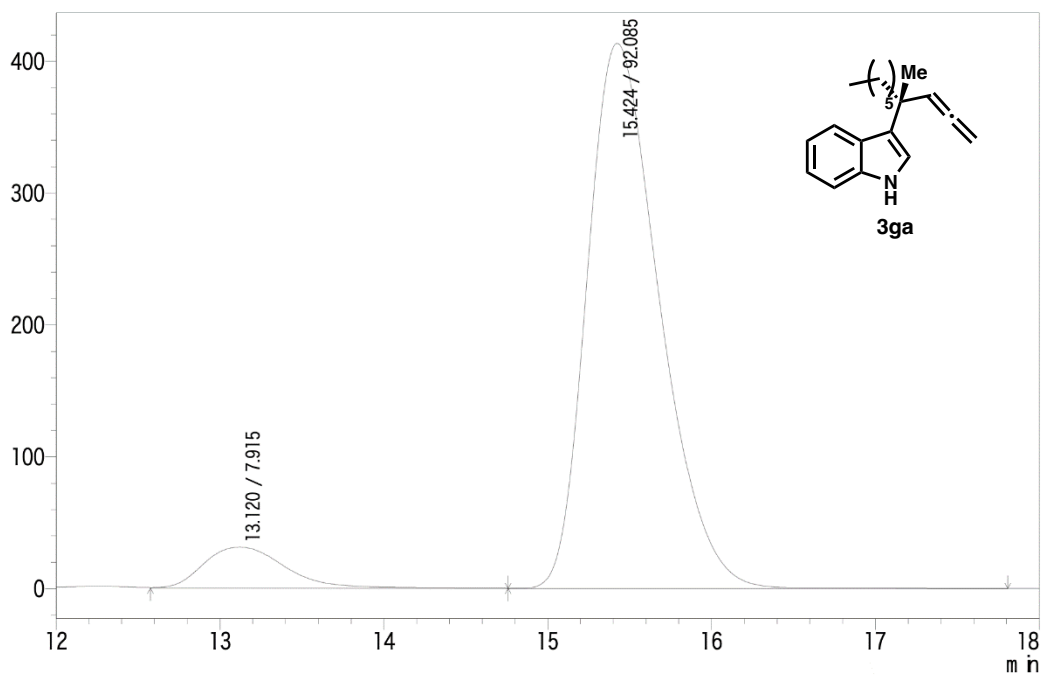

| peak# | retention time | area%   |
|-------|----------------|---------|
| 1     | 13.120         | 7.915   |
| 2     | 15.424         | 92.085  |
| Total |                | 100.000 |

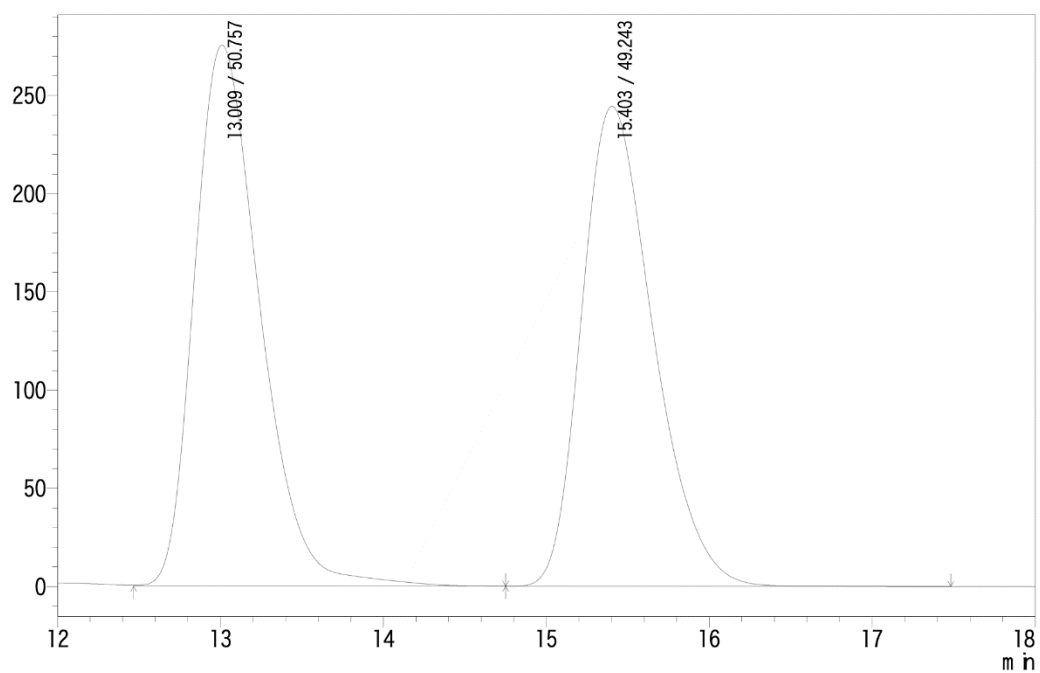

| peak# | retention time | area%   |
|-------|----------------|---------|
| 1     | 13.009         | 50.757  |
| 2     | 15.403         | 49.243  |
| Total |                | 100.000 |

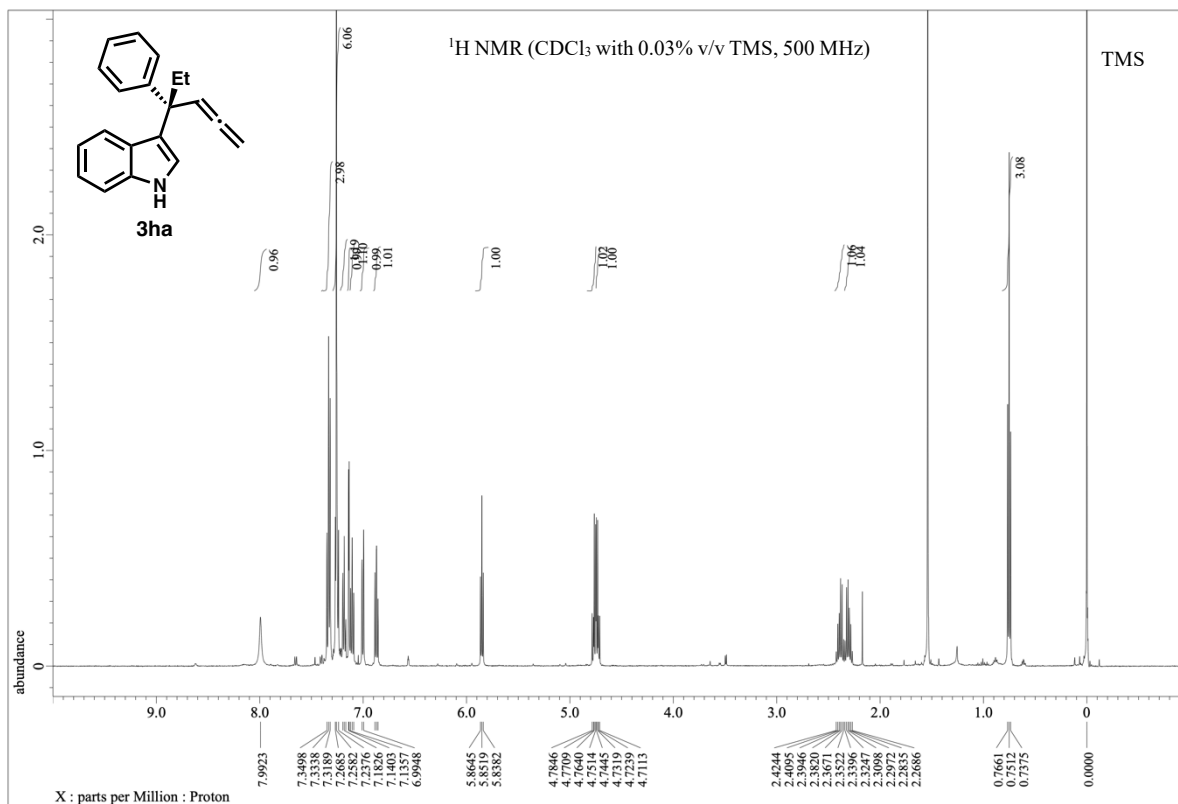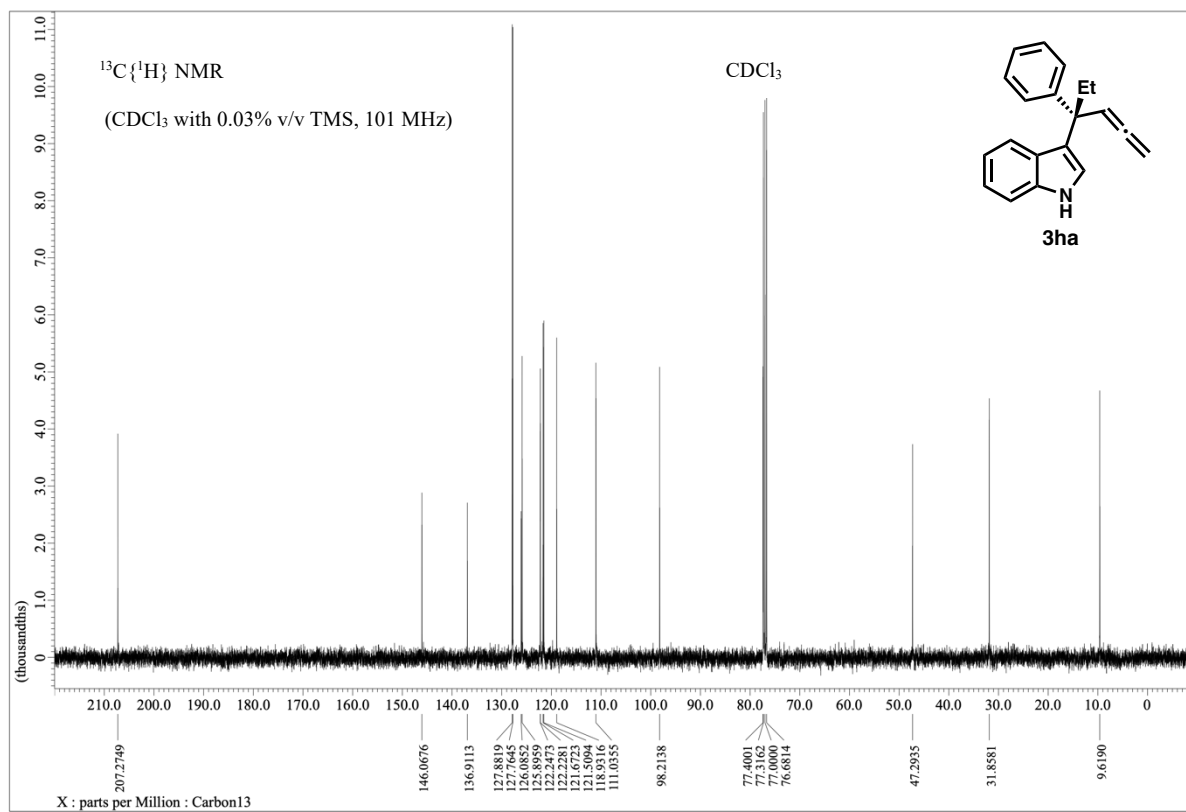

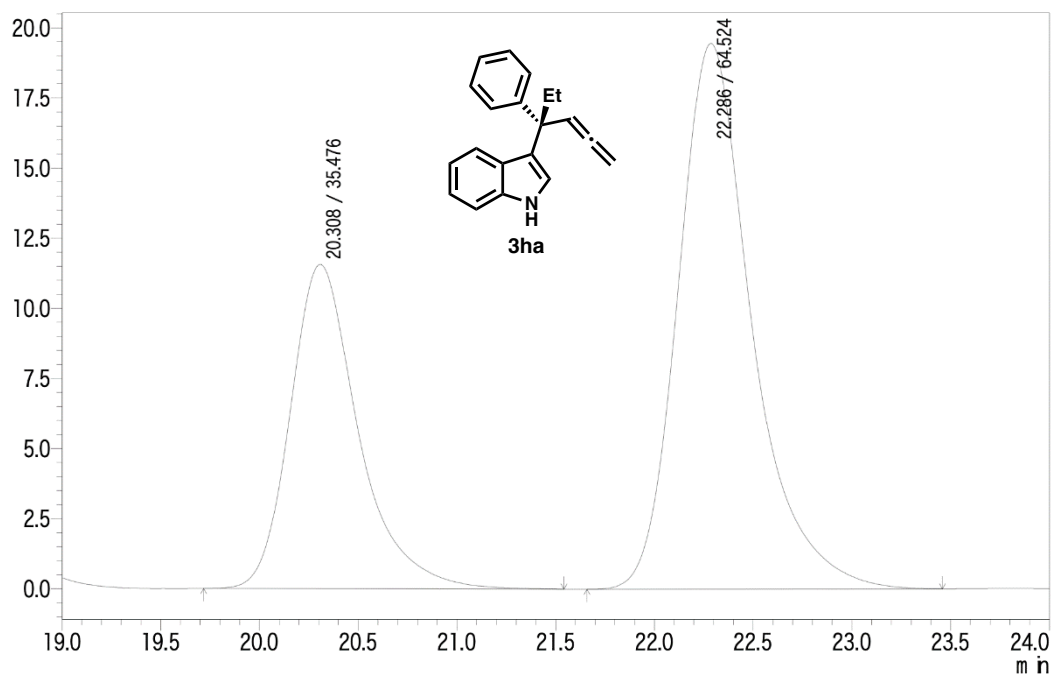

| peak# | retention time | area%   |
|-------|----------------|---------|
| 1     | 20.308         | 35.476  |
| 2     | 22.286         | 64.524  |
| Total |                | 100.000 |

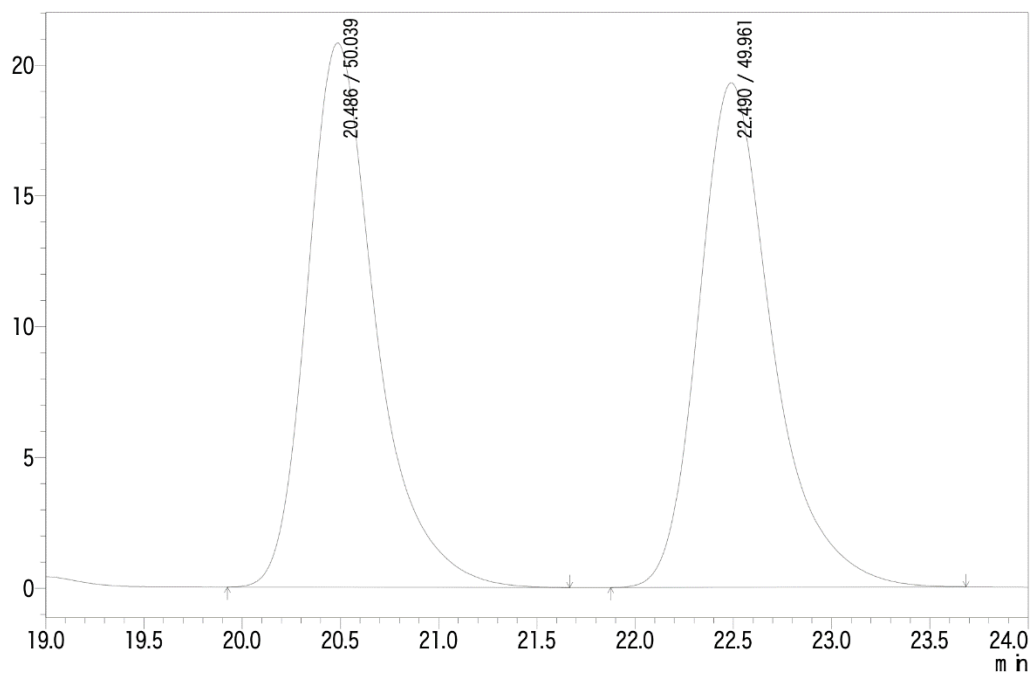

| peak# | retention time | area%   |
|-------|----------------|---------|
| 1     | 20.486         | 50.039  |
| 2     | 22.490         | 49.961  |
| Total |                | 100.000 |

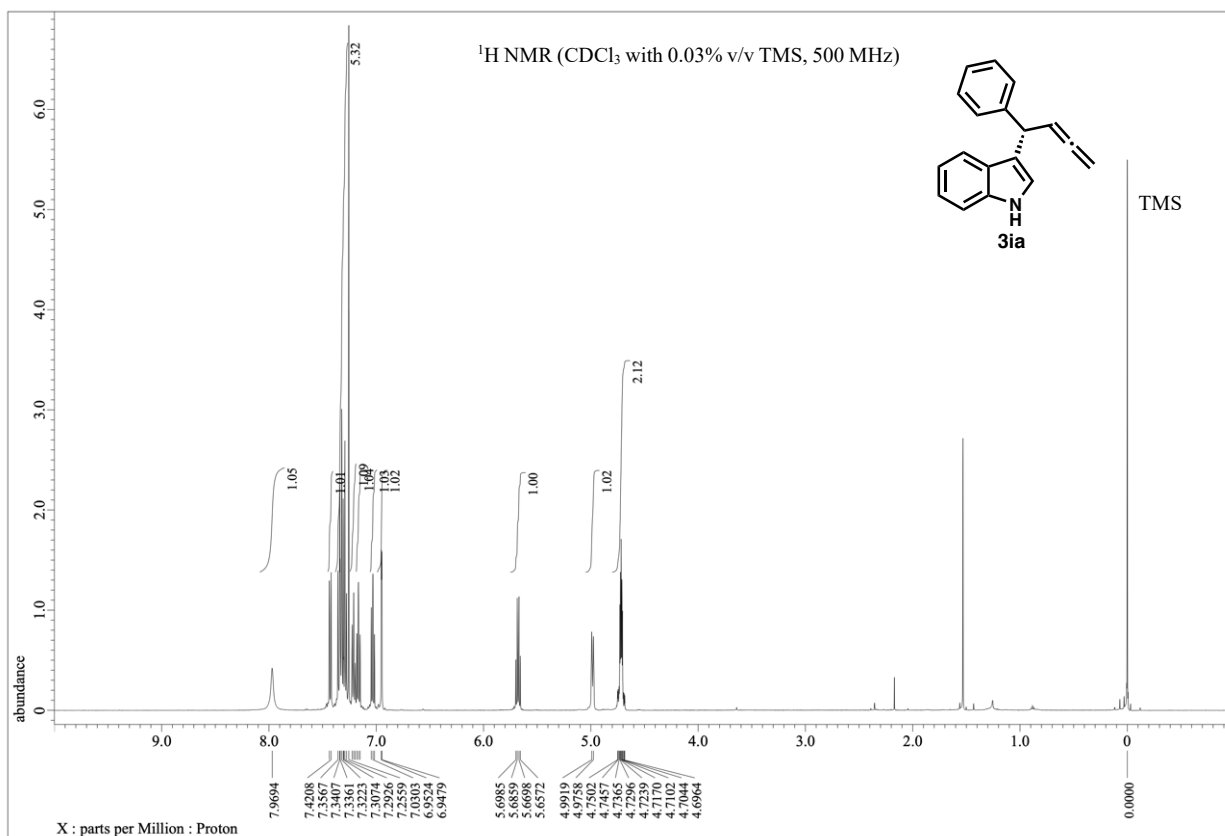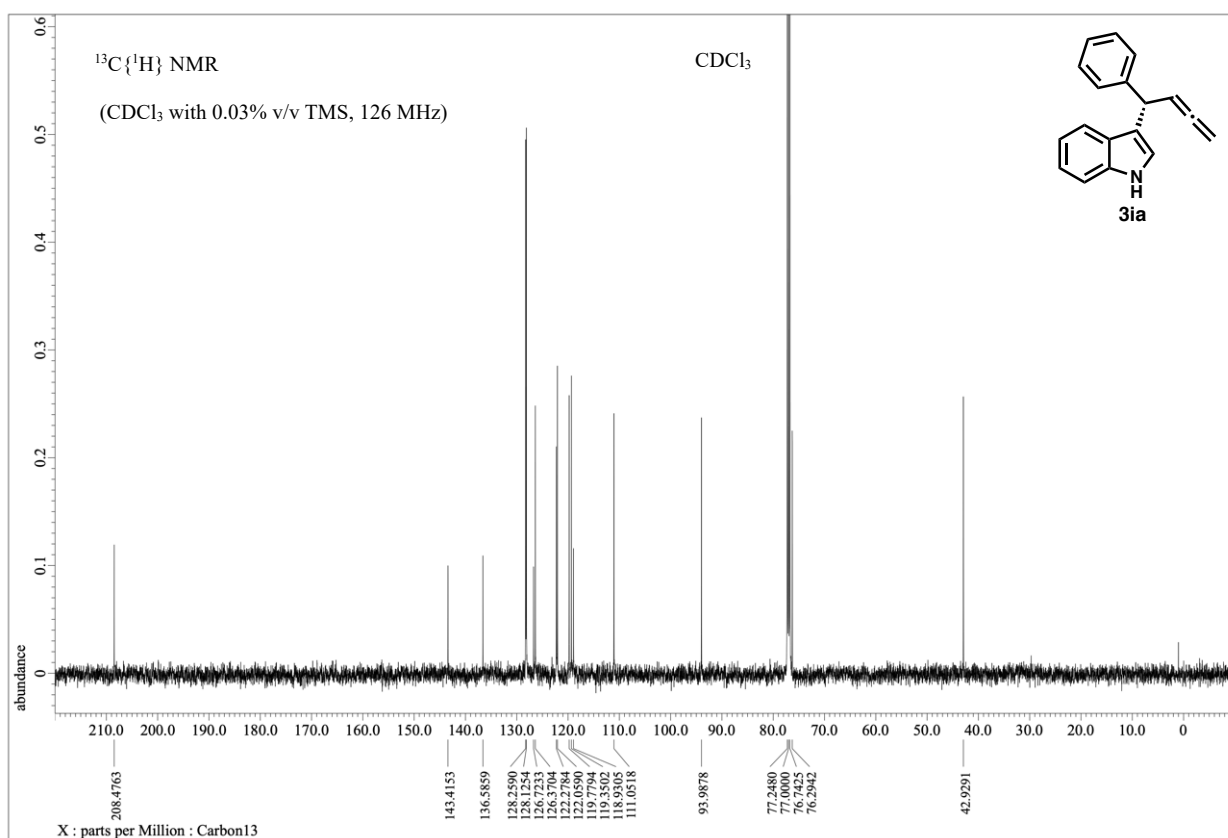

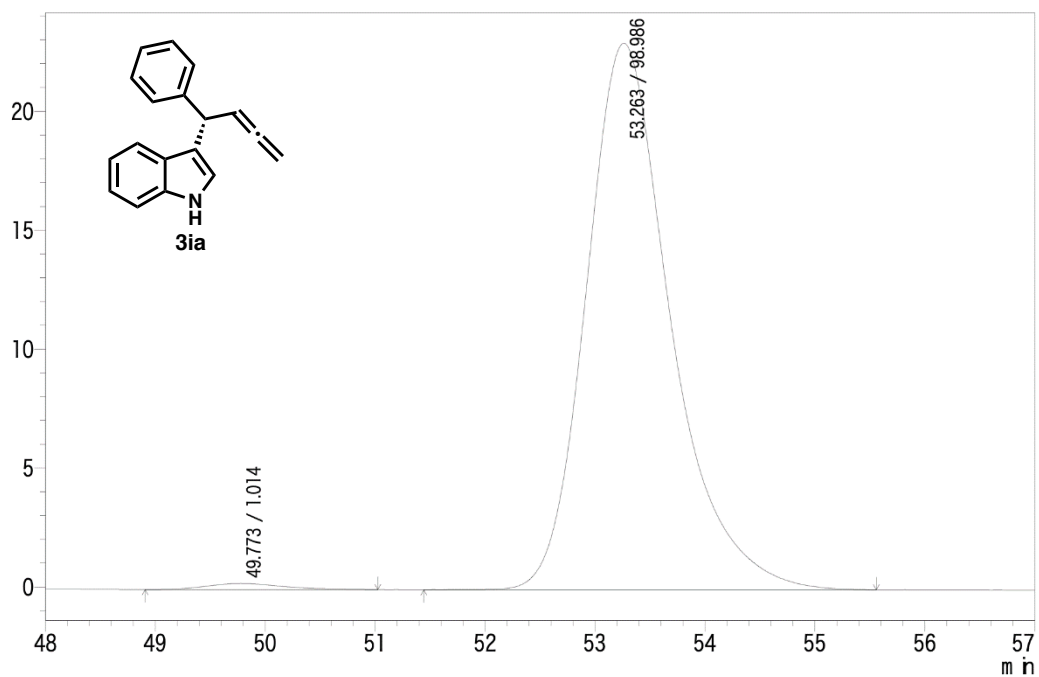

| peak# | retention time | area%   |
|-------|----------------|---------|
| 1     | 49.773         | 1.014   |
| 2     | 53.263         | 98.986  |
| Total |                | 100.000 |

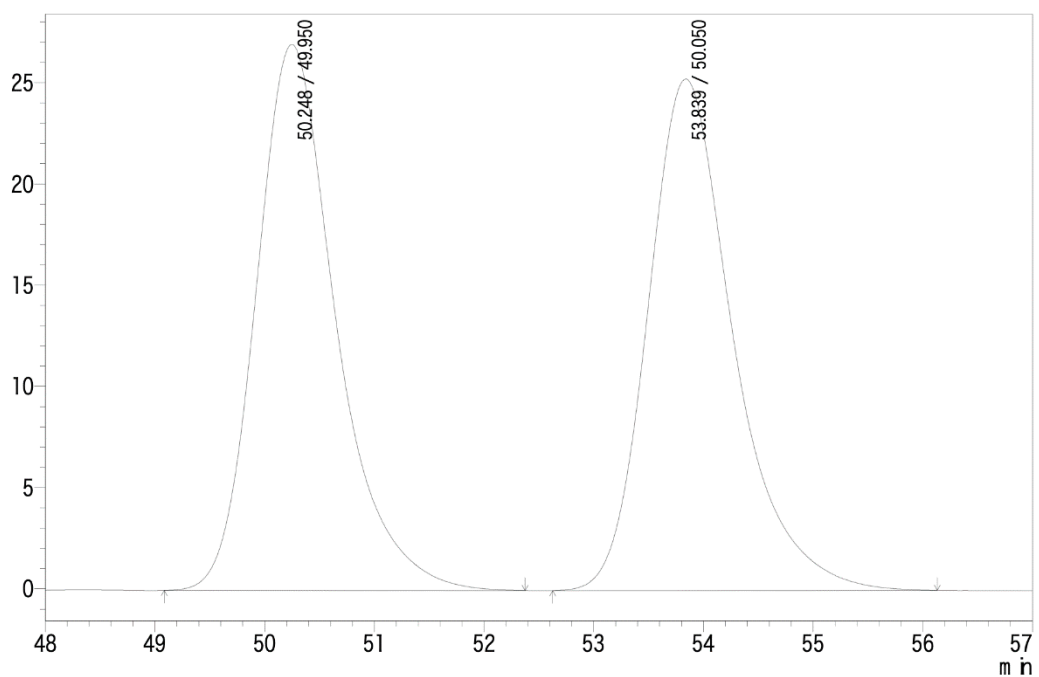

| peak# | retention time | area%   |
|-------|----------------|---------|
| 1     | 50.248         | 49.950  |
| 2     | 53.839         | 50.050  |
| Total |                | 100.000 |

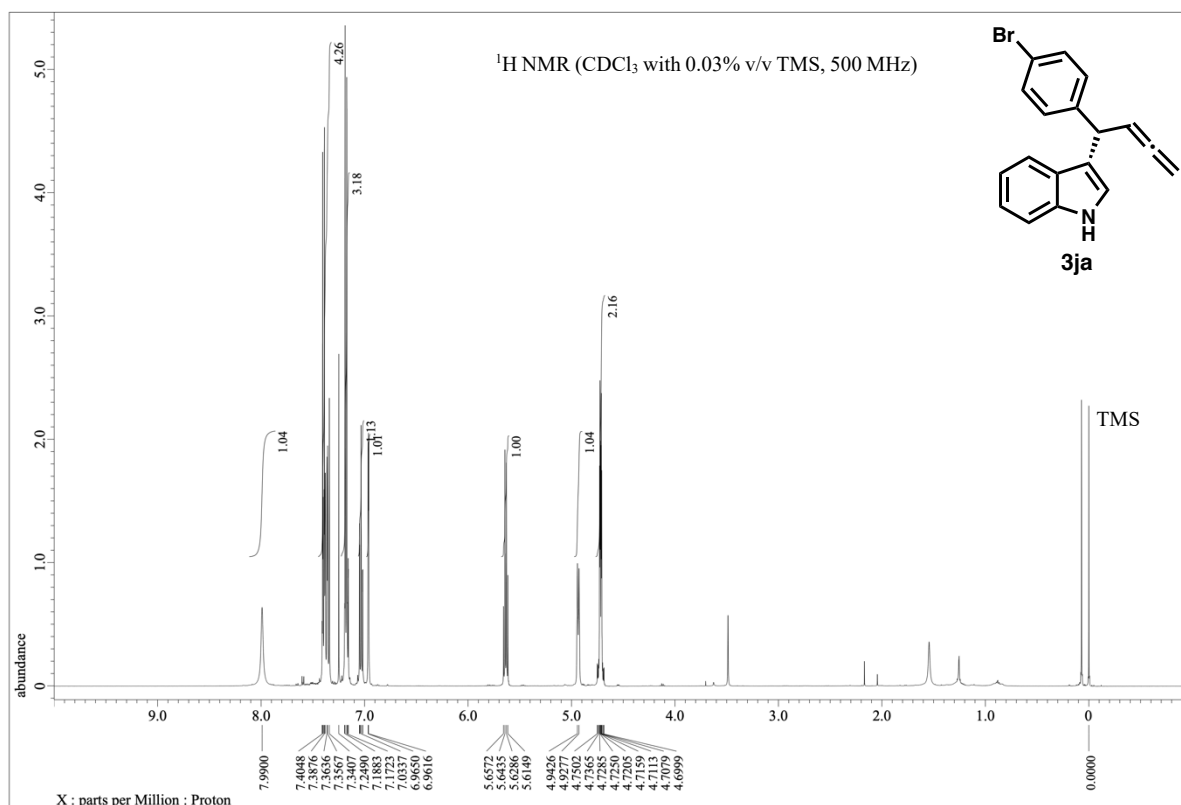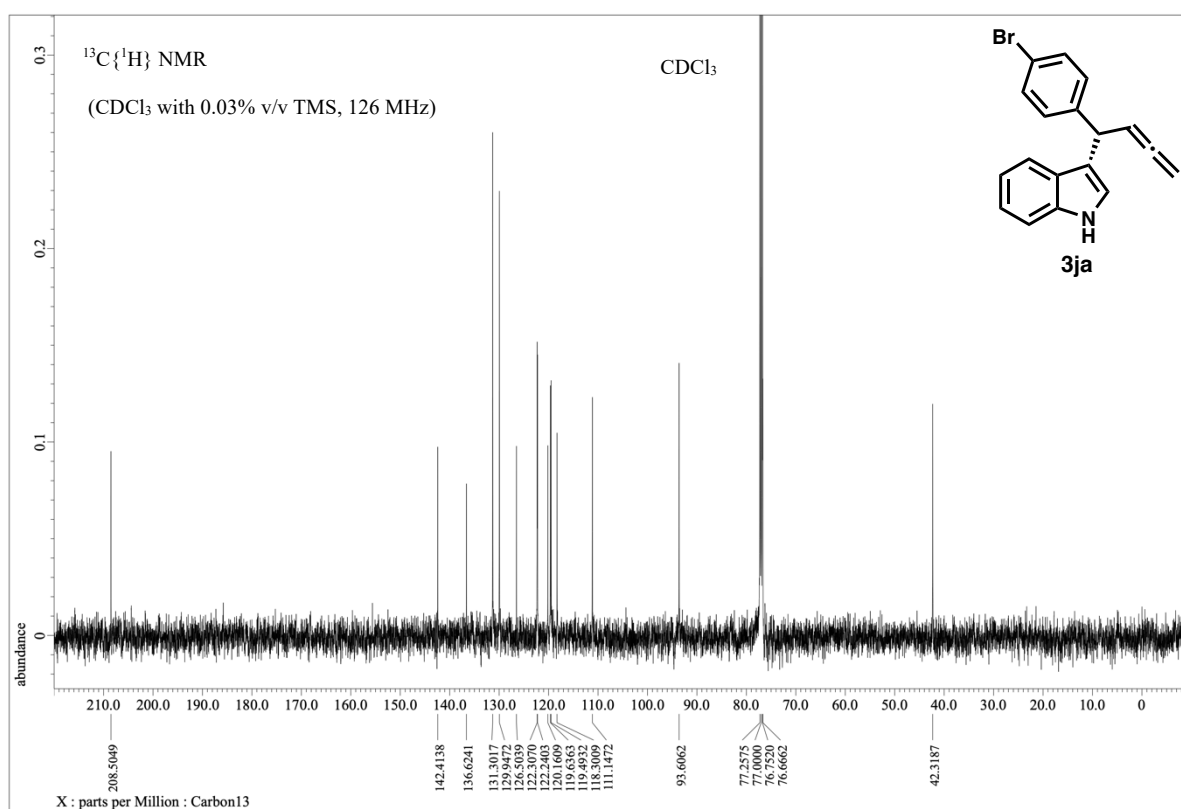

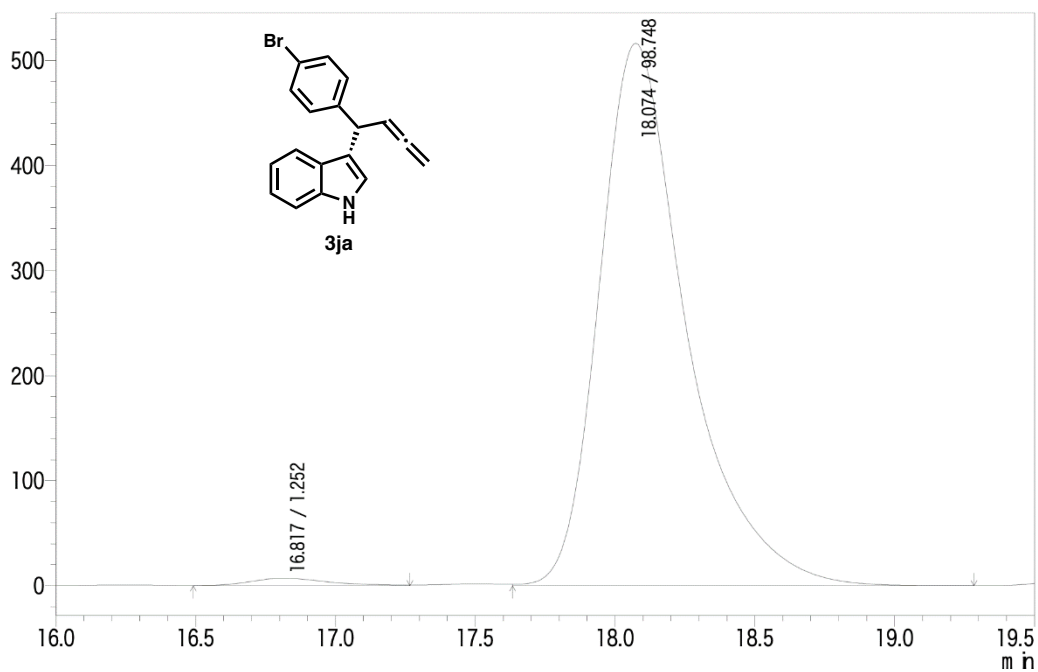

| peak# | retention time | area%   |
|-------|----------------|---------|
| 1     | 16.817         | 1.252   |
| 2     | 18.074         | 98.748  |
| Total |                | 100.000 |

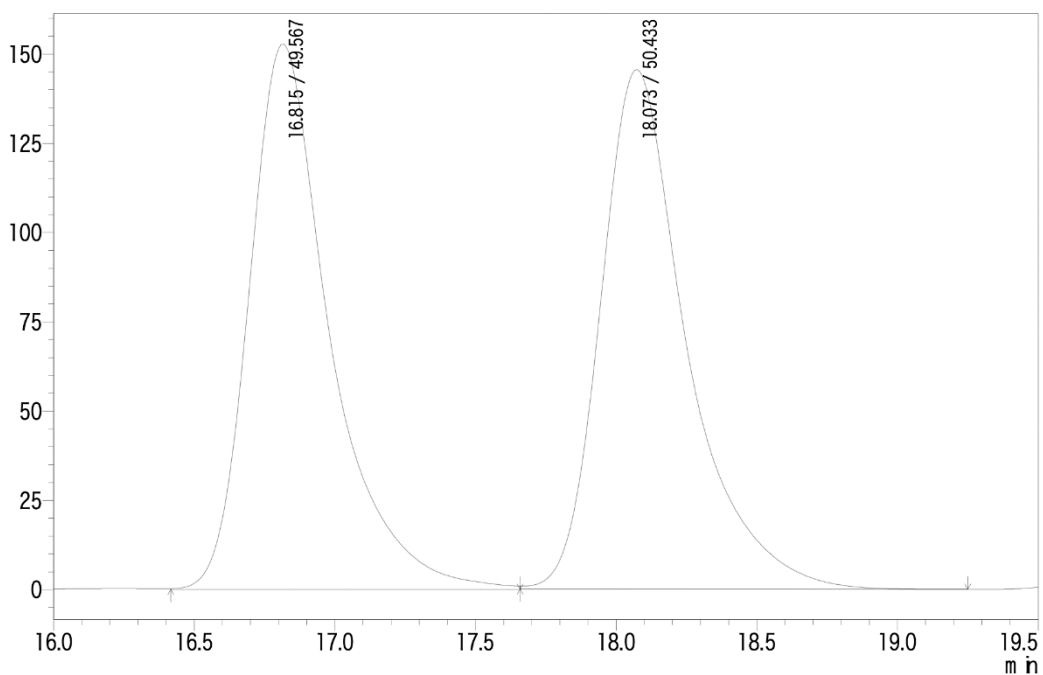

| peak# | retention time | area%   |
|-------|----------------|---------|
| 1     | 16.815         | 49.567  |
| 2     | 18.073         | 50.433  |
| Total |                | 100.000 |



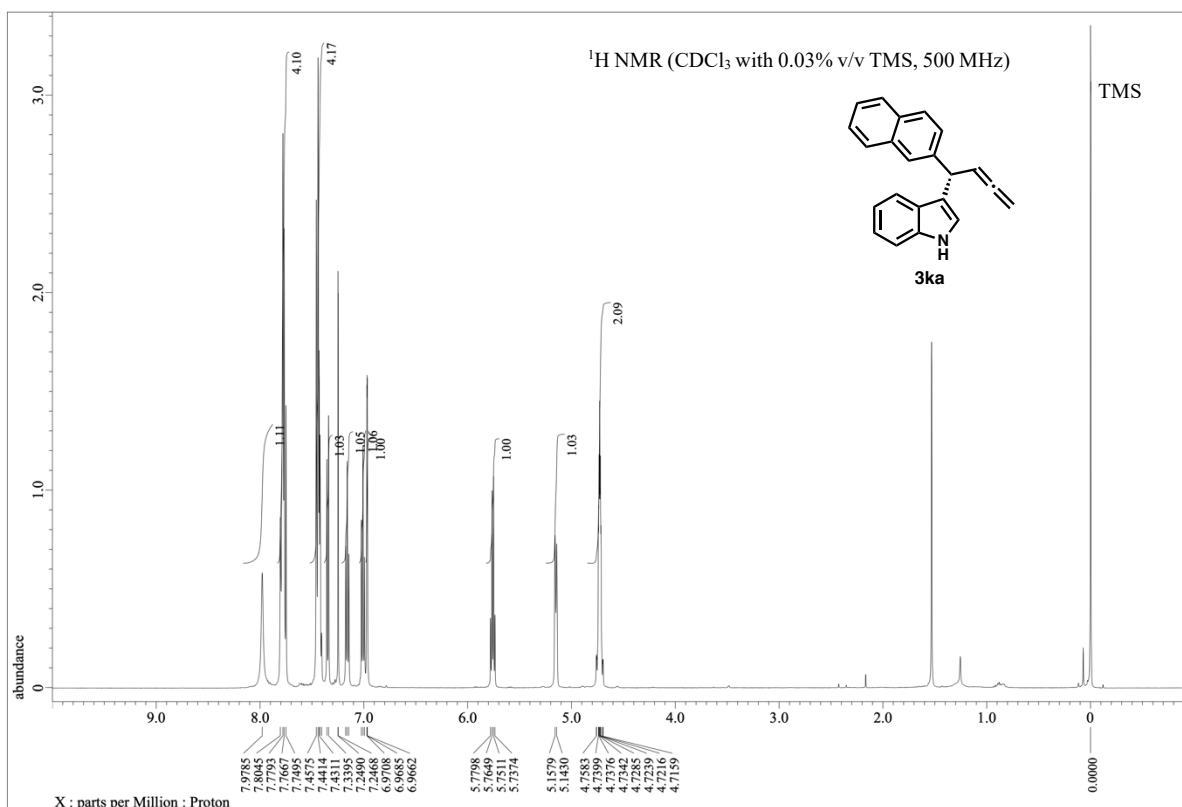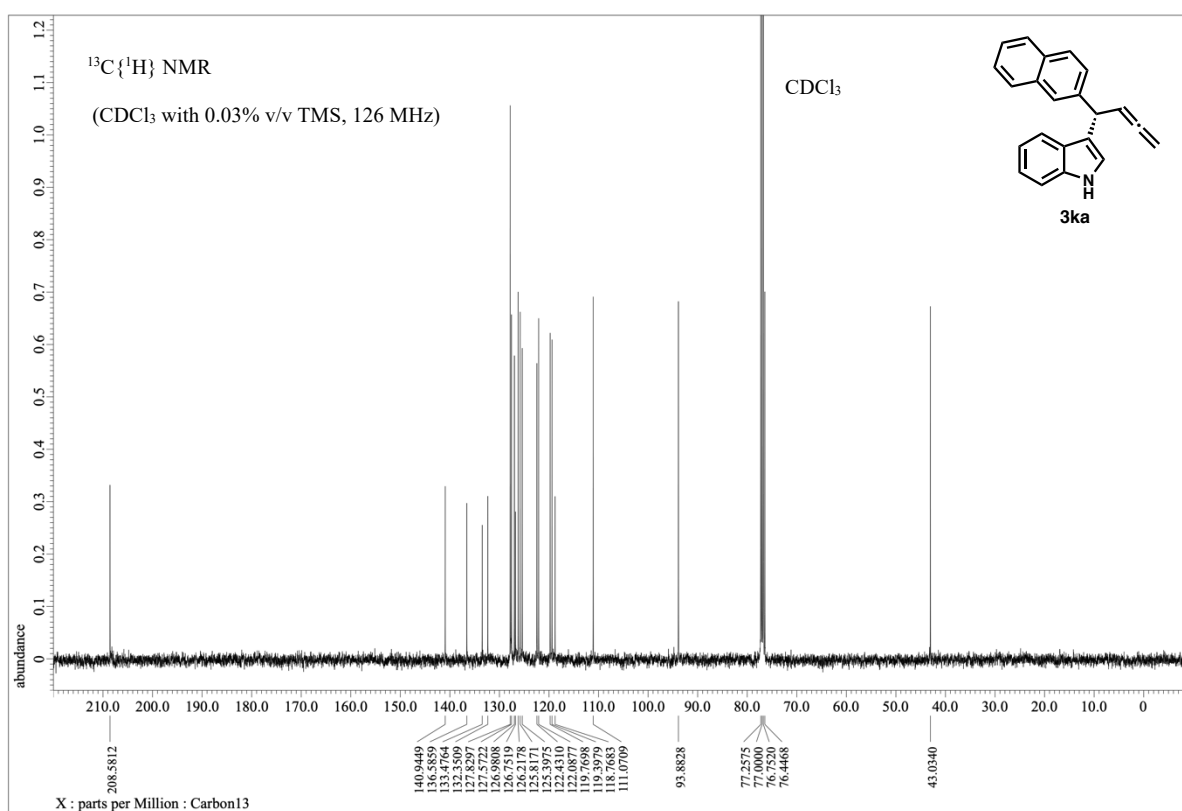

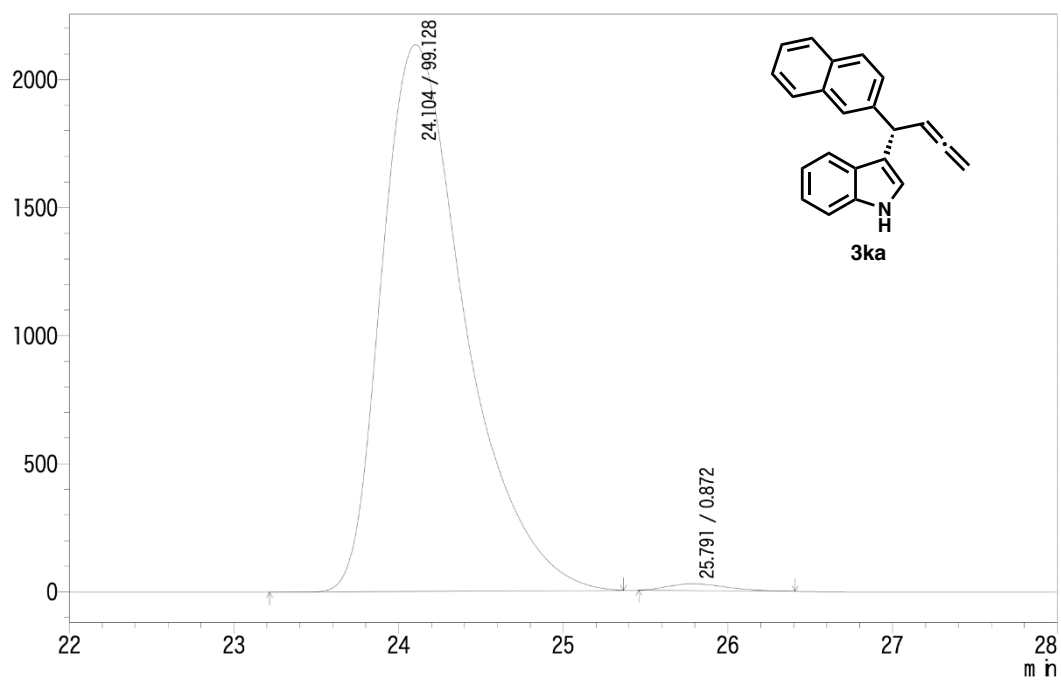

| peak# | retention time | area%   |
|-------|----------------|---------|
| 1     | 24.104         | 99.128  |
| 2     | 25.791         | 0.872   |
| Total |                | 100.000 |

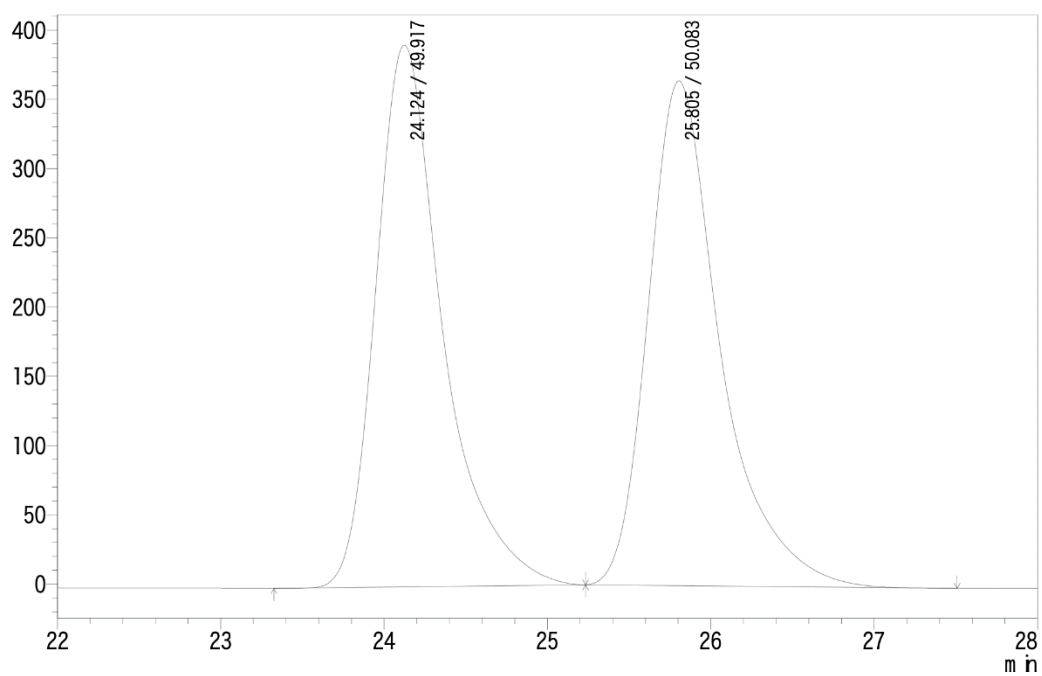

| peak# | retention time | area%   |
|-------|----------------|---------|
| 1     | 24.124         | 49.917  |
| 2     | 25.805         | 50.083  |
| Total |                | 100.000 |

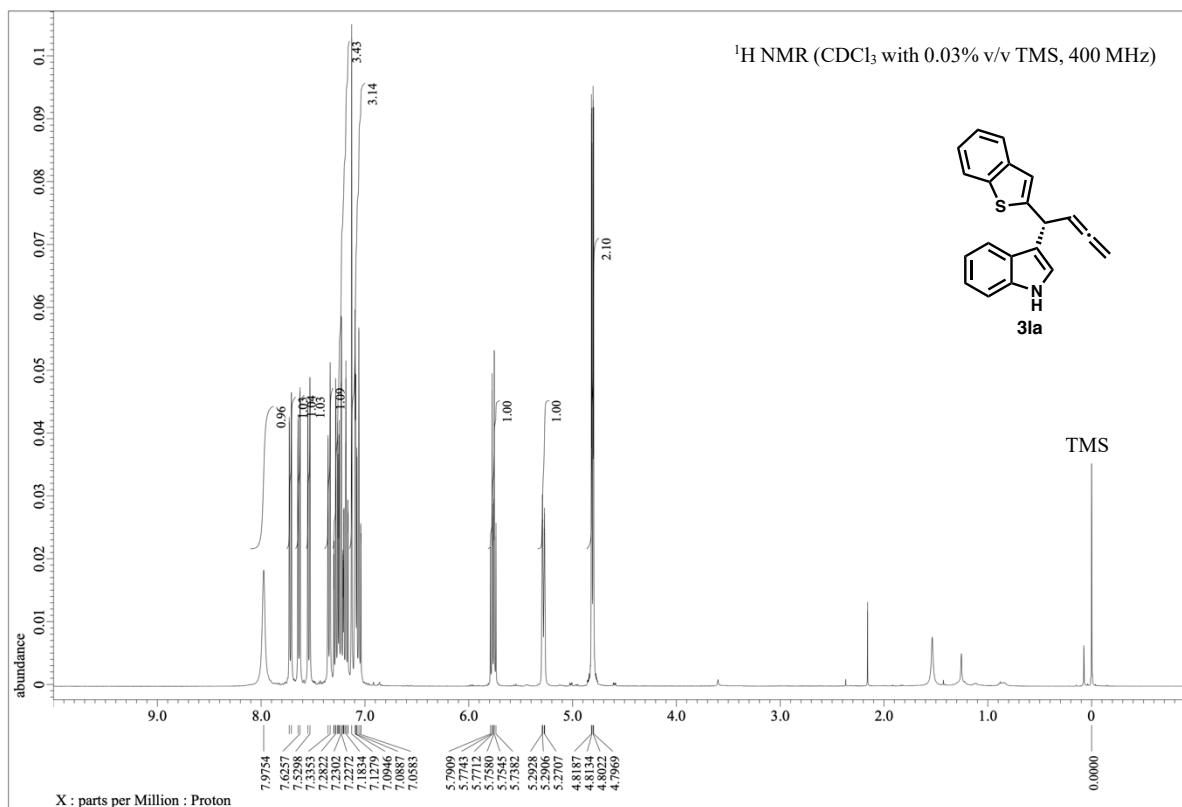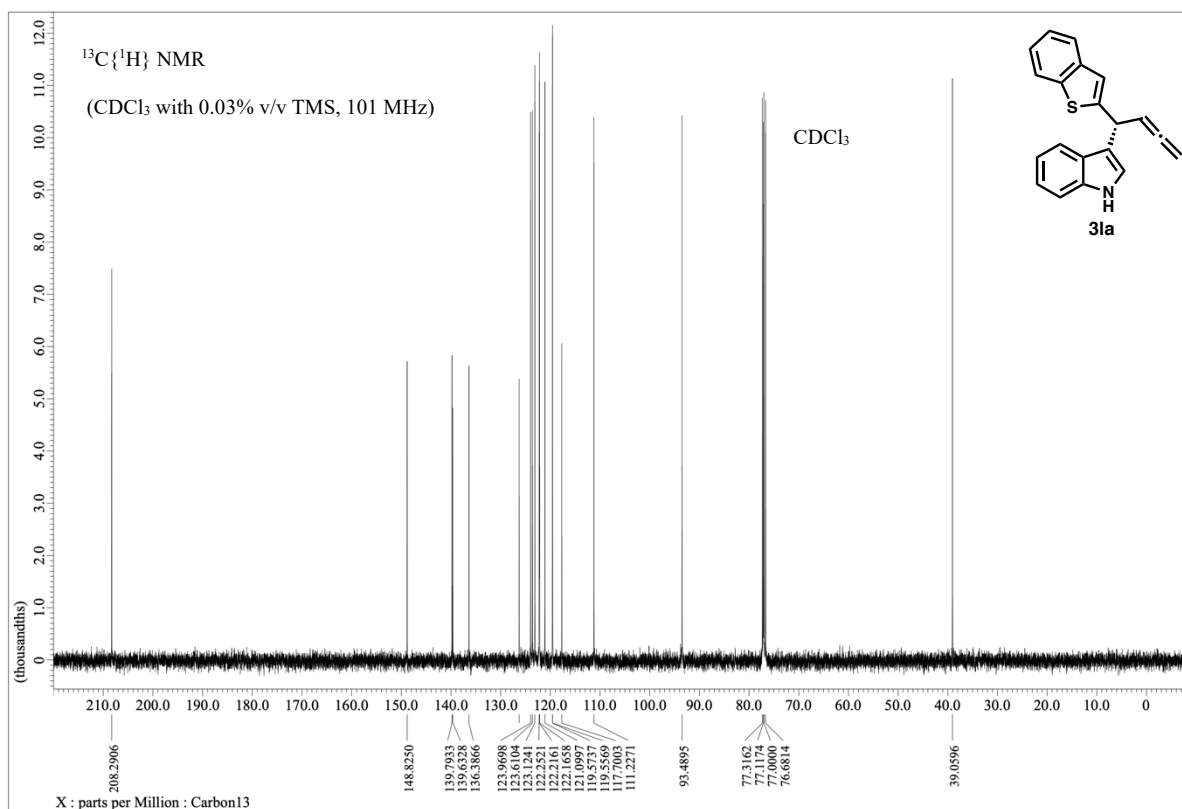

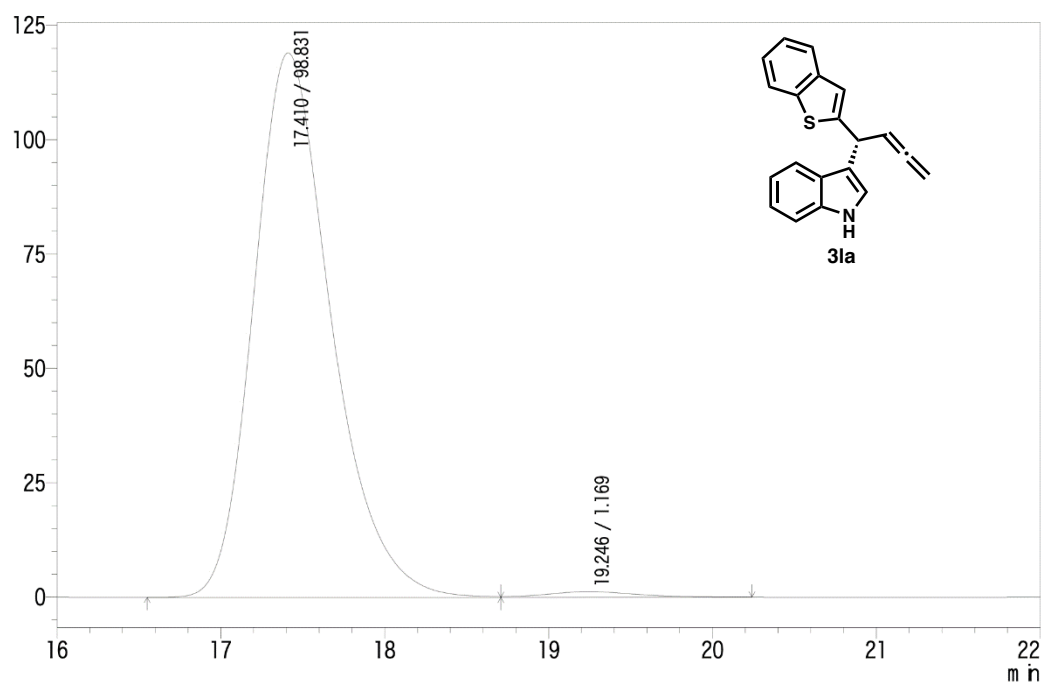

| peak# | retention time | area%   |
|-------|----------------|---------|
| 1     | 17.410         | 98.831  |
| 2     | 19.246         | 1.169   |
| Total |                | 100.000 |

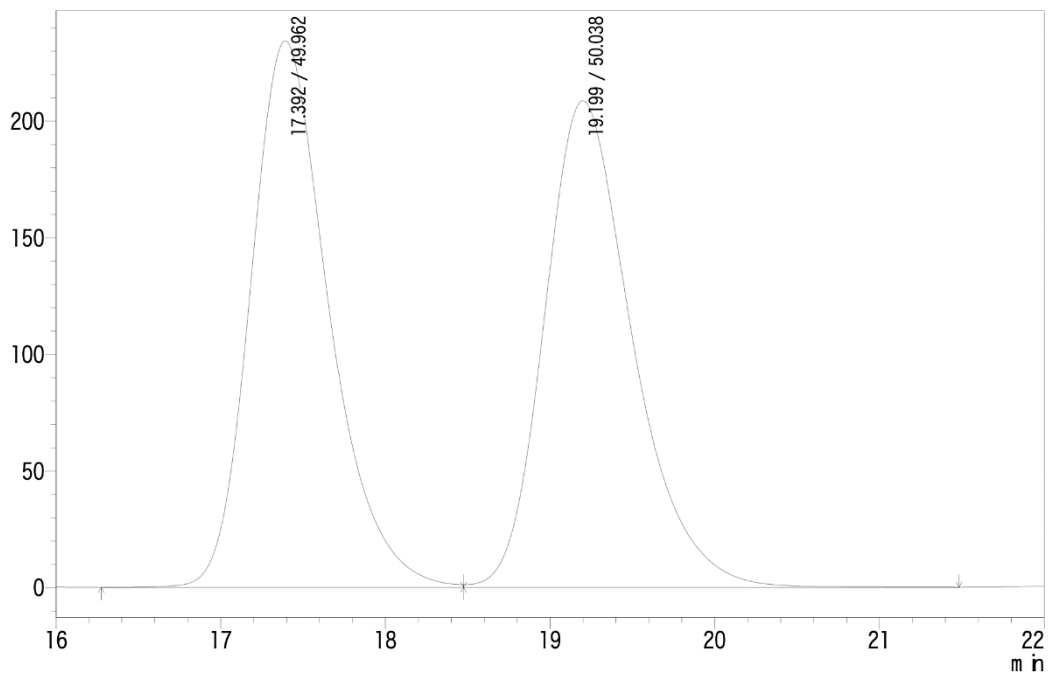

| peak# | retention time | area%   |
|-------|----------------|---------|
| 1     | 17.392         | 49.962  |
| 2     | 19.199         | 50.038  |
| Total |                | 100.000 |

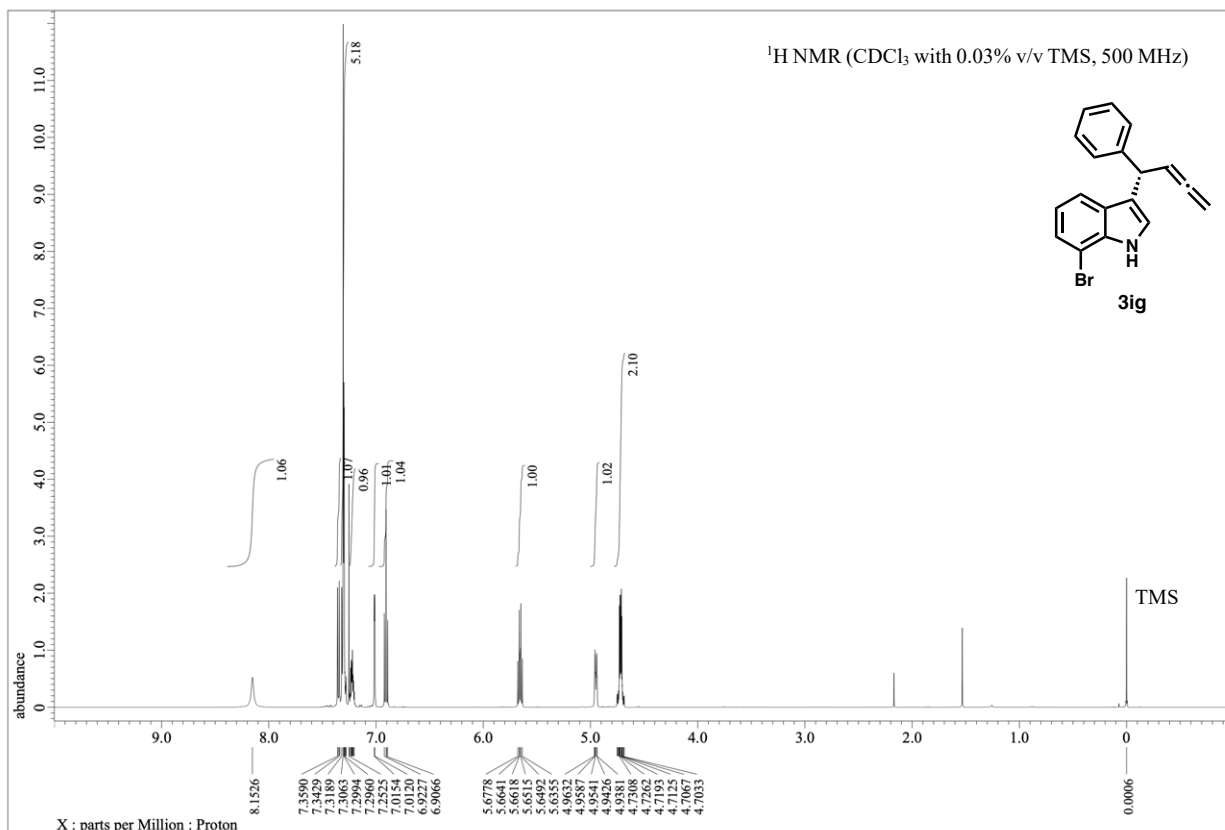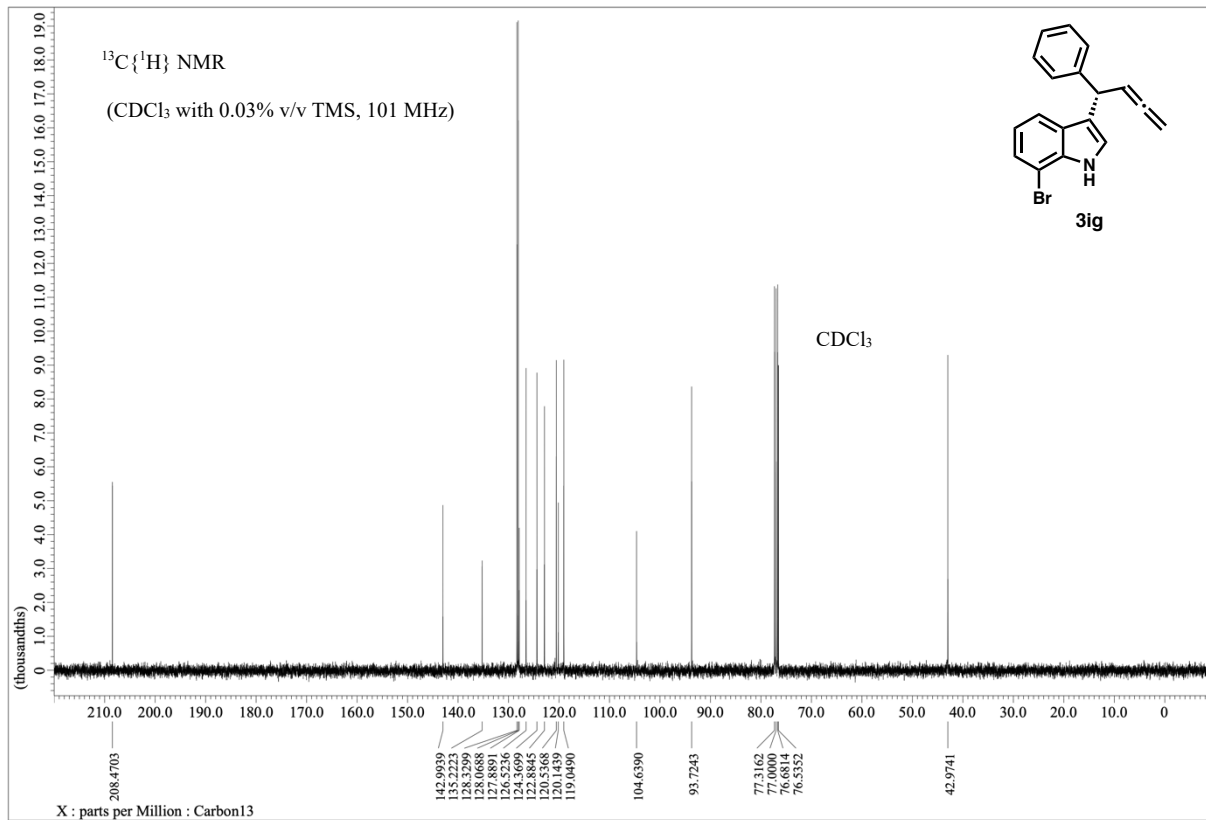

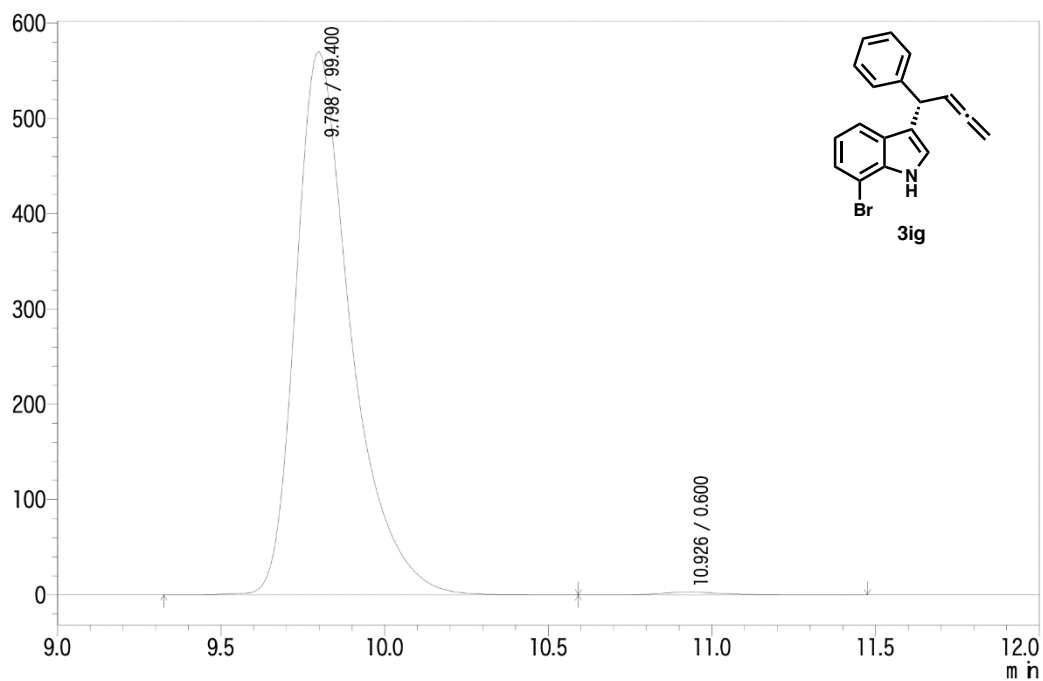

| peak# | retention time | area%   |
|-------|----------------|---------|
| 1     | 9.798          | 99.400  |
| 2     | 10.926         | 0.600   |
| Total |                | 100.000 |

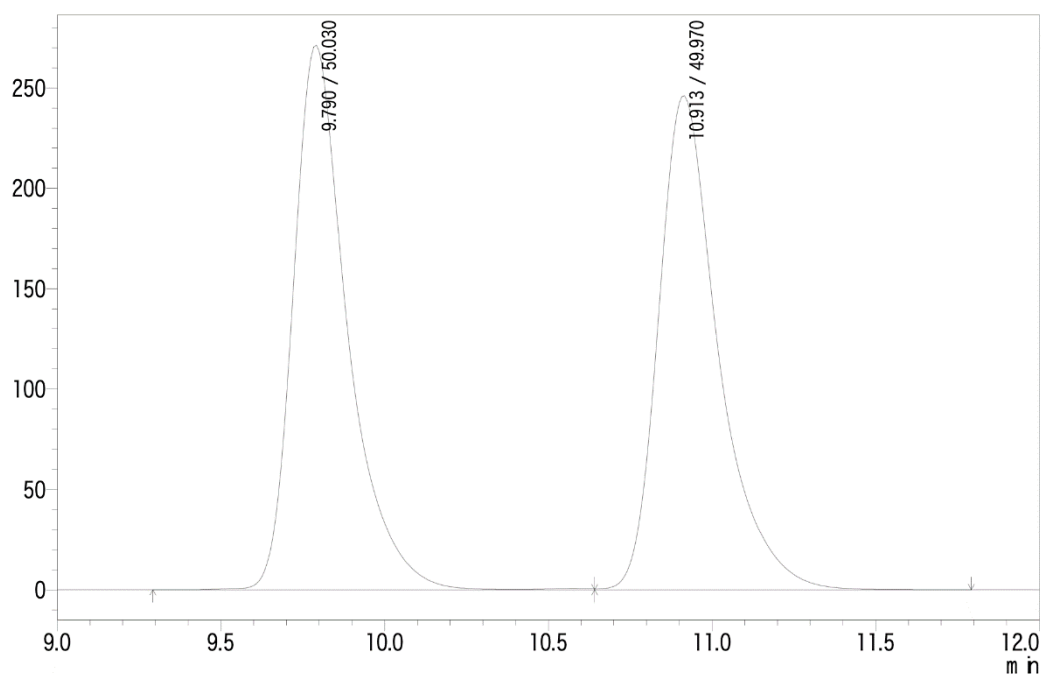

| peak# | retention time | area%   |
|-------|----------------|---------|
| 1     | 9.790          | 50.030  |
| 2     | 10.913         | 49.970  |
| Total |                | 100.000 |

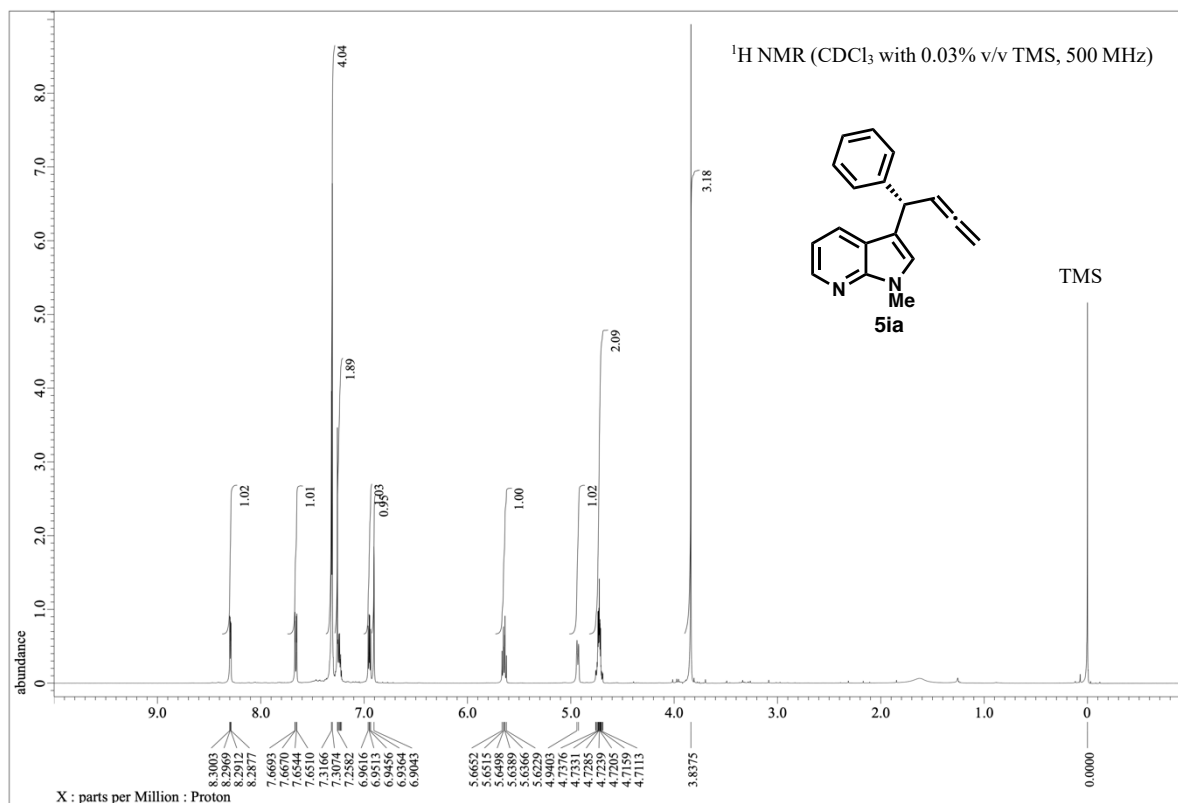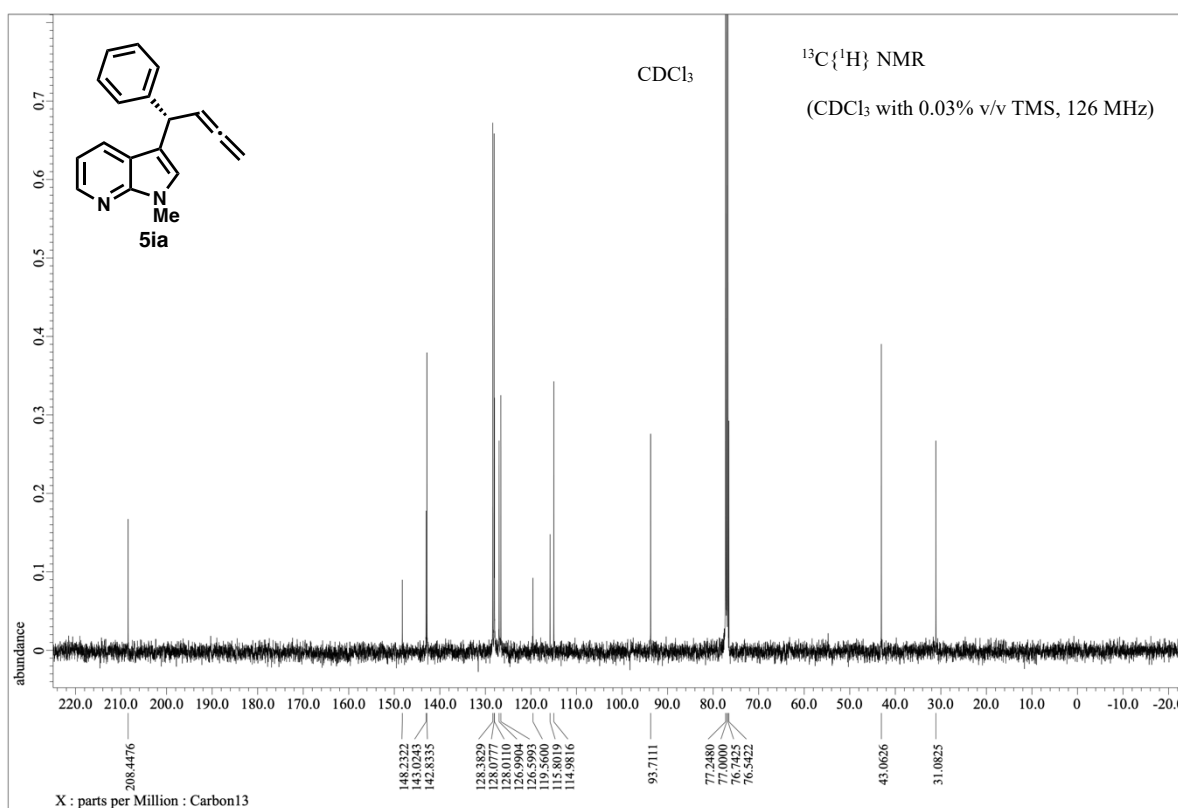

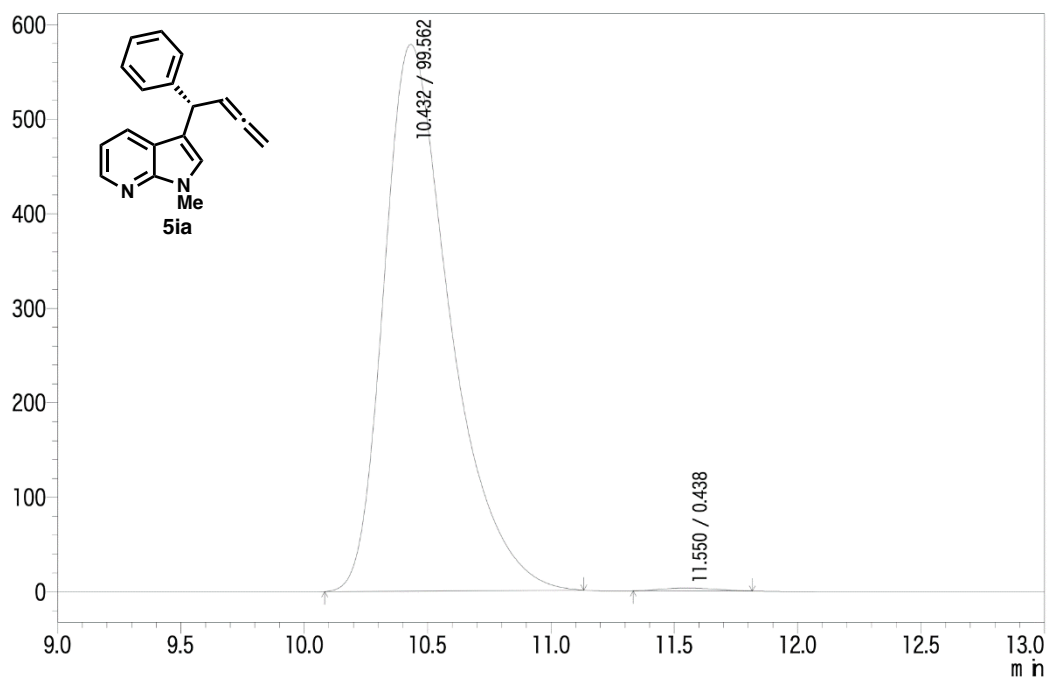

| peak# | retention time | area%   |
|-------|----------------|---------|
| 1     | 10.432         | 99.562  |
| 2     | 11.550         | 0.438   |
| Total |                | 100.000 |

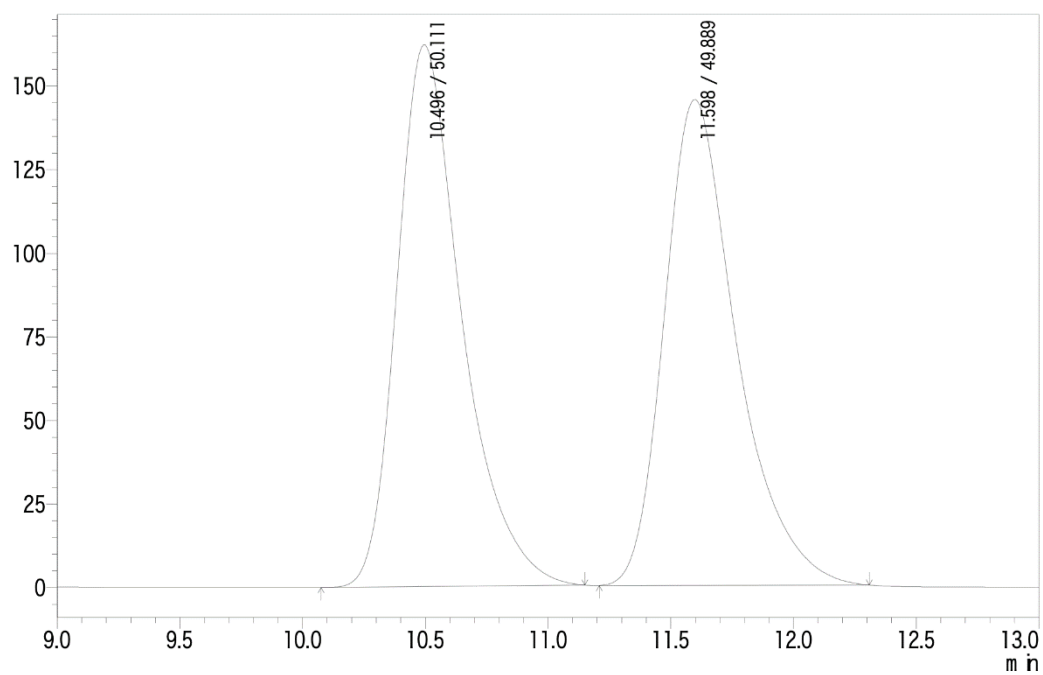

| peak# | retention time | area%   |
|-------|----------------|---------|
| 1     | 10.496         | 50.111  |
| 2     | 11.598         | 49.889  |
| Total |                | 100.000 |



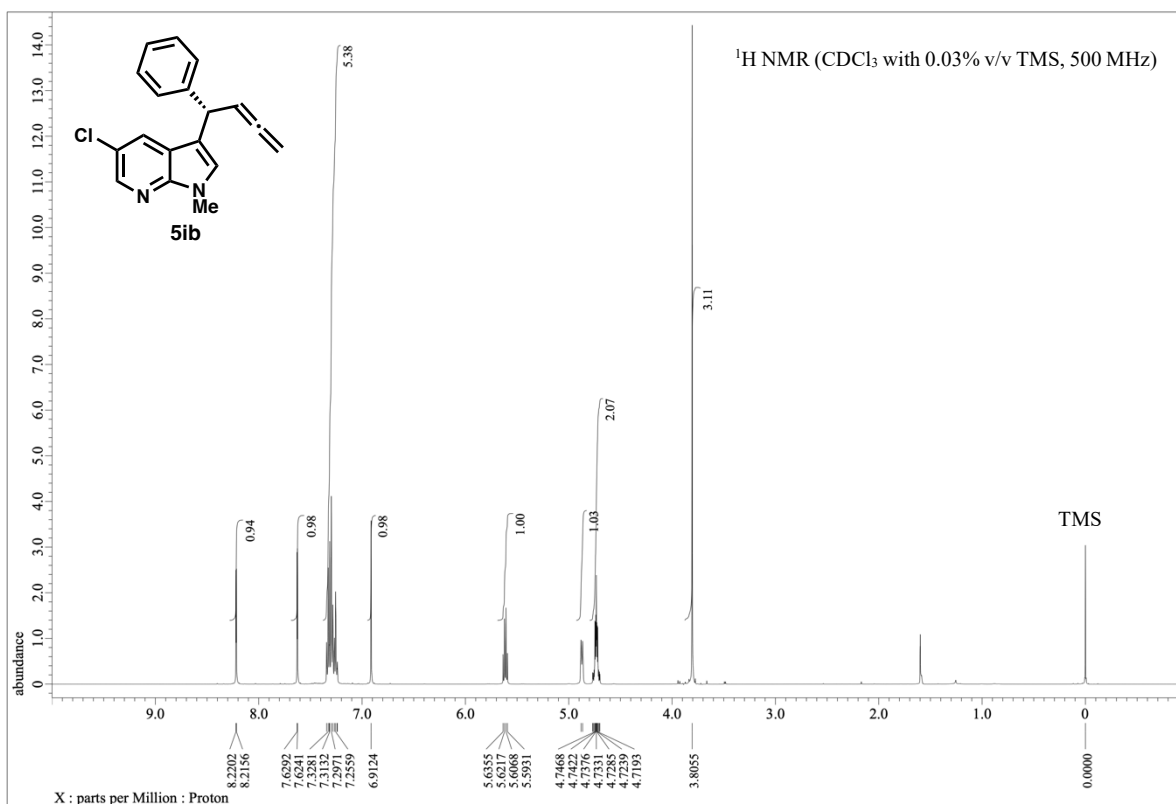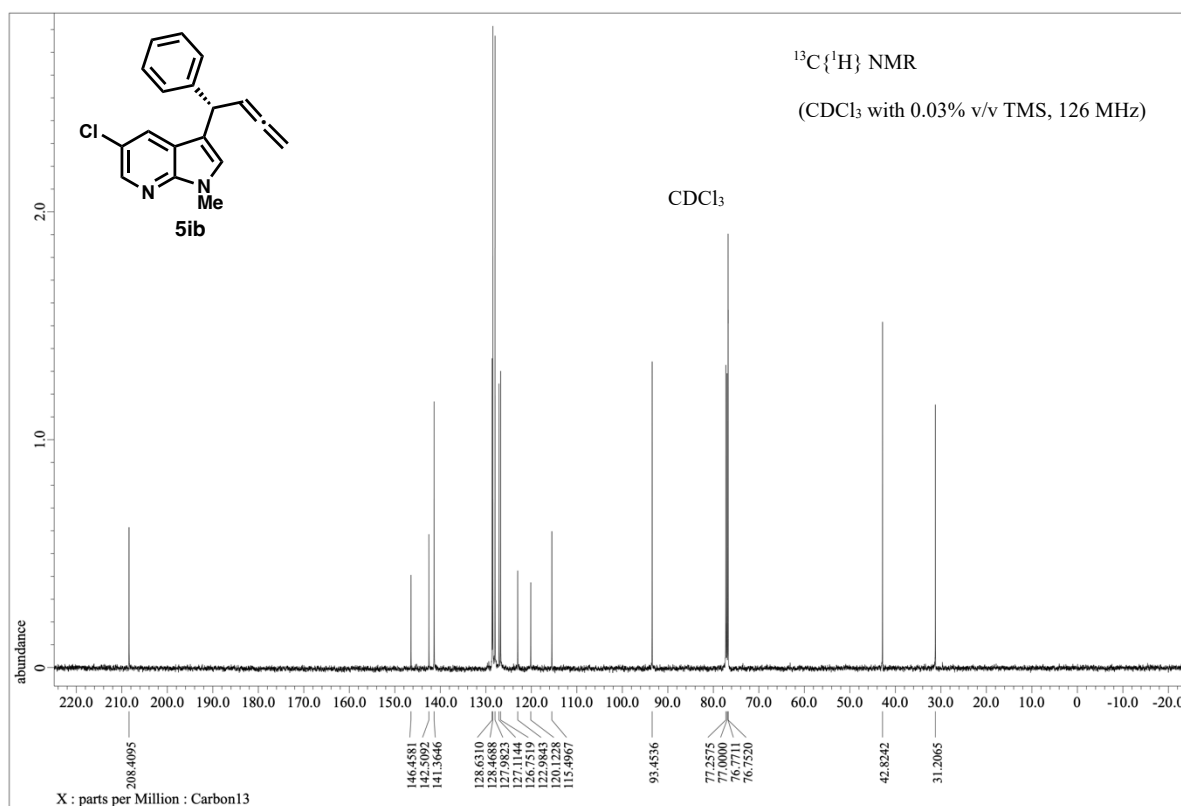

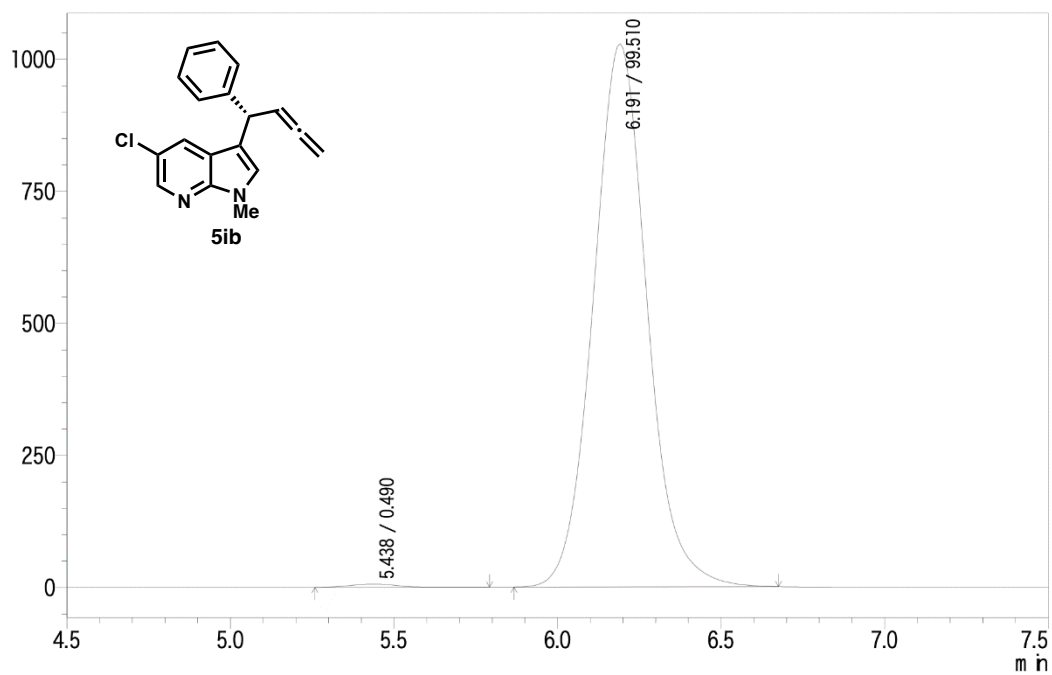

| peak# | retention time | area%   |
|-------|----------------|---------|
| 1     | 5.438          | 0.490   |
| 2     | 6.191          | 99.510  |
| Total |                | 100.000 |

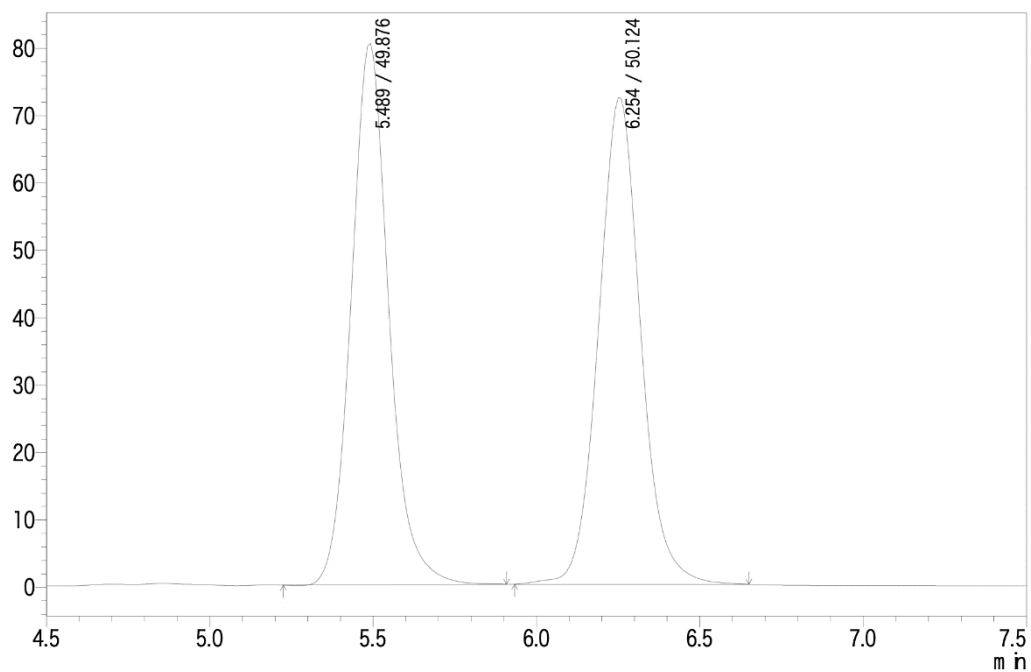

| peak# | retention time | area%   |
|-------|----------------|---------|
| 1     | 5.489          | 49.876  |
| 2     | 6.254          | 50.124  |
| Total |                | 100.000 |

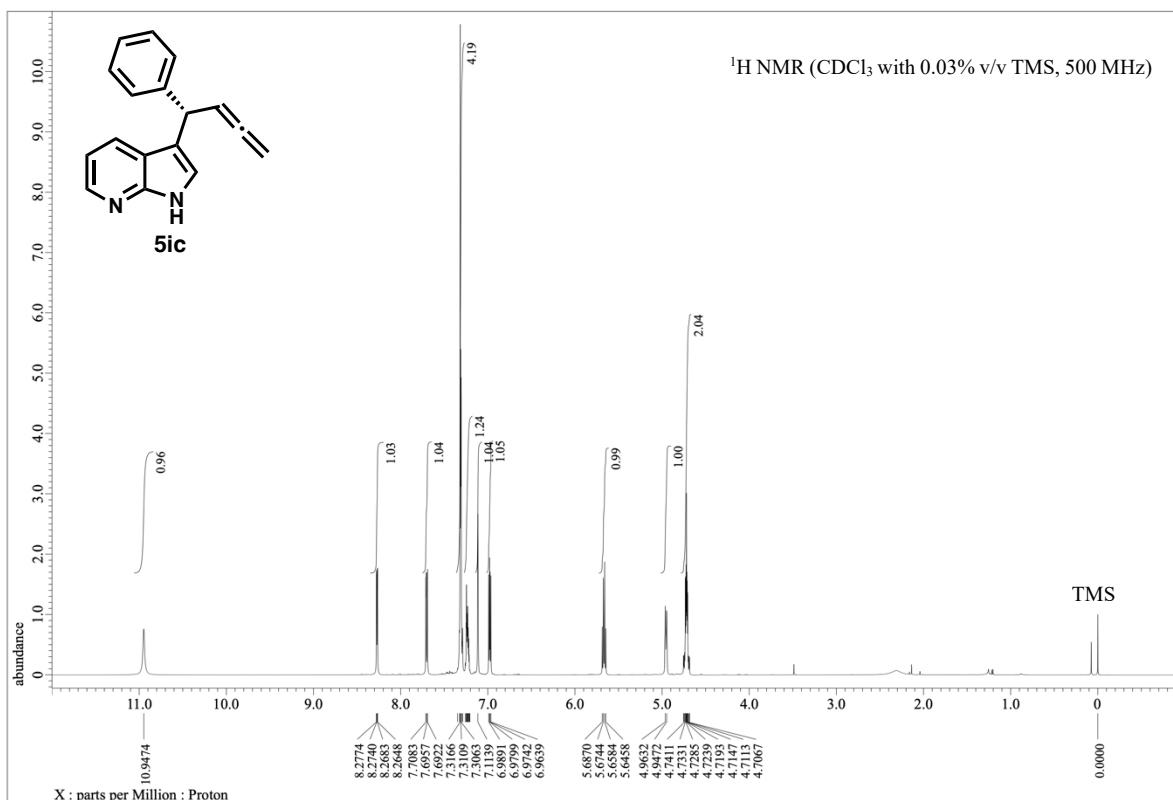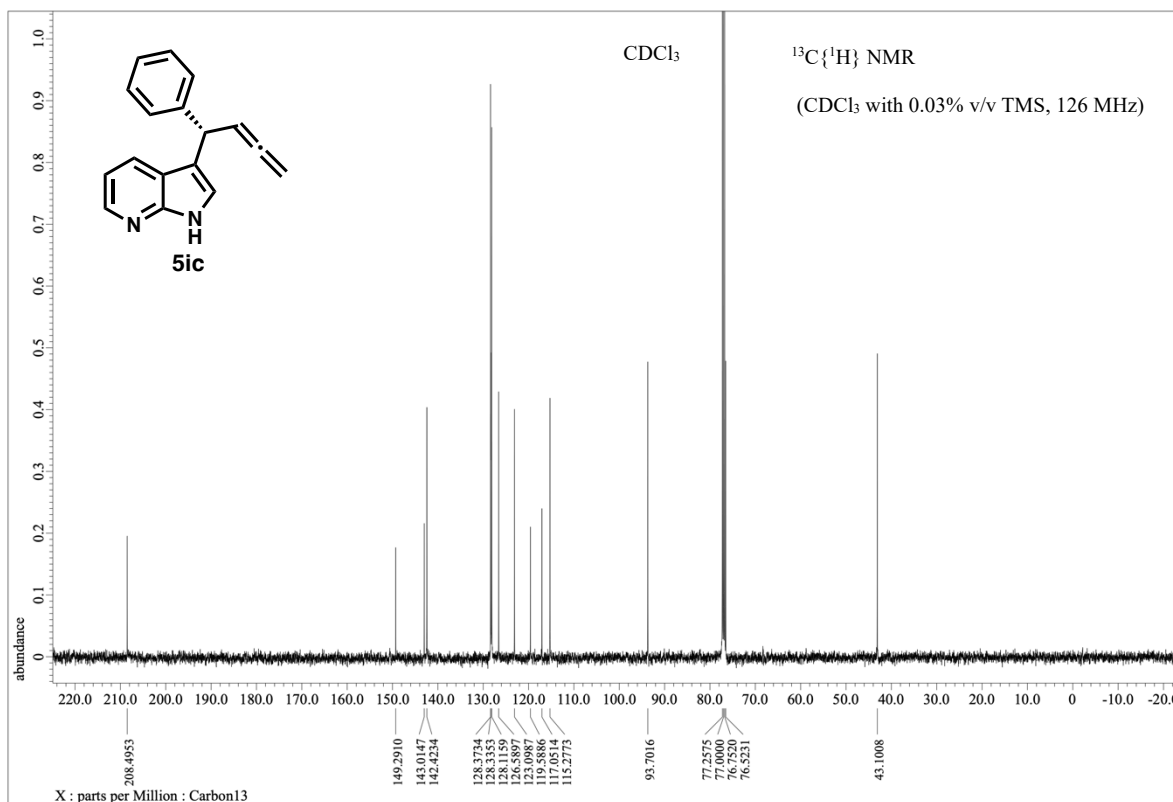

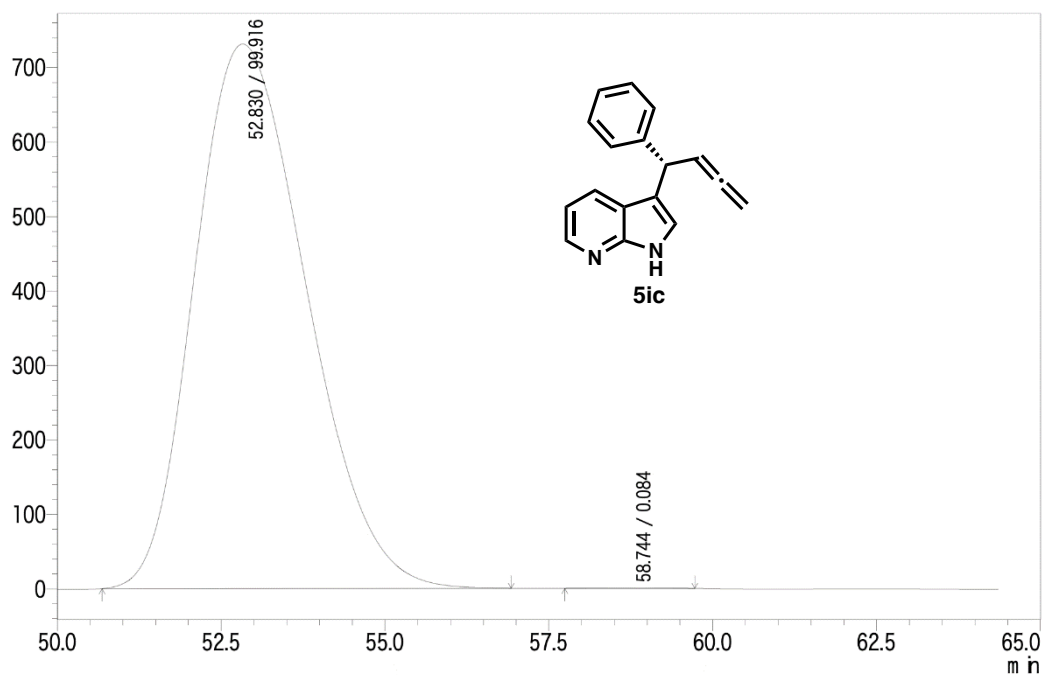

| peak# | retention time | area%   |
|-------|----------------|---------|
| 1     | 52.830         | 99.916  |
| 2     | 58.744         | 0.084   |
| Total |                | 100.000 |

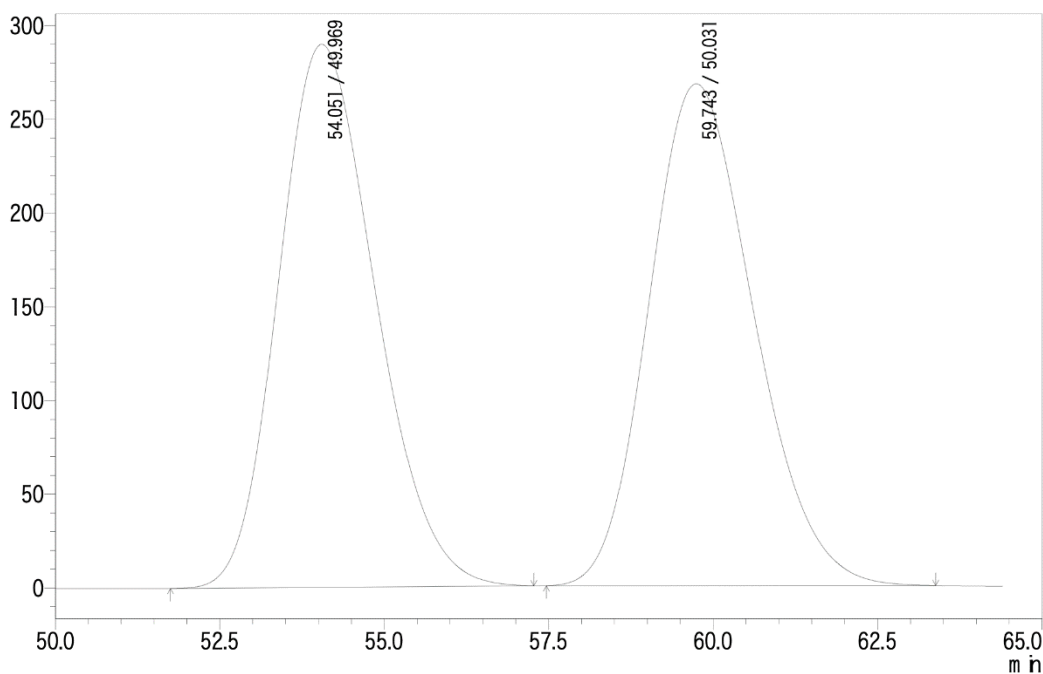

| peak# | retention time | area%   |
|-------|----------------|---------|
| 1     | 54.051         | 49.969  |
| 2     | 59.743         | 50.031  |
| Total |                | 100.000 |

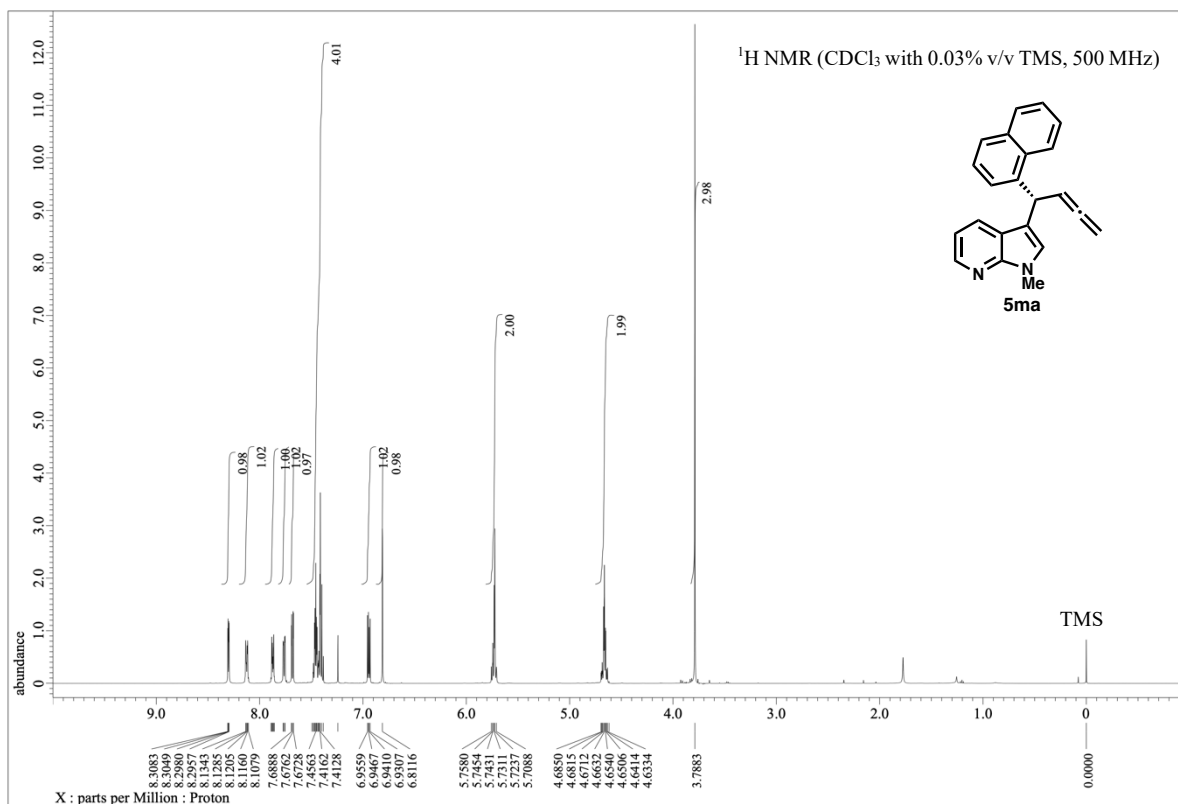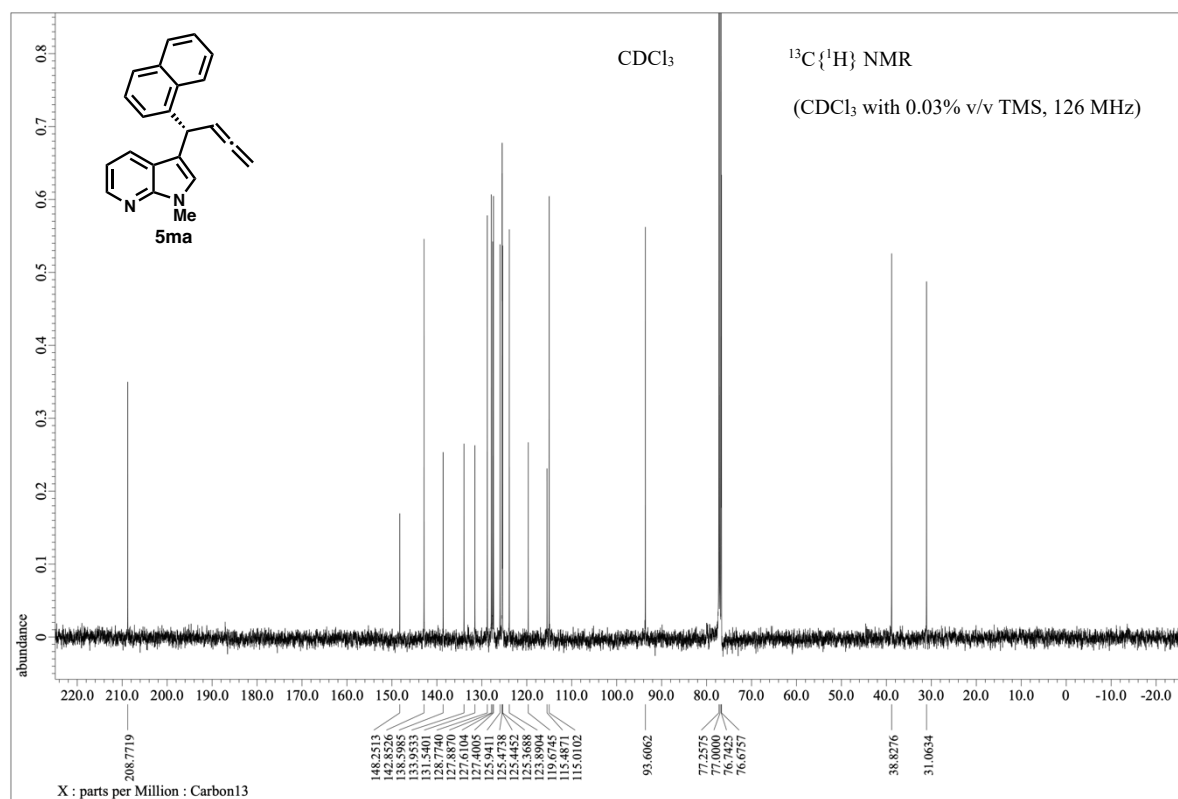

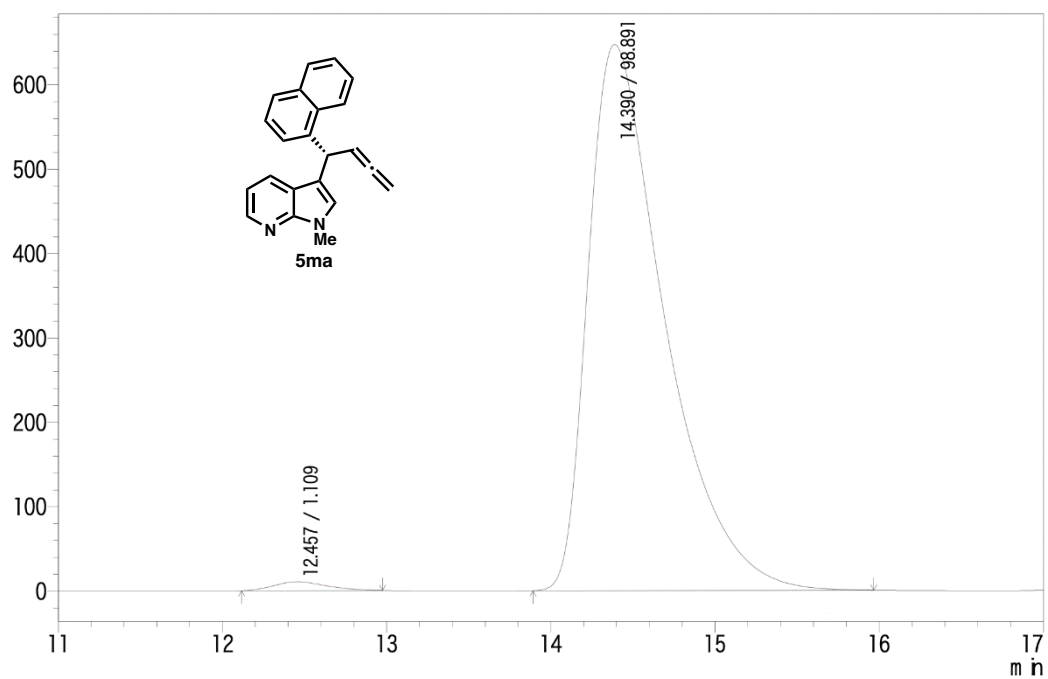

| peak# | retention time | area%   |
|-------|----------------|---------|
| 1     | 12.457         | 1.109   |
| 2     | 14.390         | 98.891  |
| Total |                | 100.000 |

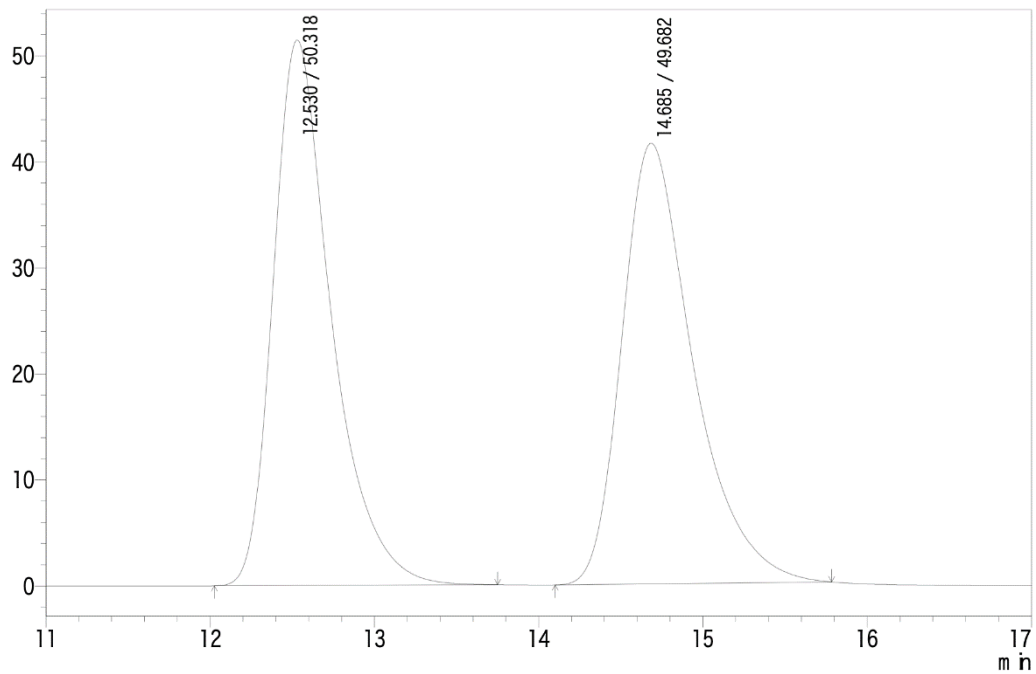

| peak# | retention time | area%   |
|-------|----------------|---------|
| 1     | 12.530         | 50.318  |
| 2     | 14.685         | 49.682  |
| Total |                | 100.000 |

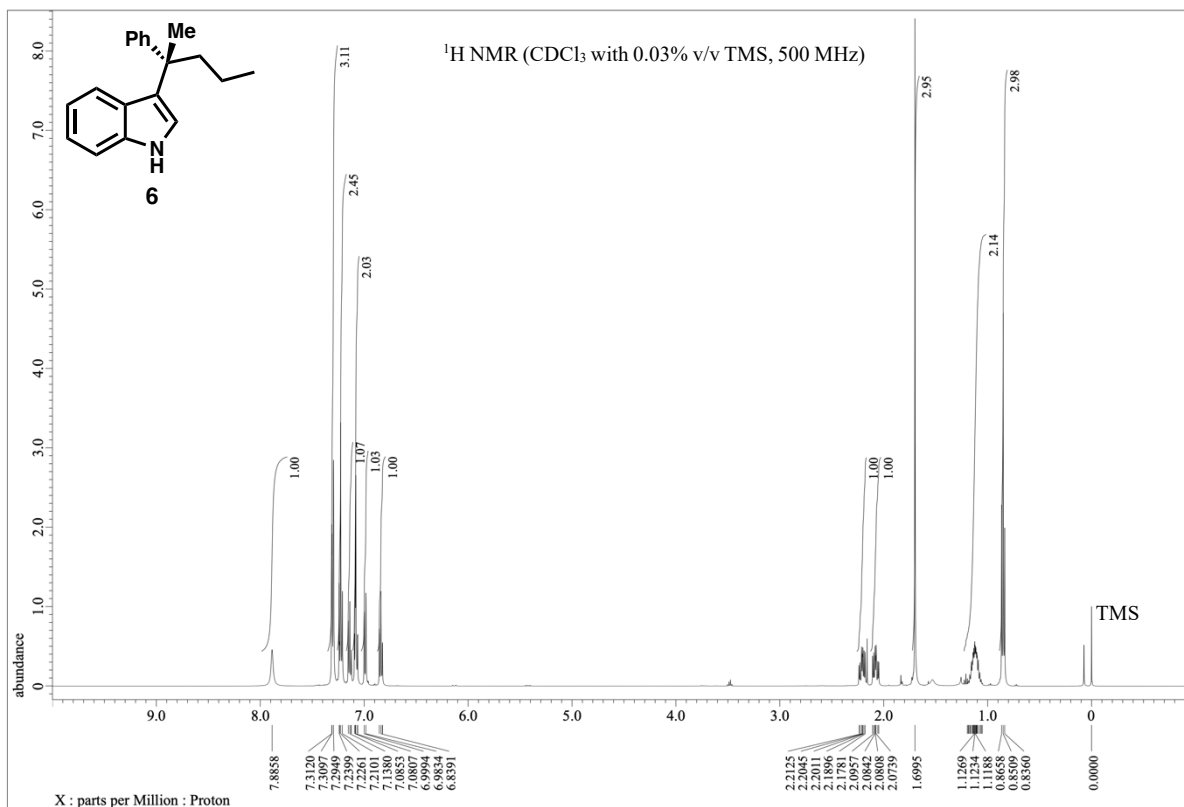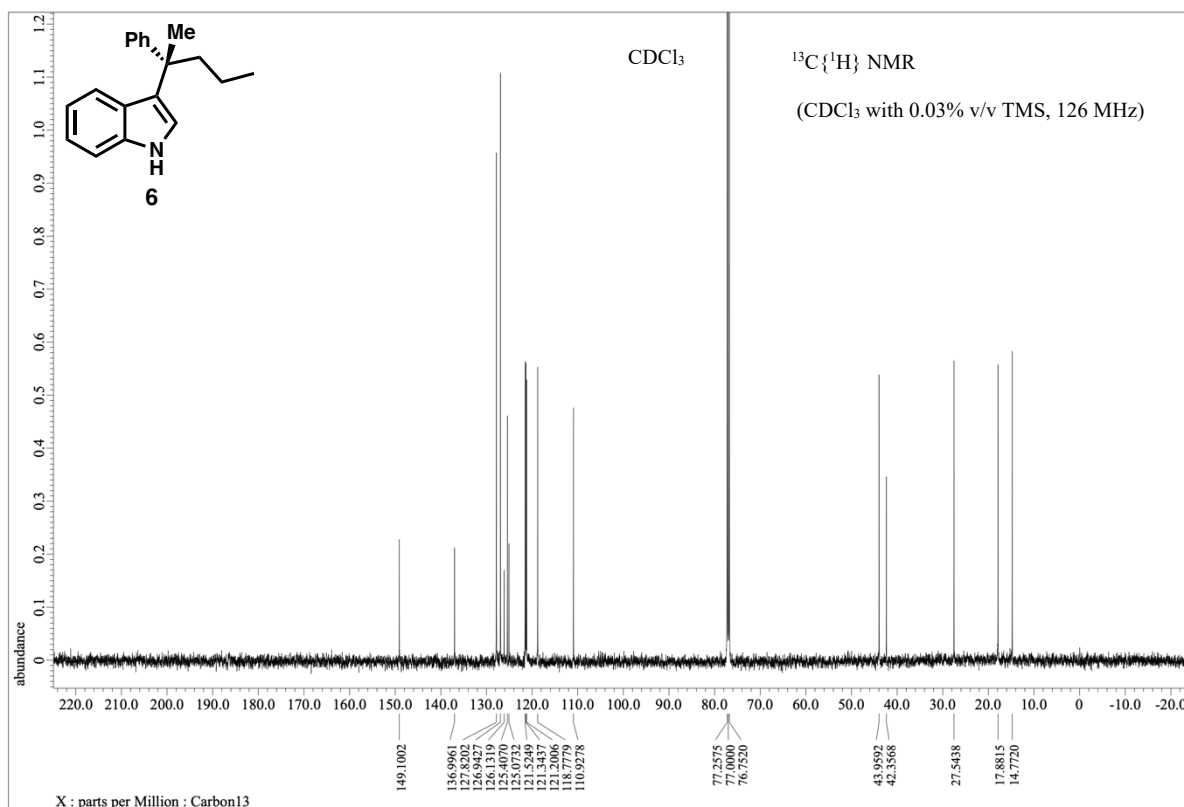

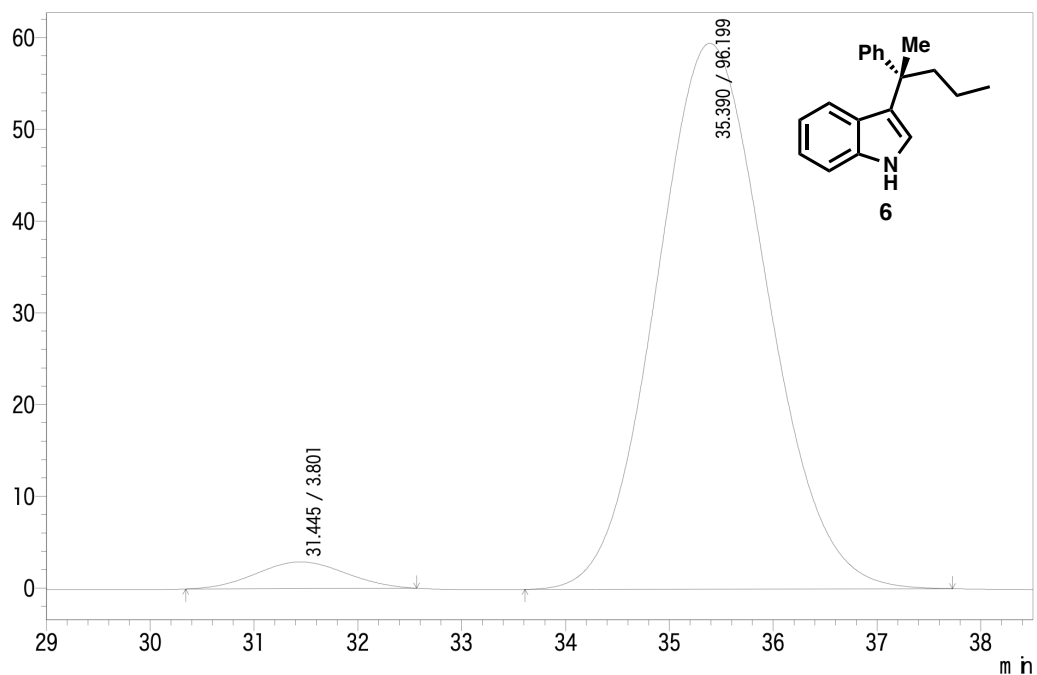

| peak# | retention time | area%   |
|-------|----------------|---------|
| 1     | 31.445         | 3.801   |
| 2     | 35.390         | 96.199  |
| Total |                | 100.000 |

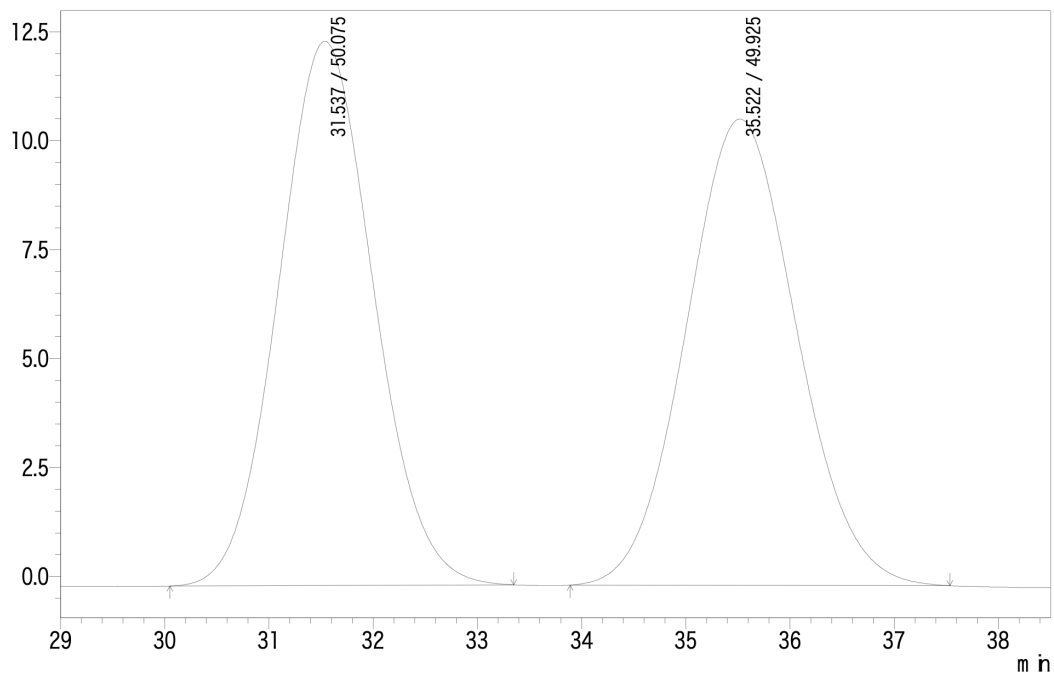

| peak# | retention time | area%   |
|-------|----------------|---------|
| 1     | 31.537         | 50.075  |
| 2     | 35.522         | 49.925  |
| Total |                | 100.000 |



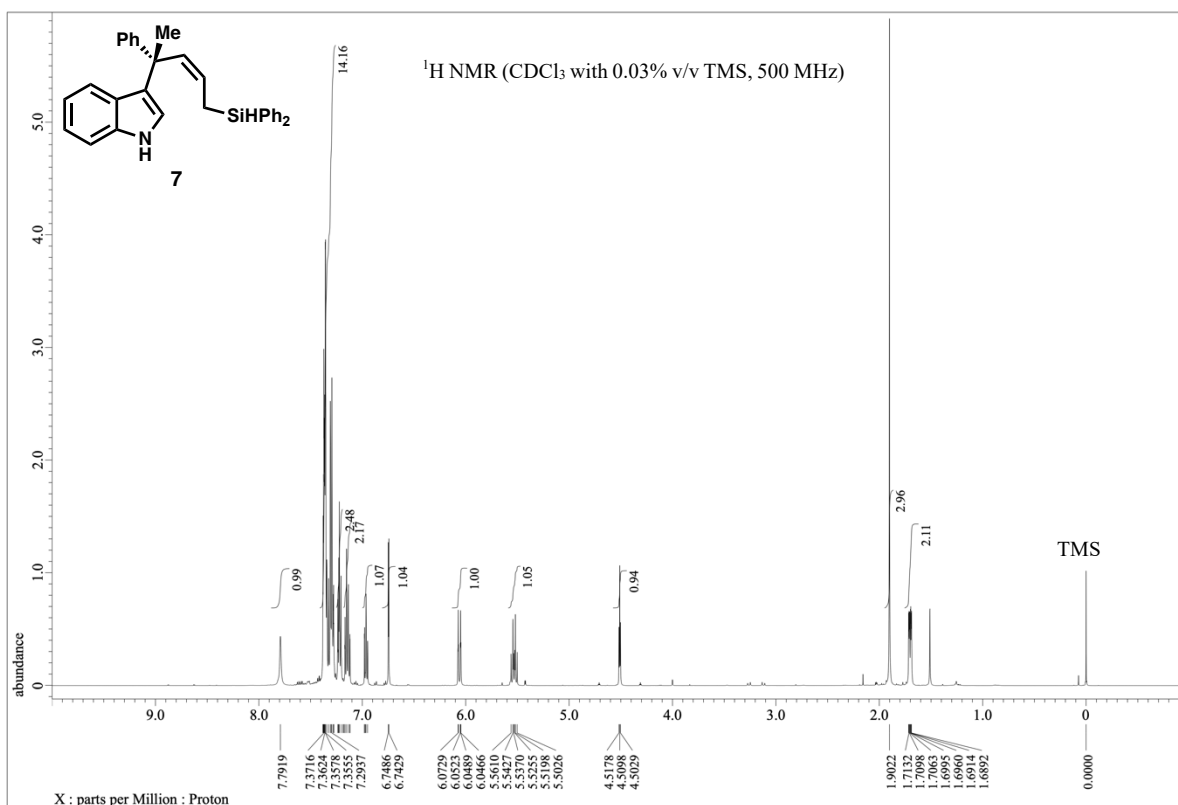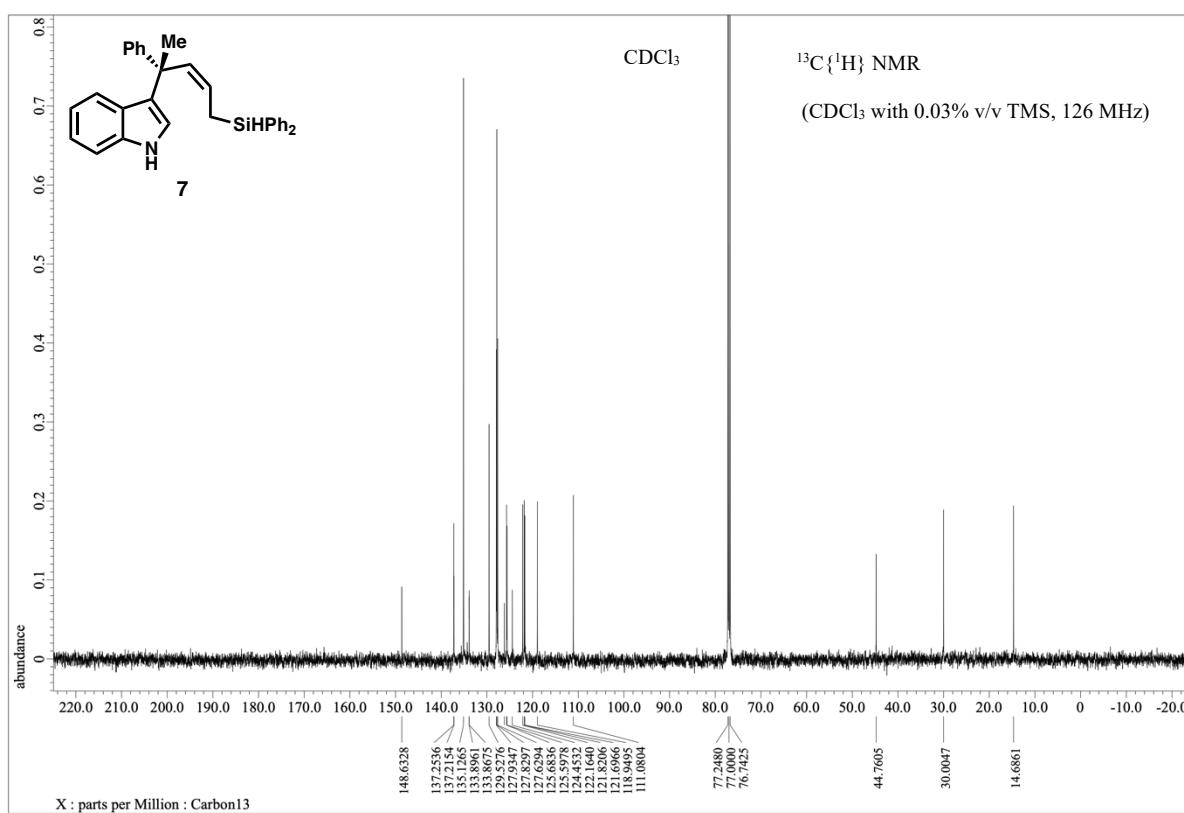

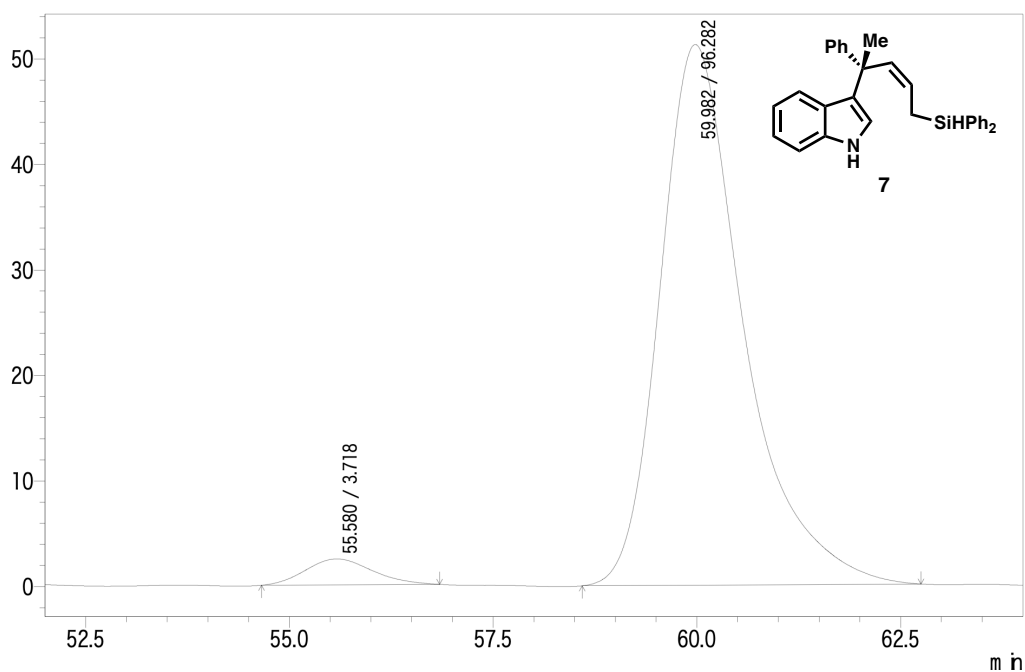

| peak# | retention time | area%   |
|-------|----------------|---------|
| 1     | 55.580         | 3.718   |
| 2     | 59.982         | 96.282  |
| Total |                | 100.000 |

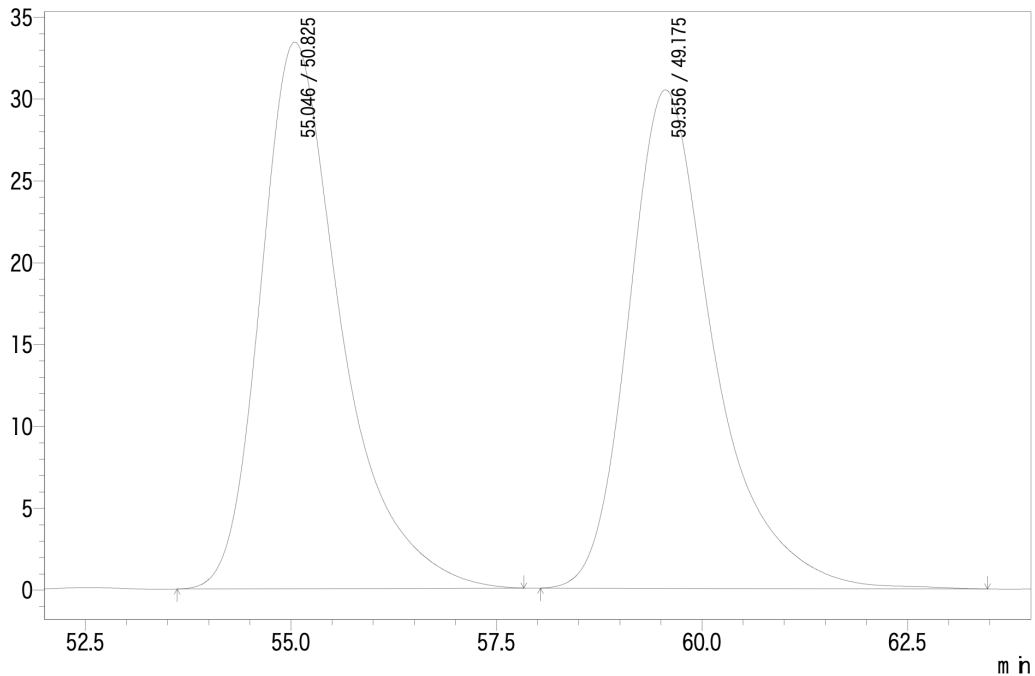

| peak# | retention time | area%   |
|-------|----------------|---------|
| 1     | 55.046         | 50.825  |
| 2     | 59.556         | 49.175  |
| Total |                | 100.000 |
